# Supplementary material for: Genes Possessing the Most Frequent DNA DSBs Are Highly Associated with Development and Cancers, and Essentially Overlap with the rDNA-Contacting Genes
Source: MDPI journal article supplement (doi:10.3390/ijms23137201), 2022-06-28
Supplement: s1 [file s1]

| Gene name    | Gene ID         | DSBs, reads | Expression, TPM |
|--------------|-----------------|-------------|-----------------|
| OR4F16       | ENSG00000185097 | 107634      | 0               |
| RDH14        | ENSG00000240857 | 79824.5     | 17.34           |
| NT5C1B       | ENSG00000185013 | 79824.5     | 0.255           |
| NT5C1B-RDH14 | ENSG00000250741 | 79824.5     | 0.075           |
| CD247        | ENSG00000198821 | 69650.5     | 0.145           |
| SUCLG2       | ENSG00000172340 | 64157.5     | 29.5            |
| POLDIP3      | ENSG00000100227 | 58379       | 71.18           |
| LNX2         | ENSG00000139517 | 56897.5     | 6.975           |
| FAM188B2     | ENSG00000214237 | 55227       | 0.16            |
| CLRN1-AS1    | ENSG00000239265 | 55227       | 0.115           |
| CLRN1        | ENSG00000163646 | 55227       | 0.025           |
| DNAH11       | ENSG00000105877 | 54513       | 5.51            |
| ZDHHC14      | ENSG00000175048 | 51911       | 8.01            |
| MIR3692      | ENSG00000266617 | 51911       | 0               |
| RIC8B        | ENSG00000111785 | 51588       | 13.7            |
| SLC39A11     | ENSG00000133195 | 50818.5     | 8.565           |
| RPAP3        | ENSG00000005175 | 49163.5     | 48.38           |
| RCN1         | ENSG00000049449 | 48254.5     | 131.885         |
| ENPP1        | ENSG00000197594 | 47473       | 15.82           |
| RN7SKP245    | ENSG00000200895 | 47473       | 0.895           |
| ZNF804B      | ENSG00000182348 | 46382.5     | 0.015           |
| SLC35E3      | ENSG00000175782 | 46031.5     | 9.82            |
| PRDX2        | ENSG00000167815 | 44406       | 366.04          |
| HOOK2        | ENSG00000095066 | 44406       | 15.125          |
| RTBDN        | ENSG00000132026 | 44406       | 0.72            |
| ADAMTS16     | ENSG00000145536 | 43793.5     | 0               |
| CCDC26       | ENSG00000229140 | 43015       | 0               |
| BLZF1        | ENSG00000117475 | 42235.5     | 16.78           |
| LDB2         | ENSG00000169744 | 42129.5     | 0.025           |
| GPC5         | ENSG00000179399 | 41765.5     | 1.075           |
| GPC5-IT1     | ENSG00000236240 | 41765.5     | 0               |
| MIR548AS     | ENSG00000263741 | 41765.5     | 0               |
| NRXN1        | ENSG00000179915 | 41617       | 0.04            |
| ASPH         | ENSG00000198363 | 41602.5     | 51.64           |
| B4GALNT2     | ENSG00000167080 | 40848.5     | 0               |
| F8           | ENSG00000185010 | 40125       | 2.16            |
| EEF1A1P31    | ENSG00000237859 | 40125       | 0.055           |
| PRMT3        | ENSG00000185238 | 39324.5     | 33.275          |
| GSS          | ENSG00000100983 | 39297       | 30.035          |
| RDH13        | ENSG00000160439 | 38754       | 24.415          |
| GP6          | ENSG00000088053 | 38754       | 0.265           |
| PRKCI        | ENSG00000163558 | 37486       | 34.64           |
| MOV10L1      | ENSG00000073146 | 37361       | 0.065           |
| WDR20        | ENSG00000140153 | 36691       | 15.39           |
| TACC2        | ENSG00000138162 | 36289.5     | 5.785           |
| SLCO3A1      | ENSG00000176463 | 35662.5     | 0.235           |

|             |                 |         |        |
|-------------|-----------------|---------|--------|
| EFCAB6      | ENSG00000186976 | 35371.5 | 1.515  |
| MAP4K4      | ENSG00000071054 | 35071   | 61.865 |
| FLJ20373    | ENSG00000233404 | 35071   | 0.14   |
| PDE4D       | ENSG00000113448 | 34838   | 4.455  |
| COPS8P2     | ENSG00000214552 | 34276.5 | 0.15   |
| FAM19A1     | ENSG00000183662 | 34276.5 | 0.1    |
| DISC1FP1    | ENSG00000261645 | 33883.5 | 0      |
| PDCL        | ENSG00000136940 | 33834.5 | 19.065 |
| DNMT1       | ENSG00000130816 | 33612   | 260.19 |
| S1PR2       | ENSG00000267534 | 33612   | 4.355  |
| TTC9C       | ENSG00000162222 | 33559.5 | 43.795 |
| HLX         | ENSG00000136630 | 33530.5 | 14.225 |
| LLPH        | ENSG00000139233 | 32938.5 | 37.205 |
| TMBIM4      | ENSG00000228144 | 32938.5 | 13.265 |
| SLC9A1      | ENSG00000090020 | 32457.5 | 18.16  |
| PDE7B       | ENSG00000171408 | 32308   | 0.32   |
| ANTXR2      | ENSG00000163297 | 32182.5 | 9.24   |
| R3HDM1      | ENSG00000048991 | 32145.5 | 74.22  |
| FAM155A     | ENSG00000204442 | 32015   | 0.015  |
| FAM155A-IT1 | ENSG00000227248 | 32015   | 0      |
| C6orf89     | ENSG00000198663 | 31645   | 22.92  |
| NEGR1       | ENSG00000172260 | 31375.5 | 0.035  |
| NEGR1-IT1   | ENSG00000228853 | 31375.5 | 0      |
| PBX3        | ENSG00000167081 | 31115.5 | 27.01  |
| CD302       | ENSG00000241399 | 30790   | 13.935 |
| LY75        | ENSG00000054219 | 30790   | 0.02   |
| LY75-CD302  | ENSG00000248672 | 30790   | 0      |
| ADCY8       | ENSG00000155897 | 30760   | 0      |
| MGAT4C      | ENSG00000182050 | 30728   | 0      |
| MED13L      | ENSG00000123066 | 30505.5 | 20.075 |
| SPAG16      | ENSG00000144451 | 30158.5 | 13.515 |
| LMBR1       | ENSG00000105983 | 30010   | 65.73  |
| FAM65B      | ENSG00000111913 | 29996.5 | 0.315  |
| ASS1P1      | ENSG00000220517 | 29996.5 | 0      |
| TRPS1       | ENSG00000104447 | 29947.5 | 9.18   |
| CBFB        | ENSG00000067955 | 29884.5 | 60.965 |
| PDE8A       | ENSG00000073417 | 29809   | 21.555 |
| PDE4DIP     | ENSG00000178104 | 29658.5 | 47.57  |
| ZNF823      | ENSG00000197933 | 29640   | 3.53   |
| LINC00948   | ENSG00000227877 | 29620.5 | 0.15   |
| CLASP2      | ENSG00000163539 | 29486   | 64.325 |
| SEMA3A      | ENSG00000075213 | 29366   | 2.87   |
| IL31RA      | ENSG00000164509 | 29351.5 | 0.02   |
| LSAMP       | ENSG00000185565 | 28894   | 1.21   |
| RN7SL582P   | ENSG00000241156 | 28894   | 0      |
| GRID2       | ENSG00000152208 | 28877   | 1.045  |
| IFFO2       | ENSG00000169991 | 28791   | 8.16   |

|             |                 |         |         |
|-------------|-----------------|---------|---------|
| ALDH4A1     | ENSG00000159423 | 28791   | 7.655   |
| MIR4695     | ENSG00000265606 | 28791   | 0       |
| TAS1R2      | ENSG00000179002 | 28791   | 0       |
| RNASET2     | ENSG00000026297 | 28670   | 35.505  |
| RPS6KA2     | ENSG00000071242 | 28670   | 8.88    |
| RPS6KA2-IT1 | ENSG00000232082 | 28670   | 0.115   |
| PRDM12      | ENSG00000130711 | 28644.5 | 0.325   |
| SETD4       | ENSG00000185917 | 28492   | 21.285  |
| LINC00923   | ENSG00000251209 | 28485.5 | 0.125   |
| GK5         | ENSG00000175066 | 28403.5 | 14.885  |
| PTGFR       | ENSG00000122420 | 28382   | 2.595   |
| TENM3       | ENSG00000218336 | 28349.5 | 15.885  |
| MIR1305     | ENSG00000221227 | 28349.5 | 0       |
| ANKRD36BP2  | ENSG00000230006 | 28282   | 0.52    |
| CHERP       | ENSG00000085872 | 28140.5 | 94.825  |
| SLC35E1     | ENSG00000127526 | 28140.5 | 55.455  |
| SMIM7       | ENSG00000214046 | 28140.5 | 40.93   |
| MED26       | ENSG00000105085 | 28140.5 | 12.52   |
| CALR3       | ENSG00000269058 | 28140.5 | 0.1     |
| C2orf40     | ENSG00000119147 | 28097.5 | 0.11    |
| DOCK1       | ENSG00000150760 | 28082.5 | 13.37   |
| WWC1        | ENSG00000113645 | 28048.5 | 21.345  |
| CLDN18      | ENSG00000066405 | 27990.5 | 0.275   |
| C12orf49    | ENSG00000111412 | 27883   | 22.54   |
| KIF22       | ENSG00000079616 | 27670   | 80.22   |
| ANXA2R      | ENSG00000177721 | 27470.5 | 0.25    |
| CTDSPL2     | ENSG00000137770 | 27415   | 36.01   |
| SLC25A17    | ENSG00000100372 | 27186.5 | 47.64   |
| PMS1        | ENSG00000064933 | 27173.5 | 19.535  |
| CACHD1      | ENSG00000158966 | 27062   | 20.93   |
| MIR4794     | ENSG00000264470 | 27062   | 0       |
| FBXL2       | ENSG00000153558 | 27018.5 | 8.75    |
| RYR1        | ENSG00000196218 | 26908.5 | 0.34    |
| NRG3        | ENSG00000185737 | 26779.5 | 0       |
| ASH1L       | ENSG00000116539 | 26748   | 30.6    |
| MIR555      | ENSG00000207720 | 26748   | 0       |
| C1orf226    | ENSG00000239887 | 26524.5 | 7.23    |
| NOS1AP      | ENSG00000198929 | 26524.5 | 4.785   |
| MIR4654     | ENSG00000266144 | 26524.5 | 0       |
| LATS2       | ENSG00000150457 | 26447   | 4.59    |
| CPA6        | ENSG00000165078 | 26363.5 | 0       |
| TUBA1C      | ENSG00000167553 | 26341.5 | 470.615 |
| LRP1B       | ENSG00000168702 | 26274.5 | 3.045   |
| TBC1D19     | ENSG00000109680 | 26201.5 | 3.38    |
| SPESP1      | ENSG00000258484 | 26084   | 0.21    |
| NOX5        | ENSG00000255346 | 26084   | 0.08    |
| ANP32A      | ENSG00000140350 | 26010   | 412.92  |

|           |                 |         |        |
|-----------|-----------------|---------|--------|
| PCED1B    | ENSG00000179715 | 25902.5 | 0      |
| IQCG      | ENSG00000114473 | 25771   | 7.195  |
| ASTN2     | ENSG00000148219 | 25509   | 1.63   |
| TLN2      | ENSG00000171914 | 25233   | 6.775  |
| EPB41     | ENSG00000159023 | 25150   | 144.37 |
| SEMA3D    | ENSG00000153993 | 25007.5 | 4.45   |
| PHACTR1   | ENSG00000112137 | 25004.5 | 2.77   |
| MYOT      | ENSG00000120729 | 24834.5 | 1.165  |
| DPP6      | ENSG00000130226 | 24712   | 0      |
| PTH2R     | ENSG00000144407 | 24652.5 | 0.025  |
| RNF145    | ENSG00000145860 | 24597   | 40.11  |
| NREP      | ENSG00000134986 | 24540.5 | 21.07  |
| RN7SKP57  | ENSG00000253057 | 24540.5 | 0      |
| SCAF8     | ENSG00000213079 | 24374   | 40.86  |
| TIAM2     | ENSG00000146426 | 24374   | 8.485  |
| NNT-AS1   | ENSG00000248092 | 24267   | 9.505  |
| SLC14A2   | ENSG00000132874 | 24250   | 0      |
| STOX2     | ENSG00000173320 | 24227   | 8.945  |
| FHOD3     | ENSG00000134775 | 24215   | 7.275  |
| KSR2      | ENSG00000171435 | 24197   | 1.27   |
| MAPRE2    | ENSG00000166974 | 24167   | 88.04  |
| NLGN4X    | ENSG00000146938 | 24109.5 | 0      |
| PTGIS     | ENSG00000124212 | 24062.5 | 0.135  |
| PRKAG2    | ENSG00000106617 | 24060.5 | 19.265 |
| DCHS2     | ENSG00000197410 | 24023   | 0.77   |
| WWC3      | ENSG00000047644 | 23888.5 | 0.01   |
| TJP1      | ENSG00000104067 | 23825   | 37.515 |
| GRM8      | ENSG00000179603 | 23701.5 | 0.125  |
| LINC01076 | ENSG00000225105 | 23603   | 0      |
| UNC5C     | ENSG00000182168 | 23586   | 9.115  |
| ZSWIM6    | ENSG00000130449 | 23548   | 13.43  |
| NUDT6     | ENSG00000170917 | 23488   | 5.58   |
| ARL5AP2   | ENSG00000236818 | 23479   | 0      |
| HPSE2     | ENSG00000172987 | 23479   | 0      |
| OR5P1P    | ENSG00000166408 | 23277   | 0      |
| OR5P2     | ENSG00000183303 | 23277   | 0      |
| OR5P3     | ENSG00000182334 | 23277   | 0      |
| OVCH2     | ENSG00000183378 | 23277   | 0      |
| CLCN1     | ENSG00000188037 | 23262.5 | 0.04   |
| SLC35F3   | ENSG00000183780 | 23087.5 | 0.135  |
| LINC00467 | ENSG00000153363 | 23053   | 14.62  |
| PRLR      | ENSG00000113494 | 23045   | 0.04   |
| PAGR1     | ENSG00000185928 | 23005   | 19.265 |
| MVP       | ENSG00000013364 | 23005   | 2.885  |
| ADCY7     | ENSG00000121281 | 22999.5 | 3.215  |
| HIVEP3    | ENSG00000127124 | 22970   | 2.185  |
| FTO       | ENSG00000140718 | 22909.5 | 42.58  |

|             |                 |         |        |
|-------------|-----------------|---------|--------|
| MARCH7      | ENSG00000136536 | 22756.5 | 52.145 |
| NPAS3       | ENSG00000151322 | 22719.5 | 0.56   |
| UTRN        | ENSG00000152818 | 22543.5 | 25.645 |
| RGS7BP      | ENSG00000186479 | 22508.5 | 0.015  |
| KALRN       | ENSG00000160145 | 22461   | 2.985  |
| MIR5002     | ENSG00000266383 | 22461   | 0      |
| UBAP2       | ENSG00000137073 | 22284   | 57.38  |
| PITPNC1     | ENSG00000154217 | 22265.5 | 10.13  |
| RNF219-AS1  | ENSG00000234377 | 22251.5 | 1.49   |
| LINC00446   | ENSG00000229249 | 22251.5 | 0      |
| SRGNP1      | ENSG00000271386 | 22251.5 | 0      |
| SEC23B      | ENSG00000101310 | 22184   | 59.25  |
| PCDH9       | ENSG00000184226 | 22178   | 31.25  |
| RNU7-87P    | ENSG00000238500 | 22178   | 0      |
| LTV1        | ENSG00000135521 | 22113.5 | 92.22  |
| PHACTR2     | ENSG00000112419 | 22113.5 | 29.2   |
| DCAF12      | ENSG00000198876 | 22093.5 | 40.455 |
| MRM1        | ENSG00000129282 | 21976.5 | 4.695  |
| WIPF3       | ENSG00000122574 | 21933   | 2.65   |
| ENOX1       | ENSG00000120658 | 21718   | 3.805  |
| SNX31       | ENSG00000174226 | 21571.5 | 0      |
| ACOXL       | ENSG00000153093 | 21541.5 | 0.3    |
| RPL5P9      | ENSG00000236330 | 21541.5 | 0.3    |
| SPRR2D      | ENSG00000163216 | 21541   | 0      |
| NTRK3       | ENSG00000140538 | 21525.5 | 0.03   |
| CBL         | ENSG00000110395 | 21478   | 15.72  |
| ARNT        | ENSG00000143437 | 21300.5 | 31.525 |
| ATRNL1      | ENSG00000107518 | 21299   | 4.02   |
| PLEKHG4B    | ENSG00000153404 | 21225   | 0.195  |
| VWDE        | ENSG00000146530 | 21132.5 | 2.11   |
| EGLN2       | ENSG00000269858 | 21108   | 39.065 |
| RAB4B       | ENSG00000167578 | 21108   | 6.065  |
| MIA         | ENSG00000261857 | 21108   | 0.115  |
| CYP2G1P     | ENSG00000130612 | 21108   | 0.025  |
| MIA-RAB4B   | ENSG00000268975 | 21108   | 0      |
| RAB4B-EGLN2 | ENSG00000171570 | 21108   | 0      |
| GCNT6       | ENSG00000205318 | 21068.5 | 0.085  |
| SEMA5A      | ENSG00000112902 | 21046   | 0      |
| LRRFIP2     | ENSG00000093167 | 21014   | 38.425 |
| UBE2FP1     | ENSG00000224080 | 21014   | 1.965  |
| FLT3        | ENSG00000122025 | 20985   | 0.205  |
| IQCH        | ENSG00000103599 | 20942   | 4.91   |
| IQCH-AS1    | ENSG00000259673 | 20942   | 1.51   |
| CHN2        | ENSG00000106069 | 20831.5 | 4.44   |
| NANOGP4     | ENSG00000237065 | 20831.5 | 0.495  |
| LINC00639   | ENSG00000259070 | 20719.5 | 0      |
| RAD51B      | ENSG00000182185 | 20715.5 | 10.455 |

|                |                 |         |        |
|----------------|-----------------|---------|--------|
| AARSD1         | ENSG00000266967 | 20615.5 | 35.745 |
| PTGES3L        | ENSG00000267060 | 20615.5 | 2.695  |
| PTGES3L-AARSD1 | ENSG00000108825 | 20615.5 | 0      |
| SUSD4          | ENSG00000143502 | 20506   | 1.935  |
| STAT5B         | ENSG00000173757 | 20366.5 | 18.655 |
| TOX            | ENSG00000198846 | 20328   | 0.105  |
| ENPP2          | ENSG00000136960 | 20303   | 2.06   |
| TMEM248        | ENSG00000106609 | 20293   | 52.115 |
| ATP2B2         | ENSG00000157087 | 20281   | 0.075  |
| KRT18P33       | ENSG00000214533 | 20251.5 | 0      |
| KCNQ5          | ENSG00000185760 | 20241   | 5.835  |
| KCNQ5-IT1      | ENSG00000233844 | 20241   | 0.59   |
| PGAM1P10       | ENSG00000220515 | 20241   | 0.515  |
| KNOP1P4        | ENSG00000232422 | 20241   | 0.255  |
| EXD1           | ENSG00000178997 | 20233   | 0.085  |
| GRM5           | ENSG00000168959 | 20212.5 | 0.02   |
| NOC3L          | ENSG00000173145 | 20193   | 35.14  |
| PLCE1          | ENSG00000138193 | 20193   | 4.225  |
| LHFPL4         | ENSG00000156959 | 20014   | 0.09   |
| SAMHD1         | ENSG00000101347 | 19997   | 28.91  |
| FAM53A         | ENSG00000174137 | 19937.5 | 2.1    |
| ZNF566         | ENSG00000186017 | 19934.5 | 5.075  |
| FER            | ENSG00000151422 | 19711   | 10.465 |
| LINC00971      | ENSG00000242641 | 19709   | 0      |
| CASK           | ENSG00000147044 | 19674.5 | 18.52  |
| RNU6-202P      | ENSG00000251807 | 19674.5 | 0      |
| MARVELD3       | ENSG00000140832 | 19657.5 | 1.17   |
| MAPK4          | ENSG00000141639 | 19653.5 | 1.055  |
| MAP2K5         | ENSG00000137764 | 19651.5 | 18.435 |
| HNRNPA1P5      | ENSG00000259512 | 19651.5 | 0.075  |
| ISCA1          | ENSG00000135070 | 19637.5 | 26     |
| CCDC93         | ENSG00000125633 | 19623   | 42.84  |
| SPATA5         | ENSG00000145375 | 19617   | 9.53   |
| KITLG          | ENSG00000049130 | 19600.5 | 8.35   |
| KCNIP4         | ENSG00000185774 | 19572   | 1.175  |
| USP32          | ENSG00000170832 | 19558.5 | 23.47  |
| MAPK10         | ENSG00000109339 | 19518.5 | 1.66   |
| LINC00944      | ENSG00000256128 | 19484.5 | 0      |
| PTPRR          | ENSG00000153233 | 19475.5 | 0.03   |
| SPNS2          | ENSG00000183018 | 19219.5 | 5.33   |
| CEP128         | ENSG00000100629 | 19196   | 15.92  |
| NDUFV2         | ENSG00000178127 | 19144   | 55.48  |
| ANKRD12        | ENSG00000101745 | 19144   | 13.665 |
| DENND2D        | ENSG00000162777 | 18986   | 0.175  |
| CHI3L2         | ENSG00000064886 | 18986   | 0      |
| CCDC92         | ENSG00000119242 | 18913   | 23.845 |
| DNAH10OS       | ENSG00000250091 | 18913   | 0.7    |

|           |                 |         |         |
|-----------|-----------------|---------|---------|
| LRP2      | ENSG00000081479 | 18896   | 8.28    |
| PIK3CD    | ENSG00000171608 | 18837   | 4.105   |
| ANKRD35   | ENSG00000198483 | 18823.5 | 0       |
| NAALADL2  | ENSG00000177694 | 18802.5 | 0.305   |
| ZNF536    | ENSG00000198597 | 18723.5 | 4.64    |
| SLC38A11  | ENSG00000169507 | 18652   | 0.175   |
| SP3       | ENSG00000172845 | 18642   | 29.825  |
| DEPDC5    | ENSG00000100150 | 18589   | 14.5    |
| RN7SL20P  | ENSG00000242251 | 18589   | 0.25    |
| TNPO3     | ENSG00000064419 | 18572   | 47.945  |
| CAMK1G    | ENSG00000008118 | 18519.5 | 0       |
| HDGF      | ENSG00000143321 | 18472   | 365.16  |
| PRCC      | ENSG00000143294 | 18472   | 216.59  |
| C6orf201  | ENSG00000185689 | 18398.5 | 0.895   |
| GTF3C1    | ENSG00000077235 | 18331.5 | 92.71   |
| ZSWIM7    | ENSG00000214941 | 18331.5 | 14.715  |
| ANK2      | ENSG00000145362 | 18271.5 | 11.6    |
| EIF4G3    | ENSG00000075151 | 18251   | 109.385 |
| GRM7-AS3  | ENSG00000226258 | 18248   | 0.67    |
| SAAL1     | ENSG00000166788 | 18235.5 | 47.595  |
| OLFM1     | ENSG00000130558 | 18202   | 1.02    |
| MFAP5     | ENSG00000197614 | 18090.5 | 0.05    |
| BAZ2B     | ENSG00000123636 | 18065   | 17.19   |
| STAG2     | ENSG00000101972 | 17937   | 117.565 |
| SH2D1A    | ENSG00000183918 | 17937   | 0.1     |
| ADPGK     | ENSG00000159322 | 17887   | 33.33   |
| EZR       | ENSG00000092820 | 17828   | 85.24   |
| IKZF2     | ENSG00000030419 | 17800.5 | 1.595   |
| MEGF10    | ENSG00000145794 | 17744.5 | 1.185   |
| NRXN3     | ENSG00000021645 | 17636   | 14.645  |
| SEP15     | ENSG00000183291 | 17581   | 117.25  |
| XRCC4     | ENSG00000152422 | 17460   | 8.65    |
| OFCC1     | ENSG00000181355 | 17425   | 0       |
| B3GALT1   | ENSG00000172318 | 17390.5 | 1.105   |
| ROBO1     | ENSG00000169855 | 17227.5 | 75.265  |
| RN7SL751P | ENSG00000240964 | 17227.5 | 3.285   |
| MALRD1    | ENSG00000204740 | 17203   | 0.12    |
| MTND2P16  | ENSG00000230818 | 17203   | 0       |
| SLC9A9    | ENSG00000181804 | 17199.5 | 3.445   |
| ST13P15   | ENSG00000243759 | 17199.5 | 0       |
| TOM1L1    | ENSG00000141198 | 17113.5 | 37.725  |
| C19orf10  | ENSG00000074842 | 17085   | 79.39   |
| TNFAIP8L1 | ENSG00000185361 | 17085   | 3.975   |
| CHD7      | ENSG00000171316 | 17083.5 | 58.09   |
| SLC26A6   | ENSG00000225697 | 17070.5 | 22.605  |
| PSMD1     | ENSG00000173692 | 17033.5 | 97.83   |
| HTR2B     | ENSG00000135914 | 17033.5 | 0.48    |

|           |                 |         |        |
|-----------|-----------------|---------|--------|
| ITGB6     | ENSG00000115221 | 16992.5 | 0      |
| CDKL5     | ENSG00000008086 | 16937   | 3.49   |
| GJA6P     | ENSG00000236187 | 16937   | 0.06   |
| MECOM     | ENSG00000085276 | 16820   | 19.955 |
| ERMARD    | ENSG00000130023 | 16792.5 | 7.975  |
| TACC1     | ENSG00000147526 | 16749.5 | 13.69  |
| RN7SL717P | ENSG00000240302 | 16652.5 | 0      |
| MIR1185-1 | ENSG00000221525 | 16570.5 | 0      |
| TENM1     | ENSG00000009694 | 16567   | 5.53   |
| CAMKMT    | ENSG00000143919 | 16478   | 14.38  |
| Y_RNA     | ENSG00000200344 | 16471.5 | 1.095  |
| RYR3      | ENSG00000198838 | 16471.5 | 0.9    |
| TMEM132C  | ENSG00000181234 | 16470.5 | 0      |
| NADK2     | ENSG00000152620 | 16439.5 | 19.975 |
| KIF5C     | ENSG00000168280 | 16397.5 | 9.27   |
| LMNA      | ENSG00000160789 | 16310   | 41.175 |
| SRP72     | ENSG00000174780 | 16273.5 | 133.99 |
| NUCB1     | ENSG00000104805 | 16239.5 | 63.275 |
| GOT1      | ENSG00000120053 | 16203.5 | 44.815 |
| LPO       | ENSG00000167419 | 16169.5 | 0.02   |
| KIAA1217  | ENSG00000120549 | 16108   | 2.27   |
| NMT2      | ENSG00000152465 | 15989   | 29.125 |
| INPP4B    | ENSG00000109452 | 15859.5 | 0.995  |
| RPL5P13   | ENSG00000242134 | 15859.5 | 0      |
| AFM       | ENSG00000079557 | 15730   | 0      |
| TRAF6     | ENSG00000175104 | 15696.5 | 9.985  |
| ESRP1     | ENSG00000104413 | 15660.5 | 0.285  |
| ROBO2     | ENSG00000185008 | 15625.5 | 3.975  |
| NFASC     | ENSG00000163531 | 15511.5 | 1.55   |
| TTC18     | ENSG00000156042 | 15505   | 1.34   |
| TRBC2     | ENSG00000211772 | 15504   | 0      |
| SEN5      | ENSG00000119231 | 15468   | 20.325 |
| GTF2E2    | ENSG00000197265 | 15467   | 22.35  |
| ITPKB     | ENSG00000143772 | 15443.5 | 2.63   |
| ITPKB-IT1 | ENSG00000228382 | 15443.5 | 0      |
| CTNNA3    | ENSG00000183230 | 15293.5 | 0.285  |
| SCD5      | ENSG00000145284 | 15288.5 | 13.72  |
| DNAJA3    | ENSG00000103423 | 15186   | 65.95  |
| OXR1      | ENSG00000164830 | 15172   | 14.35  |
| SLC24A2   | ENSG00000155886 | 15153   | 0.115  |
| VAT1L     | ENSG00000171724 | 15050.5 | 0.03   |
| NKAIN2    | ENSG00000188580 | 15044.5 | 0.275  |
| CCDC102A  | ENSG00000135736 | 14999.5 | 7.635  |
| TMEM196   | ENSG00000173452 | 14950.5 | 0      |
| VAV2      | ENSG00000160293 | 14902   | 9.685  |
| GRK5      | ENSG00000198873 | 14877   | 6.94   |
| GRK5-IT1  | ENSG00000228485 | 14877   | 0.515  |

|           |                 |         |        |
|-----------|-----------------|---------|--------|
| MIR4681   | ENSG00000265719 | 14877   | 0      |
| ABI1      | ENSG00000136754 | 14871.5 | 33.675 |
| ULK4      | ENSG00000168038 | 14869.5 | 3.535  |
| ERCC6L2   | ENSG00000182150 | 14853   | 33.195 |
| C4orf45   | ENSG00000164123 | 14824.5 | 0.17   |
| NHLH1     | ENSG00000171786 | 14778.5 | 0.865  |
| PLA2G16   | ENSG00000176485 | 14774.5 | 7.625  |
| ITGB1     | ENSG00000150093 | 14769   | 90.73  |
| NOL12     | ENSG00000100101 | 14727   | 48.86  |
| TRIOBP    | ENSG00000100106 | 14727   | 15.26  |
| HSP90AA1  | ENSG00000080824 | 14717.5 | 760.58 |
| APOL4     | ENSG00000100336 | 14641   | 0.24   |
| SLC24A3   | ENSG00000185052 | 14619.5 | 0      |
| ELMO2     | ENSG00000062598 | 14580   | 21.62  |
| ZNF663P   | ENSG00000215452 | 14580   | 0.04   |
| GAS7      | ENSG00000007237 | 14539.5 | 2.26   |
| CDC6      | ENSG00000094804 | 14470.5 | 59.125 |
| MTND5P18  | ENSG00000227860 | 14437.5 | 0      |
| PSMB7     | ENSG00000136930 | 14428   | 172.84 |
| TSC22D3   | ENSG00000157514 | 14427   | 131.88 |
| CNIH2     | ENSG00000174871 | 14425.5 | 5.165  |
| THUMPD3   | ENSG00000134077 | 14412   | 64.66  |
| SETD5-AS1 | ENSG00000206573 | 14412   | 32.175 |
| SRGAP3    | ENSG00000196220 | 14412   | 3.335  |
| MCC       | ENSG00000171444 | 14319   | 10.655 |
| TSSK1B    | ENSG00000212122 | 14319   | 0.05   |
| NKAIN3    | ENSG00000185942 | 14297   | 0.165  |
| TXNDC16   | ENSG00000087301 | 14292   | 8.87   |
| PCDH17    | ENSG00000118946 | 14270.5 | 3.49   |
| KNDC1     | ENSG00000171798 | 14235   | 1.48   |
| CCDC85A   | ENSG00000055813 | 14206.5 | 0.155  |
| ZC4H2     | ENSG00000126970 | 14184   | 16.66  |
| KIF26B    | ENSG00000162849 | 14145   | 2.38   |
| PGPEP1L   | ENSG00000183571 | 14136   | 0      |
| FOXP1     | ENSG00000114861 | 14100.5 | 48.39  |
| FOXP1-IT1 | ENSG00000242094 | 14100.5 | 0.625  |
| CCDC22    | ENSG00000101997 | 13980.5 | 17.37  |
| SLC22A8   | ENSG00000149452 | 13976.5 | 0.025  |
| KIAA1211L | ENSG00000196872 | 13953.5 | 0.87   |
| ADGB      | ENSG00000118492 | 13899   | 0.145  |
| DSCAM     | ENSG00000171587 | 13884.5 | 0      |
| DSCAM-IT1 | ENSG00000233756 | 13884.5 | 0      |
| BCORL1    | ENSG00000085185 | 13877.5 | 32.83  |
| MRPL48    | ENSG00000175581 | 13870   | 67.685 |
| MOCOS     | ENSG00000075643 | 13825.5 | 10.54  |
| FAM126A   | ENSG00000122591 | 13772   | 24.96  |
| STK38L    | ENSG00000211455 | 13739.5 | 34.02  |

|           |                 |         |        |
|-----------|-----------------|---------|--------|
| SRGAP2B   | ENSG00000196369 | 13719   | 72.63  |
| CDAN1     | ENSG00000140326 | 13699   | 6.5    |
| GMDS      | ENSG00000112699 | 13662   | 22.79  |
| AMDHD1    | ENSG00000139344 | 13648.5 | 0.28   |
| SAMD12    | ENSG00000177570 | 13611.5 | 1.96   |
| CNGB1     | ENSG00000070729 | 13551   | 0      |
| TRIO      | ENSG00000038382 | 13516.5 | 36.7   |
| ARHGAP24  | ENSG00000138639 | 13514.5 | 3.805  |
| KLHL12    | ENSG00000117153 | 13504   | 18.95  |
| AKAP13    | ENSG00000170776 | 13455.5 | 24.345 |
| DLG2      | ENSG00000150672 | 13455.5 | 0.675  |
| HNRNPCP6  | ENSG00000213305 | 13455.5 | 0.31   |
| LDHAL6DP  | ENSG00000250257 | 13455.5 | 0      |
| TTLL5     | ENSG00000119685 | 13426   | 37.01  |
| IFT43     | ENSG00000119650 | 13426   | 15.62  |
| FLVCR2    | ENSG00000119686 | 13426   | 1.435  |
| RNA5SP387 | ENSG00000201096 | 13426   | 0      |
| C20orf112 | ENSG00000197183 | 13409   | 6.22   |
| DDX59     | ENSG00000118197 | 13366.5 | 15.775 |
| STPG2     | ENSG00000163116 | 13356   | 0.015  |
| GFI1B     | ENSG00000165702 | 13315.5 | 0.105  |
| PDE1A     | ENSG00000115252 | 13309   | 1.07   |
| PARD6G    | ENSG00000178184 | 13280   | 5.05   |
| PTPRK     | ENSG00000152894 | 13274   | 19.065 |
| RUNX1     | ENSG00000159216 | 13253.5 | 1.695  |
| EZH2P1    | ENSG00000231300 | 13253.5 | 0      |
| RPS20P1   | ENSG00000229761 | 13253.5 | 0      |
| OMA1      | ENSG00000162600 | 13251.5 | 45.9   |
| DAB1      | ENSG00000173406 | 13251.5 | 1.145  |
| HNRNPA1P6 | ENSG00000229887 | 13251.5 | 0      |
| RPS26P15  | ENSG00000223416 | 13251.5 | 0      |
| CDC42EP3  | ENSG00000163171 | 13218.5 | 8.985  |
| SREK1     | ENSG00000153914 | 13215   | 74.71  |
| MYO10     | ENSG00000145555 | 13181.5 | 17.535 |
| ABCC8     | ENSG00000006071 | 13169   | 1.53   |
| SDHCP4    | ENSG00000255035 | 13169   | 0.545  |
| ERC1      | ENSG00000082805 | 13158   | 20.97  |
| MMAA      | ENSG00000151611 | 13158   | 1.85   |
| C17orf51  | ENSG00000212719 | 13139.5 | 32.165 |
| PDZD2     | ENSG00000133401 | 13124   | 2.865  |
| RPL5P14   | ENSG00000243914 | 13124   | 0      |
| TPT1P5    | ENSG00000214108 | 13124   | 0      |
| HMG3      | ENSG00000118418 | 13121.5 | 101.71 |
| AFTPH     | ENSG00000119844 | 13097.5 | 12.595 |
| NCF4      | ENSG00000100365 | 13002   | 0      |
| CDH10     | ENSG00000040731 | 12981   | 0.41   |
| NRIP1     | ENSG00000180530 | 12961   | 7.195  |

|           |                 |         |         |
|-----------|-----------------|---------|---------|
| RGS6      | ENSG00000182732 | 12951.5 | 0.03    |
| DGKI      | ENSG00000157680 | 12949   | 0.13    |
| DNAJB14   | ENSG00000164031 | 12935   | 14.805  |
| ANKS1B    | ENSG00000185046 | 12920   | 0.735   |
| THRB      | ENSG00000151090 | 12919.5 | 6.065   |
| THRB-IT1  | ENSG00000224822 | 12919.5 | 0.355   |
| STXBP4    | ENSG00000166263 | 12879   | 14.26   |
| NUPL2     | ENSG00000136243 | 12862   | 56.16   |
| KLHL7     | ENSG00000122550 | 12862   | 16.3    |
| AK3P3     | ENSG00000230042 | 12862   | 2.155   |
| PDE4A     | ENSG00000065989 | 12858.5 | 5.85    |
| ERC2      | ENSG00000187672 | 12821.5 | 6.295   |
| GABRA3    | ENSG00000011677 | 12756   | 0.285   |
| MIR105-2  | ENSG00000207818 | 12756   | 0       |
| MIR767    | ENSG00000211583 | 12756   | 0       |
| XIRP2     | ENSG00000163092 | 12695   | 0.02    |
| IMPG2     | ENSG00000081148 | 12692.5 | 0.08    |
| ITGB3BP   | ENSG00000142856 | 12666.5 | 77.32   |
| EFCAB7    | ENSG00000203965 | 12666.5 | 10.555  |
| DLEU2L    | ENSG00000116652 | 12666.5 | 1.215   |
| RNU7-123P | ENSG00000251720 | 12666.5 | 0       |
| LAMA2     | ENSG00000196569 | 12597   | 0.21    |
| CLVS1     | ENSG00000177182 | 12594   | 0.125   |
| GFRA2     | ENSG00000168546 | 12581   | 0.225   |
| MAST4     | ENSG00000069020 | 12555.5 | 4.29    |
| GAMTP2    | ENSG00000231910 | 12545   | 0       |
| LINC00457 | ENSG00000225179 | 12545   | 0       |
| COL14A1   | ENSG00000187955 | 12530   | 4.475   |
| IL17RB    | ENSG00000056736 | 12490   | 8.645   |
| TCIRG1    | ENSG00000110719 | 12449   | 7.085   |
| DACH1     | ENSG00000165659 | 12368.5 | 28.665  |
| PTPN11    | ENSG00000179295 | 12344.5 | 67.14   |
| ZNF569    | ENSG00000196437 | 12344   | 5.055   |
| KCNS3     | ENSG00000170745 | 12305.5 | 0.54    |
| KIAA0232  | ENSG00000170871 | 12271   | 10.98   |
| NIPAL2    | ENSG00000104361 | 12260.5 | 2.14    |
| NETO2     | ENSG00000171208 | 12252   | 40.355  |
| RBM19     | ENSG00000122965 | 12251   | 32.985  |
| FAM46A    | ENSG00000112773 | 12217.5 | 12.345  |
| HERC4     | ENSG00000148634 | 12216   | 15.055  |
| POU5F1P5  | ENSG00000236375 | 12216   | 0.895   |
| MGAT5     | ENSG00000152127 | 12213.5 | 20.405  |
| CCT2      | ENSG00000166226 | 12190   | 273.435 |
| CACNB2    | ENSG00000165995 | 12164.5 | 3.955   |
| DOCK10    | ENSG00000135905 | 12158.5 | 0.12    |
| ORC2      | ENSG00000115942 | 12156.5 | 64.65   |
| CYTH3     | ENSG00000008256 | 12106   | 17.27   |

|           |                 |         |         |
|-----------|-----------------|---------|---------|
| HDAC6     | ENSG00000094631 | 12075   | 42.035  |
| GOLGA4    | ENSG00000144674 | 12033.5 | 49.915  |
| TCEA1P2   | ENSG00000230409 | 12033.5 | 28.54   |
| MTND6P3   | ENSG00000254132 | 12000   | 8.26    |
| KIAA0825  | ENSG00000185261 | 12000   | 0.23    |
| SERTAD2   | ENSG00000179833 | 11954   | 16.535  |
| CCDC147   | ENSG00000120051 | 11943   | 0.24    |
| DDB1      | ENSG00000167986 | 11830.5 | 162.625 |
| AQP4-AS1  | ENSG00000260372 | 11800.5 | 0       |
| MYT1      | ENSG00000196132 | 11721   | 1.115   |
| SV2B      | ENSG00000185518 | 11703   | 0.015   |
| TBCEL     | ENSG00000154114 | 11682.5 | 10.895  |
| ADORA1    | ENSG00000163485 | 11671.5 | 1.36    |
| MSRA      | ENSG00000175806 | 11663.5 | 5.4     |
| GPRASP2   | ENSG00000158301 | 11635.5 | 20.79   |
| ARMCX5    | ENSG00000125962 | 11635.5 | 15.335  |
| GPRASP1   | ENSG00000198932 | 11635.5 | 1.11    |
| ADAMTS3   | ENSG00000156140 | 11635   | 3.71    |
| EPHA1     | ENSG00000146904 | 11626   | 0.44    |
| IKBKB     | ENSG00000104365 | 11593   | 27.025  |
| KIF18B    | ENSG00000186185 | 11540   | 47.76   |
| PEX14     | ENSG00000142655 | 11529   | 23.34   |
| ERBB4     | ENSG00000178568 | 11506.5 | 1.255   |
| CDH12     | ENSG00000154162 | 11505   | 0.55    |
| GBE1      | ENSG00000114480 | 11415   | 6.885   |
| ADRA1D    | ENSG00000171873 | 11411   | 0.045   |
| CNNM1     | ENSG00000119946 | 11400.5 | 3.58    |
| SORCS1    | ENSG00000108018 | 11399.5 | 0.855   |
| DPY19L2   | ENSG00000177990 | 11348   | 3.105   |
| MRE11A    | ENSG00000020922 | 11342   | 16.455  |
| GBF1      | ENSG00000107862 | 11329   | 45.71   |
| RPL29P2   | ENSG00000240480 | 11326   | 0.15    |
| DNAH2     | ENSG00000183914 | 11326   | 0.11    |
| CCDC178   | ENSG00000166960 | 11311.5 | 0.435   |
| LIMK1     | ENSG00000106683 | 11292.5 | 25.94   |
| ZNF609    | ENSG00000180357 | 11292   | 17.31   |
| TLK1      | ENSG00000198586 | 11258   | 36.795  |
| RALYL     | ENSG00000184672 | 11160.5 | 0       |
| NXPE2     | ENSG00000204361 | 11134   | 0.08    |
| BRD8      | ENSG00000112983 | 11130   | 87.42   |
| ATP8A2    | ENSG00000132932 | 11115   | 0.39    |
| RN7SL741P | ENSG00000242381 | 11115   | 0       |
| RNU6-78P  | ENSG00000199767 | 11115   | 0       |
| TEX264    | ENSG00000164081 | 11105.5 | 55.155  |
| RAD54L2   | ENSG00000164080 | 11105.5 | 30.785  |
| KAT6B     | ENSG00000156650 | 11083.5 | 17.555  |
| ABR       | ENSG00000159842 | 11071.5 | 39.835  |

|           |                 |         |         |
|-----------|-----------------|---------|---------|
| ACTG2     | ENSG00000163017 | 11003.5 | 0       |
| HIF3A     | ENSG00000124440 | 10998   | 0.1     |
| OSBPL10   | ENSG00000144645 | 10981.5 | 6.1     |
| NIFKP7    | ENSG00000251590 | 10981.5 | 0       |
| SNIP1     | ENSG00000163877 | 10966.5 | 10.69   |
| CUL4B     | ENSG00000158290 | 10947.5 | 65.51   |
| IGKJ5     | ENSG00000211593 | 10943.5 | 0       |
| KLHL6     | ENSG00000172578 | 10936   | 0.095   |
| LARGE     | ENSG00000133424 | 10900.5 | 12.135  |
| LARGE-IT1 | ENSG00000232081 | 10900.5 | 0.825   |
| SNORA76   | ENSG00000252904 | 10900.5 | 0.69    |
| CECR2     | ENSG00000099954 | 10862   | 17.385  |
| ESR1      | ENSG00000091831 | 10812.5 | 0.17    |
| KCNJ16    | ENSG00000153822 | 10784.5 | 0.015   |
| LINC01028 | ENSG00000267603 | 10784.5 | 0       |
| MYO18B    | ENSG00000133454 | 10775.5 | 0.01    |
| ACAD11    | ENSG00000240303 | 10751.5 | 25.585  |
| NPHP3     | ENSG00000113971 | 10751.5 | 13.37   |
| SCAPER    | ENSG00000140386 | 10735   | 14.445  |
| NUP210L   | ENSG00000143552 | 10692   | 0.345   |
| RNU6-179P | ENSG00000200220 | 10692   | 0       |
| GRM7      | ENSG00000196277 | 10691.5 | 0.395   |
| MIER1     | ENSG00000198160 | 10679   | 36.895  |
| UGT1A12P  | ENSG00000228949 | 10647   | 0       |
| PCBP3     | ENSG00000183570 | 10646.5 | 3.09    |
| CASC17    | ENSG00000260785 | 10640.5 | 0       |
| PMEPA1    | ENSG00000124225 | 10608.5 | 4.725   |
| ANKRD11   | ENSG00000167522 | 10573.5 | 73.285  |
| SF3B2     | ENSG00000087365 | 10554.5 | 200.675 |
| MAML3     | ENSG00000196782 | 10550.5 | 3.06    |
| RN7SKP253 | ENSG00000252233 | 10550.5 | 0       |
| DPP10     | ENSG00000175497 | 10534   | 0       |
| CRYBB2P1  | ENSG00000100058 | 10511.5 | 58.2    |
| PTPRO     | ENSG00000151490 | 10464.5 | 0.42    |
| CDON      | ENSG00000064309 | 10462   | 17.05   |
| KANSL1    | ENSG00000120071 | 10450   | 32.23   |
| FBXL18    | ENSG00000155034 | 10418   | 14.15   |
| NTRK2     | ENSG00000148053 | 10377.5 | 0.53    |
| DAK       | ENSG00000149476 | 10336.5 | 29.99   |
| CYB561A3  | ENSG00000162144 | 10336.5 | 22.665  |
| FAM129A   | ENSG00000135842 | 10326.5 | 3.02    |
| TNRC6A    | ENSG00000090905 | 10301   | 54.435  |
| STX18     | ENSG00000168818 | 10278   | 33.77   |
| FRMD4A    | ENSG00000151474 | 10278   | 8.08    |
| MIR4293   | ENSG00000266321 | 10278   | 0       |
| STX18-IT1 | ENSG00000248221 | 10278   | 0       |
| DNAI2     | ENSG00000171595 | 10251   | 0.025   |

|              |                 |          |          |
|--------------|-----------------|----------|----------|
| GPN2         | ENSG00000142751 | 10198.5  | 35.74    |
| EP300        | ENSG00000100393 | 10195.5  | 37.915   |
| CELA1        | ENSG00000139610 | 10159    | 0        |
| CBWD2        | ENSG00000136682 | 10138    | 32.985   |
| ZYG11B       | ENSG00000162378 | 10128.25 | 16.335   |
| MEGF9        | ENSG00000106780 | 10109.5  | 5.895    |
| DYM          | ENSG00000141627 | 10038.5  | 27.815   |
| PDXDC2P      | ENSG00000196696 | 9998     | 10.685   |
| TENM2        | ENSG00000145934 | 9961     | 0.015    |
| GAREM        | ENSG00000141441 | 9956     | 12.64    |
| HNRNPA1P7    | ENSG00000215492 | 9956     | 1.375    |
| ZNF76        | ENSG00000065029 | 9948     | 18.25    |
| RNF220       | ENSG00000187147 | 9924.5   | 76.035   |
| CNTNAP3B     | ENSG00000154529 | 9908.5   | 2.49     |
| MCF2L2       | ENSG00000053524 | 9897.5   | 0.785    |
| RGS22        | ENSG00000132554 | 9875     | 0        |
| ZNF471       | ENSG00000196263 | 9841.5   | 0.535    |
| CPNE4        | ENSG00000196353 | 9832.5   | 0.04     |
| MIR5704      | ENSG00000265859 | 9832.5   | 0        |
| FNTA         | ENSG00000168522 | 9831     | 44.425   |
| HOOK3        | ENSG00000168172 | 9831     | 33.93    |
| TPST2        | ENSG00000128294 | 9831     | 14.775   |
| RNU1-124P    | ENSG00000200731 | 9831     | 0.63     |
| VPS45        | ENSG00000136631 | 9793     | 33.51    |
| PDGFB        | ENSG00000100311 | 9791.5   | 0        |
| CACNA1B      | ENSG00000148408 | 9788     | 0.51     |
| KRT18P67     | ENSG00000233425 | 9780     | 0        |
| FKBP9        | ENSG00000122642 | 9763     | 16.87    |
| AVL9         | ENSG00000105778 | 9763     | 14.2     |
| DPY19L1P1    | ENSG00000229358 | 9763     | 1.29     |
| DPY19L1P2    | ENSG00000231952 | 9763     | 0.255    |
| RIMS1        | ENSG00000079841 | 9760.5   | 0.475    |
| TNIK         | ENSG00000154310 | 9758     | 22.96    |
| CCND3        | ENSG00000112576 | 9754     | 46.42    |
| GALNTL6      | ENSG00000174473 | 9730     | 3.05     |
| FBXL7        | ENSG00000183580 | 9713     | 0.04     |
| hsa-mir-6723 | ENSG00000237973 | 9711.5   | 9018.955 |
| TMEM206      | ENSG00000065600 | 9707.5   | 25.085   |
| SNX2         | ENSG00000205302 | 9675.5   | 68.68    |
| KIRREL3      | ENSG00000149571 | 9674.5   | 0.59     |
| CDH8         | ENSG00000150394 | 9652.5   | 0.755    |
| USP46        | ENSG00000109189 | 9605.5   | 20.14    |
| CSGALNACT1   | ENSG00000147408 | 9582     | 0.73     |
| CAPN14       | ENSG00000214711 | 9578.5   | 0.03     |
| TOB2         | ENSG00000183864 | 9559     | 27.235   |
| MID1         | ENSG00000101871 | 9537     | 98.01    |
| ZNF23        | ENSG00000167377 | 9511     | 6.575    |

|              |                 |        |         |
|--------------|-----------------|--------|---------|
| ZNF19        | ENSG00000157429 | 9511   | 2.045   |
| RNU6-1061P   | ENSG00000252339 | 9511   | 0       |
| BRMS1        | ENSG00000174744 | 9484   | 34.21   |
| RPL7AP66     | ENSG00000175886 | 9463   | 4.58    |
| LINC00669    | ENSG00000267374 | 9463   | 3.985   |
| GOLGA3       | ENSG00000090615 | 9461   | 39.495  |
| CHFR         | ENSG00000072609 | 9461   | 16.3    |
| ZNF605       | ENSG00000196458 | 9461   | 3.36    |
| ALOX5AP      | ENSG00000132965 | 9426.5 | 0       |
| SCML4        | ENSG00000146285 | 9412.5 | 0.025   |
| TMEM254-AS1  | ENSG00000230091 | 9388.5 | 0.22    |
| BPI          | ENSG00000101425 | 9371.5 | 0       |
| STK39        | ENSG00000198648 | 9352   | 11.615  |
| BCAS4        | ENSG00000124243 | 9339.5 | 7.925   |
| DAP3         | ENSG00000132676 | 9322.5 | 156     |
| MSTO1        | ENSG00000125459 | 9322.5 | 56.965  |
| MSTO2P       | ENSG00000203761 | 9322.5 | 9.575   |
| HNF4G        | ENSG00000164749 | 9318.5 | 2.425   |
| INSR         | ENSG00000171105 | 9233.5 | 10.595  |
| FMN2         | ENSG00000155816 | 9212   | 5.35    |
| ADH5P3       | ENSG00000223694 | 9212   | 0.17    |
| RERE         | ENSG00000142599 | 9209.5 | 46.555  |
| PRKAR1A      | ENSG00000108946 | 9202.5 | 144.495 |
| ARSG         | ENSG00000141337 | 9202.5 | 6.15    |
| ASB5         | ENSG00000164122 | 9164.5 | 0.21    |
| AFAP1        | ENSG00000196526 | 9136.5 | 8.02    |
| ATP5L        | ENSG00000167283 | 9113.5 | 319.275 |
| FUBP1        | ENSG00000162613 | 9103   | 178.665 |
| ATP8B1       | ENSG00000081923 | 9100   | 1.71    |
| UNC5D        | ENSG00000156687 | 9057.5 | 0       |
| PRUNE2       | ENSG00000106772 | 9044   | 4.17    |
| PLEKHM1P     | ENSG00000214176 | 9040   | 9.9     |
| hsa-mir-6080 | ENSG00000215769 | 9040   | 4.415   |
| FBXO18       | ENSG00000134452 | 9032.5 | 37.47   |
| H2AFY2       | ENSG00000099284 | 9029   | 44.785  |
| PLLPL        | ENSG00000102934 | 9008   | 3       |
| LAMA3        | ENSG00000053747 | 8983   | 8.005   |
| TCF7L2       | ENSG00000148737 | 8975   | 34.495  |
| PIP4K2A      | ENSG00000150867 | 8967   | 29.91   |
| ST6GALNAC3   | ENSG00000184005 | 8965   | 3.8     |
| CDH4         | ENSG00000179242 | 8957   | 0.33    |
| HPS1         | ENSG00000107521 | 8953   | 27.08   |
| JMJD1C       | ENSG00000171988 | 8939   | 12.18   |
| CAB39        | ENSG00000135932 | 8916   | 30.62   |
| USP34        | ENSG00000115464 | 8911.5 | 48.885  |
| ZNF490       | ENSG00000188033 | 8876   | 4.105   |
| ZNF564       | ENSG00000249709 | 8876   | 4.09    |

|            |                 |        |        |
|------------|-----------------|--------|--------|
| ZNF799     | ENSG00000196466 | 8876   | 2.355  |
| ZNF443     | ENSG00000180855 | 8876   | 1.825  |
| ZNF709     | ENSG00000242852 | 8876   | 1.005  |
| PGK1P2     | ENSG00000213290 | 8876   | 0.17   |
| PAK1       | ENSG00000149269 | 8855   | 39.33  |
| LITAF      | ENSG00000189067 | 8853.5 | 25.245 |
| FBXW11     | ENSG00000072803 | 8839.5 | 39.92  |
| GLB1L2     | ENSG00000149328 | 8806   | 19.05  |
| RSBN1L-AS1 | ENSG00000214293 | 8788   | 16.09  |
| SCAMP4     | ENSG00000227500 | 8777   | 58.77  |
| ADAT3      | ENSG00000213638 | 8777   | 14.57  |
| ESRRB      | ENSG00000119715 | 8734   | 3.2    |
| MYOM1      | ENSG00000101605 | 8727   | 0.305  |
| MAP3K4     | ENSG00000085511 | 8723.5 | 20.39  |
| ZDHHC13    | ENSG00000177054 | 8711.5 | 12.905 |
| LRRC37B    | ENSG00000185158 | 8698.5 | 14.885 |
| SH3GL1P1   | ENSG00000266777 | 8698.5 | 2.885  |
| PTPRD      | ENSG00000153707 | 8696   | 2.625  |
| RNF144A    | ENSG00000151692 | 8668   | 5.02   |
| CNTN5      | ENSG00000149972 | 8648.5 | 0.015  |
| RPA2P3     | ENSG00000255547 | 8648.5 | 0      |
| BASP1      | ENSG00000176788 | 8644.5 | 23.655 |
| DCAF13P2   | ENSG00000250816 | 8644.5 | 0.12   |
| SPTSSA     | ENSG00000165389 | 8643   | 9.21   |
| EGLN3      | ENSG00000129521 | 8643   | 8.975  |
| TC2N       | ENSG00000165929 | 8586.5 | 7.49   |
| CATSPERB   | ENSG00000133962 | 8586.5 | 0.655  |
| NANOGP7    | ENSG00000258774 | 8586.5 | 0      |
| RBM20      | ENSG00000203867 | 8577   | 7.92   |
| PCNX       | ENSG00000100731 | 8575   | 23.92  |
| SLC20A2    | ENSG00000168575 | 8573.5 | 30.44  |
| GIMAP2     | ENSG00000106560 | 8542.5 | 0.12   |
| TBR1       | ENSG00000136535 | 8539   | 0.205  |
| SLC4A10    | ENSG00000144290 | 8539   | 0.065  |
| KRT18P46   | ENSG00000235716 | 8539   | 0      |
| MUC3A      | ENSG00000169894 | 8516.5 | 2.285  |
| PIIP5K1    | ENSG00000168781 | 8511.5 | 20.315 |
| CATSPER2   | ENSG00000166762 | 8492.5 | 4.075  |
| STRC       | ENSG00000242866 | 8492.5 | 1.35   |
| STRCP1     | ENSG00000166763 | 8492.5 | 0.03   |
| SAMD4A     | ENSG00000020577 | 8477.5 | 6.205  |
| BDNF-AS    | ENSG00000245573 | 8474.5 | 0.355  |
| BDNF       | ENSG00000176697 | 8474.5 | 0.03   |
| TFAP2A     | ENSG00000137203 | 8434.5 | 59.655 |
| GLTP       | ENSG00000139433 | 8431.5 | 34.58  |
| ATRN       | ENSG00000088812 | 8430   | 12.475 |
| TTC4       | ENSG00000243725 | 8426.5 | 53.525 |

|                |                 |        |        |
|----------------|-----------------|--------|--------|
| MROH7          | ENSG00000184313 | 8426.5 | 0.065  |
| MROH7-TTC4     | ENSG00000271723 | 8426.5 | 0.055  |
| AMIGO1         | ENSG00000181754 | 8416   | 3.545  |
| GTPBP10        | ENSG00000105793 | 8398   | 25.525 |
| CLDN12         | ENSG00000157224 | 8398   | 21.505 |
| CDK14          | ENSG00000058091 | 8398   | 8.465  |
| TVP23CP1       | ENSG00000223584 | 8398   | 0.205  |
| FANCA          | ENSG00000187741 | 8392.5 | 64.835 |
| SFT2D1         | ENSG00000198818 | 8392   | 41.695 |
| HNRNPA1P49     | ENSG00000233231 | 8392   | 3.11   |
| KCNMA1         | ENSG00000156113 | 8384   | 0.445  |
| PVRL1          | ENSG00000110400 | 8364.5 | 10.94  |
| PEG3           | ENSG00000198300 | 8347.5 | 0      |
| ZIM2           | ENSG00000269699 | 8347.5 | 0      |
| CCDC132        | ENSG00000004766 | 8342   | 15.21  |
| VSTM4          | ENSG00000165633 | 8340   | 1.105  |
| CHRM3          | ENSG00000133019 | 8337.5 | 1.63   |
| C20orf24       | ENSG00000101084 | 8335   | 66.59  |
| TGIF2          | ENSG00000118707 | 8335   | 41.7   |
| TGIF2-C20orf24 | ENSG00000259399 | 8335   | 13.13  |
| POMGNT2        | ENSG00000144647 | 8320.5 | 18.79  |
| B4GALNT3       | ENSG00000139044 | 8317   | 12.6   |
| FUT8           | ENSG00000033170 | 8315.5 | 13.12  |
| OR2T3          | ENSG00000196539 | 8315.5 | 0      |
| NPRL3          | ENSG00000103148 | 8292.5 | 32.245 |
| PCDH7          | ENSG00000169851 | 8288   | 26.335 |
| TP53TG3C       | ENSG00000205457 | 8287   | 0.02   |
| TP53TG3B       | ENSG00000261509 | 8287   | 0      |
| OR52B1P        | ENSG00000180909 | 8278   | 0      |
| FMNL2          | ENSG00000157827 | 8276.5 | 13.275 |
| EGFEM1P        | ENSG00000206120 | 8261   | 5.155  |
| PHACTR4        | ENSG00000204138 | 8223   | 43.035 |
| RNU6ATAC27P    | ENSG00000221216 | 8223   | 5.13   |
| MEIS1          | ENSG00000143995 | 8210   | 23.9   |
| TENM4          | ENSG00000149256 | 8205.5 | 2.54   |
| GRIK4          | ENSG00000149403 | 8203   | 0.655  |
| LHFPL2         | ENSG00000145685 | 8198   | 8.76   |
| SUB1P2         | ENSG00000258737 | 8196   | 0.275  |
| VRTN           | ENSG00000133980 | 8196   | 0      |
| GUSBP1         | ENSG00000183666 | 8171.5 | 18.14  |
| TRIM13         | ENSG00000204977 | 8143.5 | 13.515 |
| KCNRG          | ENSG00000198553 | 8143.5 | 2.66   |
| RASGEF1B       | ENSG00000138670 | 8127   | 6.405  |
| UBR2           | ENSG00000024048 | 8107   | 19.675 |
| HLCS           | ENSG00000159267 | 8105.5 | 14.965 |
| HLCS-IT1       | ENSG00000237646 | 8105.5 | 0.255  |
| C10orf67       | ENSG00000179133 | 8075.5 | 0.25   |

|           |                 |        |        |
|-----------|-----------------|--------|--------|
| PKHD1L1   | ENSG00000205038 | 8066.5 | 0.005  |
| ARHGAP6   | ENSG00000047648 | 8032.5 | 0.37   |
| C1orf228  | ENSG00000198520 | 8031   | 0.45   |
| LCK       | ENSG00000182866 | 8029   | 0.07   |
| MEF2C-AS1 | ENSG00000248309 | 8015   | 0.99   |
| PLXDC2    | ENSG00000120594 | 8002   | 5.135  |
| MDM4      | ENSG00000198625 | 8001.5 | 26.68  |
| CFHR3     | ENSG00000116785 | 7990   | 0.675  |
| SEPHS1P4  | ENSG00000230146 | 7981   | 0      |
| EDARADD   | ENSG00000186197 | 7963   | 7.305  |
| IL5RA     | ENSG00000091181 | 7946.5 | 0      |
| TMEM182   | ENSG00000170417 | 7933.5 | 3.98   |
| ENTPD5    | ENSG00000187097 | 7921   | 12.9   |
| SHC4      | ENSG00000185634 | 7909   | 0.175  |
| ECT2      | ENSG00000114346 | 7871   | 60.235 |
| TMC2      | ENSG00000149488 | 7857.5 | 0.045  |
| TMEM144   | ENSG00000164124 | 7855   | 4.805  |
| FAM135B   | ENSG00000147724 | 7844.5 | 0      |
| ZNF148    | ENSG00000163848 | 7793   | 21.815 |
| SLC12A8   | ENSG00000221955 | 7793   | 2.22   |
| MYO3B     | ENSG00000071909 | 7785.5 | 0      |
| MTA3      | ENSG00000057935 | 7775   | 36.71  |
| SNX6      | ENSG00000129515 | 7772.5 | 56.315 |
| PIPOX     | ENSG00000179761 | 7755   | 0.395  |
| TFDP2     | ENSG00000114126 | 7734   | 50.29  |
| NAV2      | ENSG00000166833 | 7703   | 1.36   |
| MIR4713   | ENSG00000266593 | 7703   | 0      |
| NAV2-IT1  | ENSG00000255270 | 7703   | 0      |
| CHML      | ENSG00000203668 | 7686.5 | 19.78  |
| OPN3      | ENSG00000054277 | 7686.5 | 7.58   |
| ACOX1     | ENSG00000161533 | 7675.5 | 27.595 |
| LINC00475 | ENSG00000225511 | 7612   | 0      |
| VAMP7     | ENSG00000124333 | 7598.5 | 38.055 |
| LINC01090 | ENSG00000231689 | 7596   | 0      |
| LAMC1     | ENSG00000135862 | 7583.5 | 108.51 |
| PPM1L     | ENSG00000163590 | 7544   | 7.775  |
| SPNS3     | ENSG00000182557 | 7541.5 | 0      |
| WDR25     | ENSG00000176473 | 7529.5 | 8.72   |
| RN7SKP92  | ENSG00000253075 | 7529.5 | 0      |
| ARHGAP42  | ENSG00000165895 | 7518   | 4.06   |
| SLC6A16   | ENSG00000063127 | 7494   | 0.945  |
| CST2      | ENSG00000170369 | 7490.5 | 0      |
| PTCD3     | ENSG00000132300 | 7487   | 113.54 |
| FAM19A2   | ENSG00000198673 | 7478   | 1.435  |
| KLF17P1   | ENSG00000258316 | 7478   | 0.22   |
| ZCCHC7    | ENSG00000147905 | 7473   | 23.235 |
| FBXO42    | ENSG00000037637 | 7472   | 13.06  |

|            |                 |        |         |
|------------|-----------------|--------|---------|
| PTPRU      | ENSG00000060656 | 7454   | 25.62   |
| RFTN1      | ENSG00000131378 | 7451.5 | 6.29    |
| ERN2       | ENSG00000134398 | 7449   | 0.25    |
| CDC45      | ENSG00000093009 | 7433   | 81.275  |
| LSP1       | ENSG00000130592 | 7422   | 0.125   |
| SHFM1      | ENSG00000127922 | 7412   | 125.295 |
| C7orf76    | ENSG00000197851 | 7412   | 0       |
| C1D        | ENSG00000197223 | 7406   | 15.07   |
| MB         | ENSG00000198125 | 7398   | 0.075   |
| AP3S1      | ENSG00000177879 | 7377.5 | 58.05   |
| LRRC49     | ENSG00000137821 | 7375   | 8.795   |
| KRT8P9     | ENSG00000259470 | 7375   | 0.045   |
| NPLOC4     | ENSG00000182446 | 7373   | 83      |
| AFF3       | ENSG00000144218 | 7366.5 | 7.485   |
| TMPRSS15   | ENSG00000154646 | 7353   | 0       |
| RHCE       | ENSG00000188672 | 7348.5 | 0.105   |
| CRHR1-IT1  | ENSG00000204650 | 7346   | 42.67   |
| CRHR1      | ENSG00000120088 | 7346   | 0.9     |
| PYROXD2    | ENSG00000119943 | 7323.5 | 1.785   |
| EPSTI1     | ENSG00000133106 | 7318.5 | 1.75    |
| CA15P2     | ENSG00000234757 | 7318.5 | 0.145   |
| CA15P1     | ENSG00000241527 | 7311.5 | 0.635   |
| STARD9     | ENSG00000159433 | 7278   | 3.955   |
| CCDC144NL  | ENSG00000205212 | 7277.5 | 0.045   |
| ABHD17AP6  | ENSG00000226981 | 7277.5 | 0       |
| SGCD       | ENSG00000170624 | 7275.5 | 0       |
| CYP4F59P   | ENSG00000233244 | 7259.5 | 0       |
| LY86-AS1   | ENSG00000216863 | 7205   | 0       |
| DENND5A    | ENSG00000184014 | 7185.5 | 54.26   |
| MICU3      | ENSG00000155970 | 7159   | 4.17    |
| DMD        | ENSG00000198947 | 7158   | 6.945   |
| CENPF      | ENSG00000117724 | 7151.5 | 77.365  |
| ABHD17AP3  | ENSG00000250536 | 7151.5 | 0.47    |
| RANBP17    | ENSG00000204764 | 7145   | 10.775  |
| RN7SL623P  | ENSG00000244501 | 7145   | 0.23    |
| snoU13     | ENSG00000239166 | 7145   | 0       |
| ATG10      | ENSG00000152348 | 7123   | 4.76    |
| LRRN2      | ENSG00000170382 | 7122   | 1.73    |
| SLC30A9    | ENSG00000014824 | 7118   | 50.69   |
| ATP1B1P1   | ENSG00000249212 | 7118   | 0.84    |
| FAM95B1    | ENSG00000223839 | 7109.5 | 2.605   |
| ANKRD20A2  | ENSG00000183148 | 7109.5 | 0.435   |
| RNU6-1269P | ENSG00000212441 | 7109.5 | 0       |
| CERS6      | ENSG00000172292 | 7101.5 | 18.115  |
| CRISPLD2   | ENSG00000103196 | 7097.5 | 0.395   |
| IFRD2      | ENSG00000214706 | 7094.5 | 90.97   |
| NAT6       | ENSG00000243477 | 7094.5 | 11.515  |

|             |                 |        |        |
|-------------|-----------------|--------|--------|
| HYAL3       | ENSG00000186792 | 7094.5 | 7.795  |
| TOX3        | ENSG00000103460 | 7084   | 1.725  |
| LINC00864   | ENSG00000228055 | 7056   | 0      |
| PDS5A       | ENSG00000121892 | 7050.5 | 55.805 |
| LARP4B      | ENSG00000107929 | 7043   | 73.42  |
| USP13       | ENSG00000058056 | 7033.5 | 19.045 |
| KAT7        | ENSG00000136504 | 7010   | 49.045 |
| WDR7        | ENSG00000091157 | 7000.5 | 12.395 |
| WDR7-OT1    | ENSG00000267225 | 7000.5 | 0.225  |
| ZNF667      | ENSG00000198046 | 6998   | 0      |
| SLC8A1      | ENSG00000183023 | 6995   | 7.515  |
| TMEM132B    | ENSG00000139364 | 6977   | 0.065  |
| PRELID2     | ENSG00000186314 | 6969   | 7.715  |
| GSN         | ENSG00000148180 | 6946   | 7.57   |
| HFM1        | ENSG00000162669 | 6940.5 | 2.255  |
| SLC7A11-AS1 | ENSG00000250033 | 6930   | 0.315  |
| KHDRBS2     | ENSG00000112232 | 6921   | 0      |
| TPT1-AS1    | ENSG00000170919 | 6920.5 | 10.01  |
| RBM4        | ENSG00000173933 | 6916.5 | 137.54 |
| RBM14       | ENSG00000239306 | 6916.5 | 99.3   |
| RBM14-RBM4  | ENSG00000248643 | 6916.5 | 3.435  |
| RNMTL1      | ENSG00000171861 | 6903   | 27.27  |
| PRPS2       | ENSG00000101911 | 6888.5 | 44.85  |
| TMEM178B    | ENSG00000261115 | 6888.5 | 7.37   |
| MED12L      | ENSG00000144893 | 6868.5 | 12.415 |
| GPR171      | ENSG00000174946 | 6868.5 | 1.155  |
| SATB2       | ENSG00000119042 | 6830.5 | 32.435 |
| EFTUD1P1    | ENSG00000259404 | 6827.5 | 3.01   |
| PAFAH1B2    | ENSG00000168092 | 6815.5 | 78.28  |
| ACTG1P1     | ENSG00000178631 | 6806.5 | 0.34   |
| KIAA1244    | ENSG00000112379 | 6800.5 | 2.915  |
| RIT2        | ENSG00000152214 | 6770.5 | 0      |
| HIRA        | ENSG00000100084 | 6762   | 41.785 |
| C22orf39    | ENSG00000242259 | 6762   | 23.495 |
| C4orf40     | ENSG00000187533 | 6722   | 0.02   |
| MACROD2     | ENSG00000172264 | 6715.5 | 3.09   |
| MACROD2-IT1 | ENSG00000227927 | 6715.5 | 0.23   |
| AIMP1P1     | ENSG00000234187 | 6715.5 | 0.2    |
| EMR3        | ENSG00000131355 | 6715   | 0.03   |
| IL21-AS1    | ENSG00000227145 | 6709.5 | 0      |
| TANC2       | ENSG00000170921 | 6708.5 | 16.305 |
| JPH2        | ENSG00000149596 | 6706   | 0.03   |
| DRG2        | ENSG00000108591 | 6705   | 34.86  |
| DEPDC1B     | ENSG00000035499 | 6696   | 22.61  |
| CASS4       | ENSG00000087589 | 6673.5 | 0.195  |
| EEF1DP3     | ENSG00000229715 | 6669.5 | 0.43   |
| KCTD16      | ENSG00000183775 | 6648.5 | 0.275  |

|           |                 |         |         |
|-----------|-----------------|---------|---------|
| FYN       | ENSG00000010810 | 6643    | 83.745  |
| MKRN2     | ENSG00000075975 | 6641    | 33.52   |
| C3orf83   | ENSG00000225526 | 6641    | 1.44    |
| ARNTL     | ENSG00000133794 | 6635    | 13.085  |
| ADAMTS9   | ENSG00000163638 | 6620    | 3.33    |
| LINC01138 | ENSG00000215863 | 6608    | 12.445  |
| NF1       | ENSG00000196712 | 6602    | 23.5    |
| AK4P1     | ENSG00000263535 | 6602    | 16.365  |
| TSPAN9    | ENSG00000011105 | 6596    | 7.81    |
| SMG7      | ENSG00000116698 | 6577.5  | 68.94   |
| NCF2      | ENSG00000116701 | 6577.5  | 0.395   |
| PLCB1     | ENSG00000182621 | 6573.5  | 7.84    |
| RNU105B   | ENSG00000201348 | 6573.5  | 0.375   |
| SLC16A6   | ENSG00000108932 | 6554    | 1.21    |
| DST       | ENSG00000151914 | 6553.5  | 42.3    |
| MGMT      | ENSG00000170430 | 6550.5  | 0       |
| DMGDH     | ENSG00000132837 | 6528    | 0.425   |
| PCDH15    | ENSG00000150275 | 6505    | 0.05    |
| LMTK2     | ENSG00000164715 | 6499.5  | 12.96   |
| STX6      | ENSG00000135823 | 6491    | 22.43   |
| RBM34     | ENSG00000188739 | 6475.5  | 111.795 |
| ARID4B    | ENSG00000054267 | 6475.5  | 55.51   |
| SNCB      | ENSG00000074317 | 6475    | 4.74    |
| SLC25A21  | ENSG00000183032 | 6470    | 2.5     |
| PPP4R2    | ENSG00000163605 | 6462    | 60.86   |
| GXYLT2    | ENSG00000172986 | 6462    | 14.7    |
| EBLN2     | ENSG00000255423 | 6462    | 5.74    |
| FAT3      | ENSG00000165323 | 6446    | 2.125   |
| SH3BGR    | ENSG00000185437 | 6437.5  | 3.915   |
| RTN4      | ENSG00000115310 | 6403    | 93.445  |
| AFF2      | ENSG00000155966 | 6388.5  | 0.125   |
| FBXO21    | ENSG00000135108 | 6383    | 31.605  |
| RXFP1     | ENSG00000171509 | 6376.5  | 0       |
| MAL2      | ENSG00000147676 | 6371.5  | 0       |
| DPEP1     | ENSG00000015413 | 6356    | 0.145   |
| CHRD1     | ENSG00000101938 | 6326.5  | 1.345   |
| GOLGA2P5  | ENSG00000238105 | 6320.75 | 4.36    |
| SLC5A6    | ENSG00000138074 | 6317.5  | 46.035  |
| POLA2     | ENSG00000014138 | 6310    | 139.225 |
| DGKH      | ENSG00000102780 | 6309    | 5.305   |
| FHP1      | ENSG00000234213 | 6309    | 0       |
| APOD      | ENSG00000189058 | 6306    | 0.085   |
| SLC2A14   | ENSG00000173262 | 6303    | 0.11    |
| NEIL2     | ENSG00000154328 | 6293.5  | 5.53    |
| HS3ST2    | ENSG00000122254 | 6273    | 0       |
| KIAA1598  | ENSG00000187164 | 6272.5  | 26.23   |
| B4GALT6   | ENSG00000118276 | 6251.5  | 27.535  |

|              |                 |        |         |
|--------------|-----------------|--------|---------|
| CASC15       | ENSG00000272168 | 6251.5 | 0.03    |
| CASC14       | ENSG00000260455 | 6251.5 | 0       |
| RN7SKP240    | ENSG00000222515 | 6251.5 | 0       |
| ADAMTS19     | ENSG00000145808 | 6243   | 2.11    |
| ASPHD2       | ENSG00000128203 | 6240   | 5.865   |
| KIAA1549L    | ENSG00000110427 | 6232   | 1.72    |
| RTN4R        | ENSG00000040608 | 6224   | 3.54    |
| PLEKHM3      | ENSG00000178385 | 6215   | 6.26    |
| VTA1         | ENSG00000009844 | 6211   | 63.125  |
| VWA3B        | ENSG00000168658 | 6209.5 | 0       |
| BCR          | ENSG00000186716 | 6203   | 81.515  |
| PPP1R12B     | ENSG00000077157 | 6196.5 | 13.01   |
| NOSIP        | ENSG00000142546 | 6192   | 62.465  |
| RWDD3        | ENSG00000122481 | 6178   | 10.395  |
| TMEM56       | ENSG00000152078 | 6178   | 3.305   |
| TMEM56-RWDD3 | ENSG00000271092 | 6178   | 0.595   |
| BRPF1        | ENSG00000156983 | 6175   | 28.54   |
| SHISA9       | ENSG00000237515 | 6169.5 | 0.07    |
| CHI3L1       | ENSG00000133048 | 6157.5 | 0       |
| TTN          | ENSG00000155657 | 6115   | 1.19    |
| CCDC141      | ENSG00000163492 | 6115   | 0.44    |
| LINGO1       | ENSG00000169783 | 6109.5 | 18.01   |
| NDRG4        | ENSG00000103034 | 6096   | 15.515  |
| ICA1         | ENSG00000003147 | 6077   | 6.105   |
| NOMO1        | ENSG00000103512 | 6075.5 | 145.695 |
| PAQR3        | ENSG00000163291 | 6030   | 29.54   |
| BMP2K        | ENSG00000138756 | 6030   | 15.695  |
| RN7SL127P    | ENSG00000242175 | 6030   | 0       |
| PIK3R2       | ENSG00000105647 | 6024.5 | 57.725  |
| IFI30        | ENSG00000216490 | 6024.5 | 28.845  |
| ANKH         | ENSG00000154122 | 6017   | 18.79   |
| RBBP4P1      | ENSG00000249485 | 6017   | 1.44    |
| COA6         | ENSG00000168275 | 5988.5 | 57.215  |
| CACNA1E      | ENSG00000198216 | 5985   | 0.015   |
| BLVRB        | ENSG00000090013 | 5983   | 15.335  |
| ADAMTSL1     | ENSG00000178031 | 5957.5 | 0.15    |
| RANBP9       | ENSG00000010017 | 5939   | 33.775  |
| TPGS2        | ENSG00000134779 | 5936.5 | 215.815 |
| TLL1         | ENSG00000038295 | 5927   | 1.14    |
| AQPEP        | ENSG00000172901 | 5924   | 0.355   |
| ARL14EPL     | ENSG00000268223 | 5924   | 0       |
| C12orf5      | ENSG00000078237 | 5921   | 18.535  |
| KLHL21       | ENSG00000162413 | 5905   | 21.755  |
| AIM1         | ENSG00000112297 | 5868.5 | 0.455   |
| NTN1         | ENSG00000065320 | 5854.5 | 10.835  |
| NOMO2        | ENSG00000185164 | 5834   | 89.655  |
| EGFLAM       | ENSG00000164318 | 5831   | 0.755   |

|           |                 |        |         |
|-----------|-----------------|--------|---------|
| DCTN1     | ENSG00000204843 | 5826   | 137.03  |
| SLC4A5    | ENSG00000188687 | 5826   | 1.07    |
| KRT18P26  | ENSG00000229798 | 5826   | 0.1     |
| NOMO3     | ENSG00000103226 | 5820   | 109.72  |
| PIIG      | ENSG00000138398 | 5818.5 | 78.755  |
| NRG1      | ENSG00000157168 | 5811.5 | 0.025   |
| NRG1-IT1  | ENSG00000253974 | 5811.5 | 0       |
| NRG1-IT2  | ENSG00000253222 | 5811.5 | 0       |
| NRG1-IT3  | ENSG00000254049 | 5811.5 | 0       |
| ARHGAP10  | ENSG00000071205 | 5808.5 | 8.945   |
| RN7SL254P | ENSG00000240014 | 5808.5 | 0       |
| KCNN3     | ENSG00000143603 | 5806   | 0.38    |
| SMAP2     | ENSG00000084070 | 5776   | 36.235  |
| SH2D3C    | ENSG00000095370 | 5756   | 0.315   |
| ACYP1     | ENSG00000119640 | 5749   | 12.955  |
| GPR98     | ENSG00000164199 | 5730.5 | 3.9     |
| CNNM2     | ENSG00000148842 | 5721.5 | 10.81   |
| KCNQ1-AS1 | ENSG00000229414 | 5721.5 | 0       |
| C1orf168  | ENSG00000187889 | 5711.5 | 0.845   |
| CDK19     | ENSG00000155111 | 5700   | 12.05   |
| ZZEF1     | ENSG00000074755 | 5695   | 22.425  |
| SLC16A10  | ENSG00000112394 | 5682   | 17.235  |
| SLC43A2   | ENSG00000167703 | 5674   | 6.44    |
| UBP1      | ENSG00000153560 | 5663.5 | 104.915 |
| BDKRB2    | ENSG00000168398 | 5654.5 | 0.06    |
| BDKRB1    | ENSG00000100739 | 5654.5 | 0       |
| DOCK8     | ENSG00000107099 | 5639.5 | 1.465   |
| BID       | ENSG00000015475 | 5636.5 | 25.175  |
| STRBP     | ENSG00000165209 | 5630   | 36.92   |
| MIR600HG  | ENSG00000236901 | 5630   | 5.785   |
| FRY       | ENSG00000073910 | 5626   | 0.88    |
| MAP2K1    | ENSG00000169032 | 5622   | 60.05   |
| KCNIP1    | ENSG00000182132 | 5612   | 0.2     |
| SLC35A2   | ENSG00000102100 | 5607.5 | 21.08   |
| MDFI      | ENSG00000112559 | 5582   | 0       |
| SLCO1A2   | ENSG00000084453 | 5564   | 0.035   |
| RAPGEF6   | ENSG00000158987 | 5539   | 14.34   |
| FNIP1     | ENSG00000217128 | 5539   | 10.08   |
| C3orf67   | ENSG00000163689 | 5536.5 | 7.145   |
| STIM1     | ENSG00000167323 | 5525.5 | 17.81   |
| VAX2      | ENSG00000116035 | 5523.5 | 7.255   |
| NALCN     | ENSG00000102452 | 5521   | 0.165   |
| RALGPS2   | ENSG00000116191 | 5512.5 | 24.45   |
| MYH9      | ENSG00000100345 | 5491   | 72.145  |
| FRMPD4    | ENSG00000169933 | 5454.5 | 0.02    |
| MAD1L1    | ENSG00000002822 | 5451.5 | 23.59   |
| RPS17P2   | ENSG00000197575 | 5428.5 | 0       |

|           |                 |        |         |
|-----------|-----------------|--------|---------|
| LRFN5     | ENSG00000165379 | 5425.5 | 1.755   |
| DAGLA     | ENSG00000134780 | 5411.5 | 2.88    |
| GALNT16   | ENSG00000100626 | 5402   | 9.395   |
| TMBIM6    | ENSG00000139644 | 5399.5 | 344.735 |
| PLEKHA5   | ENSG00000052126 | 5393.5 | 16.855  |
| VGLL4     | ENSG00000144560 | 5386   | 25.44   |
| PPP2CB    | ENSG00000104695 | 5381.5 | 31.36   |
| CNTN4     | ENSG00000144619 | 5369   | 0       |
| PPP3R1    | ENSG00000221823 | 5359   | 52.9    |
| WDR92     | ENSG00000243667 | 5359   | 10.05   |
| ZCCHC2    | ENSG00000141664 | 5357   | 12.975  |
| HDGFRP2   | ENSG00000167674 | 5356   | 97.125  |
| GPR110    | ENSG00000153292 | 5342.5 | 0.06    |
| VWA1      | ENSG00000179403 | 5306.5 | 7.785   |
| HDAC5     | ENSG00000108840 | 5285   | 23.425  |
| PRR14L    | ENSG00000183530 | 5265.5 | 49.65   |
| CSRNP3    | ENSG00000178662 | 5263   | 1.23    |
| RBM5      | ENSG00000003756 | 5262   | 161.295 |
| RBM6      | ENSG00000004534 | 5262   | 71.265  |
| NTNG1     | ENSG00000162631 | 5256.5 | 0.5     |
| PCSK2     | ENSG00000125851 | 5254   | 0.025   |
| LINC00607 | ENSG00000235770 | 5244.5 | 0.03    |
| VSTM1     | ENSG00000189068 | 5229.5 | 0       |
| C9orf170  | ENSG00000204446 | 5224.5 | 0       |
| ALDH3B2   | ENSG00000132746 | 5221   | 0.14    |
| NAV1      | ENSG00000134369 | 5219.5 | 11.415  |
| IPO9-AS1  | ENSG00000231871 | 5219.5 | 5.275   |
| MTUS2     | ENSG00000132938 | 5196   | 0.26    |
| GAPDHP69  | ENSG00000223460 | 5196   | 0.065   |
| ZNF692    | ENSG00000171163 | 5175.5 | 32.065  |
| SUGT1P    | ENSG00000226823 | 5163.5 | 0.315   |
| OR6N2     | ENSG00000188340 | 5162   | 0       |
| NFIA      | ENSG00000162599 | 5158   | 27.355  |
| RNF4      | ENSG00000063978 | 5148.5 | 48.705  |
| FAM193A   | ENSG00000125386 | 5148.5 | 23.67   |
| TMEM30A   | ENSG00000112697 | 5148.5 | 19.035  |
| GALNT18   | ENSG00000110328 | 5144   | 6.52    |
| CSNK2A3   | ENSG00000254598 | 5144   | 2.085   |
| SYNE1     | ENSG00000131018 | 5143   | 8.535   |
| UBE3D     | ENSG00000118420 | 5108   | 16.46   |
| JDP2      | ENSG00000140044 | 5097.5 | 5.61    |
| WDSUB1    | ENSG00000196151 | 5081.5 | 6.045   |
| CMKLR1    | ENSG00000174600 | 5070   | 0       |
| SBF2      | ENSG00000133812 | 5065   | 18.14   |
| INPP4A    | ENSG00000040933 | 5060   | 17.58   |
| PIIP5K2   | ENSG00000145725 | 5054   | 52.585  |
| ITIH2     | ENSG00000151655 | 5048   | 0.21    |

|            |                 |        |           |
|------------|-----------------|--------|-----------|
| CSMD2      | ENSG00000121904 | 5034   | 0.01      |
| MTATP6P1   | ENSG00000248527 | 5032.5 | 19593.04  |
| MTATP8P1   | ENSG00000240409 | 5032.5 | 15045.975 |
| PARD3B     | ENSG00000116117 | 5018.5 | 4.35      |
| CDKL2      | ENSG00000138769 | 5006   | 2.48      |
| TSPAN8     | ENSG00000127324 | 5005.5 | 0.08      |
| ZCCHC11    | ENSG00000134744 | 4994.5 | 59.615    |
| LRGUK      | ENSG00000155530 | 4993   | 0.4       |
| ROR2       | ENSG00000169071 | 4972.5 | 5.045     |
| CPB1       | ENSG00000153002 | 4971   | 0.015     |
| SCFD2      | ENSG00000184178 | 4960   | 18.01     |
| TTC6       | ENSG00000139865 | 4956   | 0.53      |
| ZDHHC3     | ENSG00000163812 | 4954.5 | 55.35     |
| DCN        | ENSG00000011465 | 4954.5 | 0.12      |
| SLC39A14   | ENSG00000104635 | 4907   | 34.655    |
| PRPSAP2    | ENSG00000141127 | 4903.5 | 44.195    |
| LIN7A      | ENSG00000111052 | 4902   | 7.805     |
| SCFD1      | ENSG00000092108 | 4900.5 | 59.54     |
| KLHDC8A    | ENSG00000162873 | 4895.5 | 0.185     |
| MTND6P4    | ENSG00000249119 | 4893.5 | 1821.69   |
| PCBD2      | ENSG00000132570 | 4893.5 | 4.72      |
| CATSPER3   | ENSG00000152705 | 4893.5 | 0.735     |
| SYN2       | ENSG00000157152 | 4831.5 | 3.875     |
| ACTG1P12   | ENSG00000226642 | 4831.5 | 0.6       |
| KALP       | ENSG00000241859 | 4817.5 | 0         |
| HNRNPLL    | ENSG00000143889 | 4810.5 | 33.155    |
| DOCK2      | ENSG00000134516 | 4803   | 0.01      |
| CDH13      | ENSG00000140945 | 4782   | 0         |
| MIR3182    | ENSG00000263785 | 4782   | 0         |
| PITPNB     | ENSG00000180957 | 4780.5 | 122.815   |
| FAM21B     | ENSG00000152726 | 4773   | 0.14      |
| PLXDC1     | ENSG00000161381 | 4771   | 0.6       |
| EPRS       | ENSG00000136628 | 4765.5 | 158.565   |
| CREBRF     | ENSG00000164463 | 4764.5 | 4.015     |
| TRDMT1     | ENSG00000107614 | 4756.5 | 9.435     |
| SOX13      | ENSG00000143842 | 4742   | 13.895    |
| FHIT       | ENSG00000189283 | 4741   | 6.135     |
| U3         | ENSG00000199666 | 4741   | 0         |
| NBPF10     | ENSG00000163386 | 4716.5 | 19.825    |
| NOTCH2NL   | ENSG00000213240 | 4716.5 | 18.84     |
| WDR70      | ENSG00000082068 | 4704   | 33.05     |
| PTPRT      | ENSG00000196090 | 4701.5 | 0         |
| ENTPD1-AS1 | ENSG00000226688 | 4700.5 | 21.81     |
| ENTPD1     | ENSG00000138185 | 4700.5 | 8.615     |
| C10orf131  | ENSG00000173088 | 4700.5 | 1.075     |
| ACSBG1     | ENSG00000103740 | 4699   | 0.545     |
| AUNIP      | ENSG00000127423 | 4692   | 21.3      |

|            |                 |        |         |
|------------|-----------------|--------|---------|
| UST        | ENSG00000111962 | 4688   | 10.15   |
| COPS5      | ENSG00000121022 | 4686.5 | 46.94   |
| CSPP1      | ENSG00000104218 | 4686.5 | 23.68   |
| PPP1R42    | ENSG00000178125 | 4686.5 | 0.12    |
| EIF4BP6    | ENSG00000197258 | 4684   | 7.11    |
| LHFPL3     | ENSG00000187416 | 4684   | 0.02    |
| FGF14      | ENSG00000102466 | 4639.5 | 0       |
| FGF14-IT1  | ENSG00000243319 | 4639.5 | 0       |
| DMC1       | ENSG00000100206 | 4637   | 13.125  |
| PCDHB16    | ENSG00000196963 | 4632.5 | 0.055   |
| TEX33      | ENSG00000185264 | 4630.5 | 0       |
| AK2        | ENSG00000004455 | 4617.5 | 359.675 |
| FAM198B    | ENSG00000164125 | 4595.5 | 0.225   |
| IPO5       | ENSG00000065150 | 4574   | 137.29  |
| EXOC4      | ENSG00000131558 | 4574   | 26.22   |
| ARHGAP32   | ENSG00000134909 | 4563   | 9.27    |
| MAD2L2     | ENSG00000116670 | 4560   | 75.45   |
| MAN1A1     | ENSG00000111885 | 4557.5 | 17.395  |
| TLE6       | ENSG00000104953 | 4554   | 0.7     |
| RAB27A     | ENSG00000069974 | 4539.5 | 2.36    |
| GALK2      | ENSG00000156958 | 4537.5 | 11.58   |
| SRBD1      | ENSG00000068784 | 4532.5 | 13.44   |
| RGS8       | ENSG00000135824 | 4529   | 0       |
| CAPRIN2    | ENSG00000110888 | 4520   | 9.075   |
| MTX3       | ENSG00000177034 | 4513.5 | 12.89   |
| CCNYL1     | ENSG00000163249 | 4511.5 | 14.745  |
| ZNF418     | ENSG00000196724 | 4506   | 0.185   |
| NLN        | ENSG00000123213 | 4469.5 | 28.195  |
| NCKAP1     | ENSG00000061676 | 4467.5 | 46.99   |
| PRR12      | ENSG00000126464 | 4456   | 22.1    |
| FAM163A    | ENSG00000143340 | 4452   | 0.485   |
| PHF20L1    | ENSG00000129292 | 4445.5 | 28.97   |
| BBOX1      | ENSG00000129151 | 4443   | 0.6     |
| DEFA1B     | ENSG00000240247 | 4430.5 | 0       |
| DEFA3      | ENSG00000239839 | 4430.5 | 0       |
| ZNF503-AS2 | ENSG00000237149 | 4426   | 30.445  |
| CD99       | ENSG00000002586 | 4377.5 | 157.74  |
| RAB3C      | ENSG00000152932 | 4345   | 0.83    |
| RPL5P15    | ENSG00000240412 | 4345   | 0       |
| F5         | ENSG00000198734 | 4338   | 0.035   |
| LINC01104  | ENSG00000232084 | 4318.5 | 0       |
| TERF2      | ENSG00000132604 | 4308.5 | 56.275  |
| COG8       | ENSG00000213380 | 4308.5 | 26.775  |
| PDF        | ENSG00000258429 | 4308.5 | 24.23   |
| TMED6      | ENSG00000157315 | 4308.5 | 3.375   |
| GUSBP3     | ENSG00000253203 | 4306.5 | 6.985   |
| PTGER2     | ENSG00000125384 | 4296.5 | 1.235   |

|               |                 |        |         |
|---------------|-----------------|--------|---------|
| FAM102B       | ENSG00000162636 | 4290.5 | 7.78    |
| RALGPS1       | ENSG00000136828 | 4277   | 7.055   |
| SNX29P2       | ENSG00000198106 | 4276   | 8.505   |
| SULT1A4       | ENSG00000213648 | 4276   | 8.035   |
| SLX1B         | ENSG00000181625 | 4276   | 4.435   |
| SLX1B-SULT1A4 | ENSG00000260280 | 4276   | 0       |
| ZNF90P2       | ENSG00000233366 | 4272.5 | 0       |
| ZNF286A       | ENSG00000187607 | 4258.5 | 29.07   |
| TBC1D26       | ENSG00000214946 | 4258.5 | 0.145   |
| STIP1         | ENSG00000168439 | 4251   | 355.645 |
| NME7          | ENSG00000143156 | 4248.5 | 31.54   |
| SUDS3P1       | ENSG00000249129 | 4246.5 | 3.215   |
| GOLPH3L       | ENSG00000143457 | 4244.5 | 36.48   |
| CLDN16        | ENSG00000113946 | 4244   | 0.02    |
| USP32P3       | ENSG00000189423 | 4243   | 0.98    |
| FAM106B       | ENSG00000205217 | 4243   | 0.42    |
| FOXN3         | ENSG00000053254 | 4238   | 17.385  |
| EFCAB11       | ENSG00000140025 | 4238   | 7.175   |
| CAP2P1        | ENSG00000259151 | 4238   | 0.18    |
| RCC2          | ENSG00000179051 | 4205   | 142.915 |
| BOC           | ENSG00000144857 | 4192   | 9.615   |
| ANO6          | ENSG00000177119 | 4164   | 12.705  |
| DNAJC11       | ENSG00000007923 | 4155.5 | 63.41   |
| ARL3          | ENSG00000138175 | 4155.5 | 8.47    |
| AK5           | ENSG00000154027 | 4148   | 1.825   |
| FAM205A       | ENSG00000205108 | 4146.5 | 0.08    |
| CERKL         | ENSG00000188452 | 4146   | 1.765   |
| NEUROD1       | ENSG00000162992 | 4146   | 0.02    |
| TRANK1        | ENSG00000168016 | 4134   | 0.02    |
| GNAQ          | ENSG00000156052 | 4116   | 23.9    |
| KIF2A         | ENSG00000068796 | 4113.5 | 71.315  |
| IPO11         | ENSG00000086200 | 4113.5 | 38.425  |
| FBXO9         | ENSG00000112146 | 4110   | 122.815 |
| ICK           | ENSG00000112144 | 4110   | 7.165   |
| C15orf27      | ENSG00000169758 | 4110   | 3.45    |
| TMEM117       | ENSG00000139173 | 4106   | 4.255   |
| RAD51D        | ENSG00000185379 | 4101.5 | 8.1     |
| RFFL          | ENSG00000092871 | 4101.5 | 4.445   |
| RAD51L3-RFFL  | ENSG00000267618 | 4101.5 | 0.235   |
| ACTL8         | ENSG00000117148 | 4101   | 0.395   |
| TTLL8         | ENSG00000138892 | 4098.5 | 0       |
| PARP11        | ENSG00000111224 | 4097.5 | 4.845   |
| COL12A1       | ENSG00000111799 | 4096   | 0.21    |
| RANBP1        | ENSG00000099901 | 4095   | 629.82  |
| SMEK1         | ENSG00000100796 | 4089.5 | 83.475  |
| CCBE1         | ENSG00000183287 | 4073   | 1.88    |
| DENND1A       | ENSG00000119522 | 4069.5 | 19.095  |

|           |                 |        |         |
|-----------|-----------------|--------|---------|
| USP22     | ENSG00000124422 | 4058   | 175.415 |
| HERC5     | ENSG00000138646 | 4058   | 11.605  |
| ZDHHC15   | ENSG00000102383 | 4055   | 0.035   |
| JAK2      | ENSG00000096968 | 4048   | 1.985   |
| MTND1P11  | ENSG00000228166 | 4048   | 0.52    |
| IGHEP2    | ENSG00000254017 | 4048   | 0.15    |
| MTND6P5   | ENSG00000227730 | 4048   | 0       |
| MYPN      | ENSG00000138347 | 4046.5 | 0.09    |
| RN7SKP202 | ENSG00000222371 | 4046.5 | 0       |
| YTHDC2    | ENSG00000047188 | 4046   | 19.47   |
| FAM168A   | ENSG00000054965 | 4038   | 26.3    |
| TRAPPC9   | ENSG00000167632 | 4038   | 8.95    |
| TRIQK     | ENSG00000205133 | 4030.5 | 11.085  |
| FBXW7     | ENSG00000109670 | 4023   | 12.875  |
| PDE10A    | ENSG00000112541 | 4017.5 | 4.225   |
| LINC00473 | ENSG00000223414 | 4017.5 | 0.245   |
| SDIM1     | ENSG00000256391 | 4017.5 | 0       |
| KCNB2     | ENSG00000182674 | 4013.5 | 3.185   |
| OAZ2      | ENSG00000180304 | 4011.5 | 61.38   |
| SYN3      | ENSG00000185666 | 4009.5 | 2.675   |
| SKAP1     | ENSG00000141293 | 4008   | 0.38    |
| MIR1203   | ENSG00000221739 | 4008   | 0       |
| UBR7      | ENSG00000012963 | 4004.5 | 29.905  |
| C14orf142 | ENSG00000170270 | 4004.5 | 12.355  |
| TMEM251   | ENSG00000153485 | 4004.5 | 9.385   |
| SMC3      | ENSG00000108055 | 4003   | 73.91   |
| CLSTN2    | ENSG00000158258 | 3987.5 | 0.29    |
| STARD6    | ENSG00000174448 | 3980.5 | 0       |
| UIMC1     | ENSG00000087206 | 3979   | 35.04   |
| SYT1      | ENSG00000067715 | 3976.5 | 5.905   |
| ITCH      | ENSG00000078747 | 3970   | 27.67   |
| ITCH-IT1  | ENSG00000231795 | 3970   | 0.38    |
| FAM154A   | ENSG00000155875 | 3952   | 0.07    |
| KIAA1671  | ENSG00000197077 | 3945.5 | 15.46   |
| MLIP      | ENSG00000146147 | 3944.5 | 0.06    |
| MLIP-AS1  | ENSG00000235050 | 3944.5 | 0       |
| MLIP-IT1  | ENSG00000236996 | 3944.5 | 0       |
| RNU1-2    | ENSG00000207005 | 3937   | 29.45   |
| RNU1-4    | ENSG00000207389 | 3937   | 29.45   |
| CROCC     | ENSG00000058453 | 3937   | 15.425  |
| MST1L     | ENSG00000186715 | 3937   | 0.58    |
| U1        | ENSG00000233421 | 3937   | 0.535   |
| CROCCP4   | ENSG00000227684 | 3937   | 0.135   |
| USP12     | ENSG00000152484 | 3928.5 | 11.99   |
| NPSR1-AS1 | ENSG00000197085 | 3904.5 | 0.195   |
| NPSR1     | ENSG00000187258 | 3904.5 | 0.045   |
| NCAPD2P1  | ENSG00000230356 | 3904.5 | 0       |

|                 |                 |         |        |
|-----------------|-----------------|---------|--------|
| RPL7P31         | ENSG00000235379 | 3904.5  | 0      |
| ZFYVE28         | ENSG00000159733 | 3887.5  | 2.55   |
| BBS12           | ENSG00000181004 | 3885    | 2.005  |
| SNAP25-AS1      | ENSG00000227906 | 3883    | 0.02   |
| RPL23AP6        | ENSG00000214835 | 3883    | 0      |
| LINC00511       | ENSG00000227036 | 3874.5  | 0.93   |
| ABCC2           | ENSG00000023839 | 3871    | 0.49   |
| FAM157B         | ENSG00000233013 | 3870.75 | 0.28   |
| BAI3            | ENSG00000135298 | 3858    | 2.245  |
| LZTS1           | ENSG00000061337 | 3856    | 0.53   |
| BCL11B          | ENSG00000127152 | 3845.5  | 1.385  |
| SMG1            | ENSG00000157106 | 3820.5  | 45.905 |
| DNAH14          | ENSG00000185842 | 3820    | 52.34  |
| IMPDH1          | ENSG00000106348 | 3812    | 79.495 |
| SCN4A           | ENSG00000007314 | 3811    | 0.78   |
| VOPP1           | ENSG00000154978 | 3800    | 22.415 |
| RBFOX1          | ENSG00000078328 | 3792.5  | 0      |
| snoMe28S-Am2634 | ENSG00000251844 | 3792.5  | 0      |
| MYH7B           | ENSG00000078814 | 3787.5  | 0.7    |
| TMC1            | ENSG00000165091 | 3779.5  | 0      |
| SLC1A4          | ENSG00000115902 | 3774    | 6.75   |
| LINC00535       | ENSG00000246662 | 3769    | 0.165  |
| LRIG3           | ENSG00000139263 | 3768.5  | 20.57  |
| PKNOX1          | ENSG00000160199 | 3764.5  | 22.675 |
| KIF21A          | ENSG00000139116 | 3764    | 20.735 |
| C3orf35         | ENSG00000198590 | 3760    | 0.92   |
| DYNC1I1         | ENSG00000158560 | 3729.5  | 1.075  |
| C10orf11        | ENSG00000148655 | 3725    | 1.07   |
| DTHD1           | ENSG00000197057 | 3687    | 0      |
| CLDN1           | ENSG00000163347 | 3685.5  | 0.495  |
| HUNK            | ENSG00000142149 | 3674.5  | 4.065  |
| B3GALT5         | ENSG00000183778 | 3674    | 0.005  |
| MLLT3           | ENSG00000171843 | 3671    | 33.4   |
| SLC5A9          | ENSG00000117834 | 3657    | 0.31   |
| TSHZ2           | ENSG00000182463 | 3653.5  | 2.86   |
| EMX2OS          | ENSG00000229847 | 3652.5  | 4.03   |
| ATP9A           | ENSG00000054793 | 3646.5  | 10.1   |
| ARAP2           | ENSG00000047365 | 3636.5  | 2.565  |
| SLC9A7          | ENSG00000065923 | 3631    | 8.55   |
| PGAM1P7         | ENSG00000213997 | 3631    | 1.055  |
| DPYS            | ENSG00000147647 | 3631    | 0.055  |
| IDNK            | ENSG00000148057 | 3626.5  | 2.63   |
| CDC42BPB        | ENSG00000198752 | 3615    | 31.745 |
| PNPLA1          | ENSG00000180316 | 3610.5  | 0.08   |
| HIF1A-AS1       | ENSG00000258777 | 3607    | 0.115  |
| PHKA1           | ENSG00000067177 | 3605    | 16.53  |
| PHKA1-AS1       | ENSG00000231944 | 3605    | 0.99   |

|           |                 |         |         |
|-----------|-----------------|---------|---------|
| PLS1      | ENSG00000120756 | 3599.5  | 18.155  |
| TEX11     | ENSG00000120498 | 3585    | 0.02    |
| DOCK9     | ENSG00000088387 | 3575.5  | 17.395  |
| DHDDS     | ENSG00000117682 | 3573    | 23.6    |
| DENND2A   | ENSG00000146966 | 3572.5  | 1.76    |
| HNRNPDL3  | ENSG00000236185 | 3571    | 0       |
| NBPF16    | ENSG00000203827 | 3568.25 | 0.09    |
| SH2D6     | ENSG00000152292 | 3565    | 0.34    |
| TCF7      | ENSG00000081059 | 3552    | 17.01   |
| LINC01094 | ENSG00000251442 | 3551    | 0       |
| CA13      | ENSG00000185015 | 3550.5  | 3.35    |
| NBPF15    | ENSG00000243452 | 3532    | 33.065  |
| PDE2A     | ENSG00000186642 | 3527    | 0.68    |
| MSI2      | ENSG00000153944 | 3526    | 59.12   |
| SEPT7     | ENSG00000122545 | 3517    | 108.585 |
| KLF15     | ENSG00000163884 | 3512.5  | 9.135   |
| SPSB1     | ENSG00000171621 | 3505.5  | 3.545   |
| TBX15     | ENSG00000092607 | 3505    | 0.105   |
| ANXA4     | ENSG00000196975 | 3504.5  | 12.605  |
| TTC7B     | ENSG00000165914 | 3503.5  | 24.07   |
| FUCA1P1   | ENSG00000237053 | 3499.5  | 0       |
| LAMTOR3   | ENSG00000109270 | 3489.5  | 25.25   |
| MST1P2    | ENSG00000186301 | 3489.5  | 0.93    |
| MAGI1     | ENSG00000151276 | 3485    | 12.48   |
| MAGI1-AS1 | ENSG00000240175 | 3485    | 0.665   |
| MAGI1-IT1 | ENSG00000272610 | 3485    | 0.55    |
| KCNC4     | ENSG00000116396 | 3480    | 7.295   |
| KPNA3     | ENSG00000102753 | 3466.5  | 42.72   |
| CYFIP2    | ENSG00000055163 | 3461.5  | 34.15   |
| FAM115C   | ENSG00000170379 | 3457.5  | 0.365   |
| FAM115D   | ENSG00000159860 | 3457.5  | 0.115   |
| CTAGE6    | ENSG00000271321 | 3457.5  | 0       |
| PAICSP6   | ENSG00000241136 | 3457.5  | 0       |
| CENPC     | ENSG00000145241 | 3456.5  | 16.725  |
| WNT11     | ENSG00000085741 | 3456    | 3.525   |
| PALMD     | ENSG00000099260 | 3454    | 0.535   |
| AMMECR1   | ENSG00000101935 | 3452.5  | 16.32   |
| TPST1     | ENSG00000169902 | 3452    | 13.305  |
| ARHGAP23  | ENSG00000225485 | 3450.5  | 0.68    |
| HADHB     | ENSG00000138029 | 3449.5  | 66.305  |
| IFT80     | ENSG00000068885 | 3446.5  | 21.595  |
| TRIM59    | ENSG00000213186 | 3446.5  | 17.02   |
| FAM230A   | ENSG00000188280 | 3446    | 0.145   |
| APBB1IP   | ENSG00000077420 | 3444    | 0       |
| VPS13B    | ENSG00000132549 | 3439.5  | 8.04    |
| CLCA2     | ENSG00000137975 | 3435    | 0       |
| FIG4      | ENSG00000112367 | 3420    | 10.135  |

|           |                 |             |         |
|-----------|-----------------|-------------|---------|
| CYB561D1  | ENSG00000174151 | 3402        | 4.8     |
| MTA1      | ENSG00000182979 | 3398.5      | 147.06  |
| TEX22     | ENSG00000226174 | 3398.5      | 0.48    |
| PCNXL2    | ENSG00000135749 | 3390.5      | 21.82   |
| KREMEN1   | ENSG00000183762 | 3385        | 17.47   |
| IMMP2L    | ENSG00000184903 | 3383.5      | 3.88    |
| NRG4      | ENSG00000169752 | 3371.5      | 8.97    |
| LRRC25    | ENSG00000175489 | 3370        | 0.065   |
| KLF8      | ENSG00000102349 | 3369        | 0.125   |
| ASTN1     | ENSG00000152092 | 3365        | 0.02    |
| LRRC18    | ENSG00000165383 | 3362        | 0       |
| WDFY4     | ENSG00000128815 | 3362        | 0       |
| CLPB      | ENSG00000162129 | 3355        | 64.055  |
| FAM196B   | ENSG00000204767 | 3352        | 0.11    |
| NOX4      | ENSG00000086991 | 3344.5      | 0.015   |
| EIF3LP1   | ENSG00000258501 | 3337        | 0       |
| LCOR      | ENSG00000196233 | 3314        | 37.365  |
| SIPA1L3   | ENSG00000105738 | 3308        | 26.97   |
| RPRD1B    | ENSG00000101413 | 3283        | 36.645  |
| MKLN1     | ENSG00000128585 | 3277        | 27.89   |
| WDR64     | ENSG00000162843 | 3274        | 0.27    |
| CACNA1H   | ENSG00000196557 | 3272        | 8.06    |
| SIAH1     | ENSG00000196470 | 3271.5      | 13.48   |
| QKI       | ENSG00000112531 | 3260.5      | 105.265 |
| IL1RAPL1  | ENSG00000169306 | 3258        | 0       |
| CCDC62    | ENSG00000130783 | 3256.5      | 0.695   |
| TMEM194B  | ENSG00000189362 | 3254        | 2.555   |
| CAMK2B    | ENSG00000058404 | 3243.5      | 2.11    |
| LINC00894 | ENSG00000235703 | 3242.5      | 7.805   |
| USP32P1   | ENSG00000188933 | 3237.5      | 2.295   |
| CCDC144A  | ENSG00000170160 | 3237.5      | 0.795   |
| FAM106CP  | ENSG00000266486 | 3237.5      | 0       |
| RN7SL620P | ENSG00000265680 | 3237.5      | 0       |
| ADAM23    | ENSG00000114948 | 3233        | 7.11    |
| ERCC8     | ENSG00000049167 | 3231        | 11.34   |
| GNL3LP1   | ENSG00000215032 | 3231        | 1.75    |
| PRKCD     | ENSG00000163932 | 3230        | 21.88   |
| SOX6      | ENSG00000110693 | 3222.5      | 6.81    |
| TAB2      | ENSG00000055208 | 3203        | 59.325  |
| ACVR2A    | ENSG00000121989 | 3201.5      | 9.495   |
| MTND4P12  | ENSG00000247627 | 3196.833333 | 5423.44 |
| MTND5P11  | ENSG00000248923 | 3196.833333 | 683.11  |
| SLC35F1   | ENSG00000196376 | 3188.25     | 10.24   |
| RUNX2     | ENSG00000124813 | 3179        | 1.08    |
| HAO2      | ENSG00000116882 | 3174.5      | 0.115   |
| HAO2-IT1  | ENSG00000230921 | 3174.5      | 0       |
| SEMA5B    | ENSG00000082684 | 3173        | 0.455   |

|            |                 |        |        |
|------------|-----------------|--------|--------|
| PPM1E      | ENSG00000175175 | 3168   | 7.96   |
| CD4        | ENSG00000010610 | 3168   | 0.605  |
| CCDC97     | ENSG00000142039 | 3160.5 | 40.46  |
| TGFB1      | ENSG00000105329 | 3160.5 | 23.44  |
| BANP       | ENSG00000172530 | 3157.5 | 16.86  |
| LRCH3      | ENSG00000186001 | 3147   | 34.625 |
| MRPL33     | ENSG00000243147 | 3132.5 | 66.34  |
| BRE        | ENSG00000158019 | 3132.5 | 51.14  |
| FAM157C    | ENSG00000260528 | 3129.5 | 7.905  |
| PLCXD3     | ENSG00000182836 | 3122   | 0      |
| SGK1       | ENSG00000118515 | 3108.5 | 4.16   |
| KRT8P42    | ENSG00000220378 | 3108.5 | 0      |
| TPRG1      | ENSG00000188001 | 3108   | 0.235  |
| RRN3P2     | ENSG00000103472 | 3098   | 0.495  |
| PCSK5      | ENSG00000099139 | 3089.5 | 4.255  |
| P4HA2      | ENSG00000072682 | 3086   | 12.18  |
| PDLIM4     | ENSG00000131435 | 3086   | 8.44   |
| MROH5      | ENSG00000226807 | 3085.5 | 0      |
| ATL2       | ENSG00000119787 | 3081   | 38.44  |
| SPSB4      | ENSG00000175093 | 3071.5 | 5.72   |
| KIAA1958   | ENSG00000165185 | 3067   | 12.05  |
| NUP93      | ENSG00000102900 | 3044.5 | 90.025 |
| MYO3A      | ENSG00000095777 | 3040.5 | 2.82   |
| LRRTM4     | ENSG00000176204 | 3019   | 2.5    |
| MMP28      | ENSG00000129270 | 3012   | 0      |
| TRIM65     | ENSG00000141569 | 3007.5 | 37.2   |
| NSD1       | ENSG00000165671 | 3001.5 | 69.415 |
| IGSF1      | ENSG00000147255 | 2996   | 0.015  |
| OR11N1P    | ENSG00000185903 | 2996   | 0      |
| OR5AW1P    | ENSG00000229082 | 2996   | 0      |
| OR5BH1P    | ENSG00000242610 | 2996   | 0      |
| PIBF1      | ENSG00000083535 | 2980   | 20.79  |
| ZHX2       | ENSG00000178764 | 2965.5 | 11.575 |
| PKNOX2     | ENSG00000165495 | 2949   | 8.045  |
| ASCC2      | ENSG00000100325 | 2944   | 63.92  |
| KEL        | ENSG00000197993 | 2935.5 | 0.35   |
| BTRC       | ENSG00000166167 | 2925.5 | 16.535 |
| NFATC3     | ENSG00000072736 | 2919   | 37.98  |
| DUS2       | ENSG00000167264 | 2919   | 18.685 |
| JPH3       | ENSG00000154118 | 2904   | 6.24   |
| POLK       | ENSG00000122008 | 2901.5 | 13.395 |
| CRADD      | ENSG00000169372 | 2898   | 9.035  |
| DLGAP1     | ENSG00000170579 | 2893.5 | 0.3    |
| DLGAP1-AS5 | ENSG00000261520 | 2893.5 | 0      |
| GAPDHP66   | ENSG00000250933 | 2893.5 | 0      |
| PTPRN2     | ENSG00000155093 | 2891   | 0.015  |
| MIR153-2   | ENSG00000207960 | 2891   | 0      |

|                |                 |        |        |
|----------------|-----------------|--------|--------|
| ARMC1          | ENSG00000104442 | 2890.5 | 25.88  |
| CLDN10         | ENSG00000134873 | 2880   | 0.605  |
| F2RL1          | ENSG00000164251 | 2879   | 7.47   |
| BCAS3          | ENSG00000141376 | 2874.5 | 24.84  |
| KRT18P61       | ENSG00000267083 | 2874.5 | 0.245  |
| S1PR3          | ENSG00000213694 | 2872   | 4.325  |
| C9orf47        | ENSG00000186354 | 2872   | 0.325  |
| GRIK3          | ENSG00000163873 | 2863   | 0.02   |
| RAP2C-AS1      | ENSG00000232160 | 2859   | 1.365  |
| C2orf49        | ENSG00000135974 | 2856   | 19.87  |
| CDYL2          | ENSG00000166446 | 2850.5 | 0.27   |
| GTF2H2C        | ENSG00000183474 | 2846.5 | 78.555 |
| PDZRN3         | ENSG00000121440 | 2840   | 6.465  |
| RPGRIP1L       | ENSG00000103494 | 2826.5 | 11.5   |
| DNAJB2         | ENSG00000135924 | 2825.5 | 13.965 |
| CELSR1         | ENSG00000075275 | 2822   | 8.76   |
| SLIT3          | ENSG00000184347 | 2821   | 0.99   |
| AAK1           | ENSG00000115977 | 2817.5 | 19.93  |
| SPATS2L        | ENSG00000196141 | 2804.5 | 37.53  |
| KLHL2          | ENSG00000109466 | 2798   | 9.855  |
| HS6ST2         | ENSG00000171004 | 2792.5 | 29.4   |
| CC2D1B         | ENSG00000154222 | 2774.5 | 23.145 |
| SDK2           | ENSG00000069188 | 2774.5 | 10.61  |
| ZFYVE9         | ENSG00000157077 | 2774.5 | 9.875  |
| PDCL3P6        | ENSG00000224255 | 2774.5 | 0.705  |
| DIRC1          | ENSG00000174325 | 2766   | 0      |
| SBSPON         | ENSG00000164764 | 2763.5 | 0.82   |
| SLIT2          | ENSG00000145147 | 2754.5 | 96.795 |
| MIR218-1       | ENSG00000207732 | 2754.5 | 0      |
| ASB15          | ENSG00000146809 | 2752.5 | 0.025  |
| COLGALT1       | ENSG00000130309 | 2747.5 | 73.595 |
| TP73           | ENSG00000078900 | 2723.5 | 5.42   |
| GABRR3         | ENSG00000183185 | 2719.5 | 0.045  |
| CADPS2         | ENSG00000081803 | 2711.5 | 6.185  |
| RNF148         | ENSG00000235631 | 2711.5 | 0.455  |
| RNF133         | ENSG00000188050 | 2711.5 | 0.045  |
| TMEM110        | ENSG00000213533 | 2706.5 | 30.755 |
| TMEM110-MUSTN1 | ENSG00000248592 | 2706.5 | 4.31   |
| ITIH4          | ENSG00000055955 | 2706.5 | 3.275  |
| MUSTN1         | ENSG00000272573 | 2706.5 | 0.335  |
| GABRB1         | ENSG00000163288 | 2701   | 0      |
| SYT13          | ENSG00000019505 | 2699.5 | 0.095  |
| NBPF24         | ENSG00000203836 | 2686   | 9.42   |
| LINC00276      | ENSG00000230448 | 2657.5 | 0.145  |
| FAM157A        | ENSG00000236438 | 2656.5 | 1.1    |
| HHAT           | ENSG00000054392 | 2651.5 | 1.915  |
| CDH23          | ENSG00000107736 | 2644.5 | 2.845  |

|             |                 |        |        |
|-------------|-----------------|--------|--------|
| TXNL4B      | ENSG00000140830 | 2639.5 | 12.49  |
| GPR176      | ENSG00000166073 | 2639.5 | 5.35   |
| FSIP1       | ENSG00000150667 | 2639.5 | 0.58   |
| HPR         | ENSG00000261701 | 2639.5 | 0.57   |
| HP          | ENSG00000257017 | 2639.5 | 0.265  |
| CORO1C      | ENSG00000110880 | 2634.5 | 86.02  |
| SAP18       | ENSG00000150459 | 2633   | 194.83 |
| RRAS2       | ENSG00000133818 | 2629   | 30.085 |
| QSOX2       | ENSG00000165661 | 2627.5 | 21.065 |
| CDKAL1      | ENSG00000145996 | 2621   | 8.64   |
| CTNND2      | ENSG00000169862 | 2621   | 0.245  |
| NBPF11      | ENSG00000152042 | 2618   | 13.59  |
| ZBTB22      | ENSG00000236104 | 2615.5 | 7.59   |
| C12orf4     | ENSG00000047621 | 2604   | 18.145 |
| SRRM2       | ENSG00000167978 | 2601   | 463.01 |
| WDR34       | ENSG00000119333 | 2597.5 | 63.555 |
| MGAM        | ENSG00000257335 | 2596.5 | 0.125  |
| OR9A4       | ENSG00000258083 | 2596.5 | 0      |
| GPATCH2     | ENSG00000092978 | 2593   | 11.625 |
| ILF2        | ENSG00000143621 | 2587   | 314.03 |
| TSNAX       | ENSG00000116918 | 2583.5 | 35.09  |
| DISC1       | ENSG00000162946 | 2583.5 | 3.36   |
| DISC1-IT1   | ENSG00000226758 | 2583.5 | 0.335  |
| TSNAX-DISC1 | ENSG00000270106 | 2583.5 | 0.11   |
| BLID        | ENSG00000259571 | 2580.5 | 0      |
| KCNJ3       | ENSG00000162989 | 2579   | 0.525  |
| CEP135      | ENSG00000174799 | 2578   | 17.96  |
| KANK1       | ENSG00000107104 | 2563.5 | 8.28   |
| CACNA1D     | ENSG00000157388 | 2556   | 1.145  |
| ZFAND2A     | ENSG00000178381 | 2554.5 | 9.68   |
| ABCC11      | ENSG00000121270 | 2553   | 0.69   |
| CIB4        | ENSG00000157884 | 2550.5 | 0      |
| CCDC12      | ENSG00000160799 | 2548   | 46.11  |
| LRRC10      | ENSG00000198812 | 2545.5 | 0      |
| TEX41       | ENSG00000226674 | 2542   | 0.19   |
| CPT1C       | ENSG00000169169 | 2537   | 7.905  |
| PTPDC1      | ENSG00000158079 | 2536.5 | 6.32   |
| CYCSP24     | ENSG00000227666 | 2536.5 | 1.765  |
| EML6        | ENSG00000214595 | 2530.5 | 2.2    |
| CACNA2D3    | ENSG00000157445 | 2521.5 | 3.8    |
| RPS15P5     | ENSG00000229806 | 2521.5 | 0.41   |
| RPL12P2     | ENSG00000216412 | 2507   | 0      |
| GRPEL2      | ENSG00000164284 | 2499.5 | 25.08  |
| ANO4        | ENSG00000151572 | 2499   | 1.865  |
| LAMC2       | ENSG00000058085 | 2494.5 | 0.38   |
| TNRC18      | ENSG00000182095 | 2493   | 37.71  |
| COL23A1     | ENSG00000050767 | 2486   | 0.525  |

|           |                 |             |         |
|-----------|-----------------|-------------|---------|
| CLN6      | ENSG00000128973 | 2479.5      | 72.945  |
| CALML4    | ENSG00000129007 | 2479.5      | 22.34   |
| HMG2P40   | ENSG00000260602 | 2479.5      | 0       |
| TMTC1     | ENSG00000133687 | 2474        | 7.07    |
| MTDH      | ENSG00000147649 | 2462.5      | 186.995 |
| ANK1      | ENSG00000029534 | 2460        | 1.32    |
| CLMN      | ENSG00000165959 | 2458.75     | 4.685   |
| TTBK2     | ENSG00000128881 | 2458        | 6.565   |
| KRT8P50   | ENSG00000260799 | 2458        | 0.135   |
| FANK1     | ENSG00000203780 | 2455        | 0.35    |
| XPR1      | ENSG00000143324 | 2446.666667 | 29.745  |
| MYT1L     | ENSG00000186487 | 2445        | 0.14    |
| LARP1B    | ENSG00000138709 | 2437.5      | 30.78   |
| FOSL1P1   | ENSG00000248394 | 2437.5      | 1.325   |
| OPCML     | ENSG00000183715 | 2435.5      | 0.225   |
| OPCML-IT1 | ENSG00000254896 | 2435.5      | 0       |
| FSTL5     | ENSG00000168843 | 2434        | 0.09    |
| KDM4B     | ENSG00000127663 | 2427        | 21.64   |
| SPAG17    | ENSG00000155761 | 2418        | 1.13    |
| GLTSCR2   | ENSG00000105373 | 2412        | 108.73  |
| CHRM1     | ENSG00000168539 | 2409.5      | 0       |
| NBPF13P   | ENSG00000227242 | 2405.5      | 0.285   |
| RAB11FIP4 | ENSG00000131242 | 2396.5      | 10.18   |
| INTS4L2   | ENSG00000232270 | 2396        | 0.125   |
| OR51A7    | ENSG00000176895 | 2394.5      | 0.065   |
| MMP26     | ENSG00000167346 | 2394.5      | 0       |
| OR51A8P   | ENSG00000197984 | 2394.5      | 0       |
| OR51F2    | ENSG00000176925 | 2394.5      | 0       |
| OR51F5P   | ENSG00000272634 | 2394.5      | 0       |
| OR51H2P   | ENSG00000198217 | 2394.5      | 0       |
| OR51N1P   | ENSG00000176951 | 2394.5      | 0       |
| OR51T1    | ENSG00000176900 | 2394.5      | 0       |
| SMAD6     | ENSG00000137834 | 2385        | 32.555  |
| LINC00854 | ENSG00000236383 | 2378.5      | 4.115   |
| RXFP2     | ENSG00000133105 | 2374        | 0       |
| ZNF398    | ENSG00000197024 | 2372.5      | 34.005  |
| BNC2      | ENSG00000173068 | 2372.5      | 2.235   |
| LRRC20    | ENSG00000172731 | 2369.5      | 9.115   |
| TMTC2     | ENSG00000179104 | 2355.5      | 3.885   |
| COL24A1   | ENSG00000171502 | 2347.5      | 1.725   |
| CLOCK     | ENSG00000134852 | 2340        | 13.84   |
| ITSN2     | ENSG00000198399 | 2339        | 19.76   |
| CHST9     | ENSG00000154080 | 2325        | 0.385   |
| TCF12     | ENSG00000140262 | 2323        | 23.415  |
| ZNF675    | ENSG00000197372 | 2322        | 10.75   |
| PPFIBP2   | ENSG00000166387 | 2310.5      | 2.49    |
| ANO3      | ENSG00000134343 | 2304.5      | 0.01    |

|              |                 |        |         |
|--------------|-----------------|--------|---------|
| MARCH3       | ENSG00000173926 | 2298   | 6.2     |
| SMOC1        | ENSG00000198732 | 2296.5 | 21.305  |
| RPL36        | ENSG00000130255 | 2292   | 1089.15 |
| HSD11B1L     | ENSG00000167733 | 2292   | 5.45    |
| OTOGL        | ENSG00000165899 | 2279   | 0       |
| PLCB4        | ENSG00000101333 | 2277   | 4.115   |
| BCKDHB       | ENSG00000083123 | 2270   | 12.725  |
| ETV6         | ENSG00000139083 | 2269   | 3.275   |
| SYNJ2        | ENSG00000078269 | 2268   | 9.205   |
| SYNJ2-IT1    | ENSG00000233496 | 2268   | 0.11    |
| NELL1        | ENSG00000165973 | 2264   | 0.15    |
| MORN1        | ENSG00000116151 | 2262   | 9.78    |
| SUCO         | ENSG00000094975 | 2259   | 20.94   |
| PHRF1        | ENSG00000070047 | 2250   | 22.07   |
| KCNH1        | ENSG00000143473 | 2239.5 | 0.06    |
| IPO8P1       | ENSG00000224668 | 2239.5 | 0.025   |
| PRR14        | ENSG00000156858 | 2235.5 | 96.34   |
| ARMCX4       | ENSG00000196440 | 2229.5 | 2.265   |
| ENOX2        | ENSG00000165675 | 2221.5 | 12.885  |
| DACT3-AS1    | ENSG00000245598 | 2219.5 | 0.37    |
| TFAP2D       | ENSG00000008197 | 2219.5 | 0       |
| BMPER        | ENSG00000164619 | 2214.5 | 1.52    |
| TIMP2        | ENSG00000035862 | 2205   | 14.655  |
| DDC8         | ENSG00000178404 | 2205   | 0.695   |
| BCL3         | ENSG00000069399 | 2199   | 1.85    |
| FAM19A5      | ENSG00000219438 | 2195   | 0       |
| DCLK1        | ENSG00000133083 | 2190.5 | 1.4     |
| RNF212       | ENSG00000178222 | 2181   | 0       |
| EIF3L        | ENSG00000100129 | 2178.5 | 335.98  |
| ANKRD54      | ENSG00000100124 | 2178.5 | 27.395  |
| PCAT2        | ENSG00000253264 | 2169.5 | 0       |
| LYRM4        | ENSG00000214113 | 2158   | 23.085  |
| POTEG        | ENSG00000222036 | 2157   | 0       |
| OR4F29       | ENSG00000235249 | 2153   | 0       |
| LUZP2        | ENSG00000187398 | 2143.5 | 0.07    |
| TNFRSF10B    | ENSG00000120889 | 2142.5 | 20.445  |
| DAPK2        | ENSG00000035664 | 2142.5 | 1.055   |
| PARVA        | ENSG00000197702 | 2142   | 11.48   |
| SND1         | ENSG00000197157 | 2140.5 | 115.495 |
| DAPP1        | ENSG00000070190 | 2139.5 | 0.025   |
| POTEM        | ENSG00000187537 | 2136   | 0.055   |
| ADAM12       | ENSG00000148848 | 2135.5 | 0.055   |
| CASC4        | ENSG00000166734 | 2122.5 | 42.69   |
| DUSP22       | ENSG00000112679 | 2118.5 | 24.67   |
| RABGAP1L     | ENSG00000152061 | 2106.5 | 25.505  |
| GPR52        | ENSG00000203737 | 2106.5 | 0.72    |
| RABGAP1L-IT1 | ENSG00000223525 | 2106.5 | 0.09    |

|             |                 |        |         |
|-------------|-----------------|--------|---------|
| NAIP        | ENSG00000249437 | 2105.5 | 7.945   |
| STRIP1      | ENSG00000143093 | 2102   | 30.93   |
| HNRNPC      | ENSG00000092199 | 2098.5 | 980.72  |
| POTEH       | ENSG00000198062 | 2095   | 0       |
| RNU6-816P   | ENSG00000212216 | 2095   | 0       |
| PDCD11      | ENSG00000148843 | 2086.5 | 82.675  |
| TRRAP       | ENSG00000196367 | 2085.5 | 41.625  |
| MIR3609     | ENSG00000266019 | 2085.5 | 7.635   |
| MIR4435-1HG | ENSG00000172965 | 2076   | 9.83    |
| RPS14P4     | ENSG00000226928 | 2076   | 0       |
| ANKFN1      | ENSG00000153930 | 2075   | 0.315   |
| TXLNB       | ENSG00000164440 | 2072   | 0.45    |
| HOMER2      | ENSG00000103942 | 2069   | 32.335  |
| FAM103A1    | ENSG00000169612 | 2069   | 13.86   |
| SLC17A7     | ENSG00000104888 | 2063   | 1.205   |
| FAM153B     | ENSG00000182230 | 2053.5 | 0.16    |
| NUTM2A-AS1  | ENSG00000223482 | 2053   | 39.23   |
| DOCK3       | ENSG00000088538 | 2052.5 | 5.6     |
| OIP5        | ENSG00000104147 | 2048.5 | 17.56   |
| KIAA1239    | ENSG00000174145 | 2045.5 | 0.065   |
| SBNO2       | ENSG00000064932 | 2044   | 21.97   |
| OTOA        | ENSG00000155719 | 2044   | 0.035   |
| LINGO2      | ENSG00000174482 | 2041.5 | 0.02    |
| YTHDF1      | ENSG00000149658 | 2034   | 39.38   |
| FGF10       | ENSG00000070193 | 2021.5 | 0       |
| CNTNAP2     | ENSG00000174469 | 2020   | 9.88    |
| CIZ1        | ENSG00000148337 | 2010   | 162.905 |
| FBXL17      | ENSG00000145743 | 2007.5 | 5.08    |
| POLR2J3     | ENSG00000168255 | 1994   | 225.27  |
| UPK3BL      | ENSG00000267368 | 1994   | 10.315  |
| POLR2J2     | ENSG00000228049 | 1994   | 5.175   |
| RASA4       | ENSG00000105808 | 1994   | 3.065   |
| RASA4B      | ENSG00000170667 | 1994   | 1.74    |
| ARHGEF28    | ENSG00000214944 | 1993   | 1.97    |
| TSKS        | ENSG00000126467 | 1984.5 | 0.215   |
| ADK         | ENSG00000156110 | 1979.5 | 29.425  |
| MRPL35P3    | ENSG00000226253 | 1979.5 | 2.965   |
| RPSAP6      | ENSG00000214629 | 1979.5 | 0.7     |
| POLR3DP1    | ENSG00000214626 | 1979.5 | 0.375   |
| SMYD3       | ENSG00000185420 | 1978   | 16.88   |
| SMYD3-IT1   | ENSG00000230184 | 1978   | 0.19    |
| UNKL        | ENSG00000059145 | 1977   | 33.055  |
| STXBP5      | ENSG00000164506 | 1975   | 10.655  |
| KCNH7       | ENSG00000184611 | 1972   | 0.05    |
| FANCD2OS    | ENSG00000163705 | 1971   | 2.135   |
| USB1        | ENSG00000103005 | 1960   | 54.86   |
| KANK4       | ENSG00000132854 | 1960   | 0.08    |

|             |                 |        |         |
|-------------|-----------------|--------|---------|
| KCTD10      | ENSG00000110906 | 1953   | 39.55   |
| ENAH        | ENSG00000154380 | 1949.5 | 200.005 |
| FAM153A     | ENSG00000170074 | 1949.5 | 0.12    |
| GREB1L      | ENSG00000141449 | 1940   | 24.73   |
| KCTD9P2     | ENSG00000181819 | 1939.5 | 0.14    |
| IL1RAPL2    | ENSG00000189108 | 1939.5 | 0       |
| TUBBP6      | ENSG00000235207 | 1936.5 | 0.05    |
| PPL         | ENSG00000118898 | 1930.5 | 1.005   |
| IQCJ-SCHIP1 | ENSG00000250588 | 1922   | 7.82    |
| SCHIP1      | ENSG00000151967 | 1922   | 6.71    |
| IQCJ        | ENSG00000214216 | 1922   | 0       |
| SH3RF3      | ENSG00000172985 | 1911   | 9.05    |
| PLIN3       | ENSG00000105355 | 1910.5 | 23.77   |
| LOXL3       | ENSG00000115318 | 1904   | 4.855   |
| C15orf41    | ENSG00000186073 | 1894   | 8.655   |
| LARP4P      | ENSG00000261315 | 1894   | 0.33    |
| CSNK1A1P1   | ENSG00000223518 | 1894   | 0.175   |
| C22orf34    | ENSG00000188511 | 1888   | 0       |
| GLCCI1      | ENSG00000106415 | 1887   | 18.155  |
| RHPN2       | ENSG00000131941 | 1887   | 15.58   |
| RPA3-AS1    | ENSG00000219545 | 1887   | 15.47   |
| H3F3AP4     | ENSG00000235655 | 1883.5 | 670.805 |
| MAST2       | ENSG00000086015 | 1882.5 | 21.155  |
| FANCI       | ENSG00000140525 | 1873   | 85.12   |
| SVIL        | ENSG00000197321 | 1873   | 3.735   |
| GLP2R       | ENSG00000065325 | 1871.5 | 0       |
| ADCY2       | ENSG00000078295 | 1868   | 0.035   |
| GANC        | ENSG00000214013 | 1864.5 | 5.355   |
| CAPN3       | ENSG00000092529 | 1864.5 | 0.64    |
| SLC16A1     | ENSG00000155380 | 1859   | 142.805 |
| AKR7A2P1    | ENSG00000229020 | 1859   | 1.045   |
| LUM         | ENSG00000139329 | 1858   | 0.995   |
| IQCF2       | ENSG00000184345 | 1851   | 0.115   |
| VMP1        | ENSG00000062716 | 1843.5 | 63.915  |
| ZAN         | ENSG00000146839 | 1838.5 | 0.015   |
| SMURF2      | ENSG00000108854 | 1835   | 21.58   |
| EPHA4       | ENSG00000116106 | 1831   | 24.205  |
| RORA        | ENSG00000069667 | 1830.5 | 5.89    |
| AGPS        | ENSG00000018510 | 1822   | 28.345  |
| PTCHD4      | ENSG00000244694 | 1818   | 0.06    |
| HSD17B12    | ENSG00000149084 | 1814   | 100.73  |
| HIVEP2      | ENSG00000010818 | 1814   | 5.55    |
| MIR670HG    | ENSG00000235661 | 1814   | 0       |
| SNX8        | ENSG00000106266 | 1812   | 23.655  |
| PRKCA       | ENSG00000154229 | 1811.5 | 11.43   |
| RNU6-928P   | ENSG00000252685 | 1811.5 | 0       |
| SNX29       | ENSG00000048471 | 1807.5 | 7.005   |

|            |                 |         |        |
|------------|-----------------|---------|--------|
| RPS23P6    | ENSG00000241641 | 1807.5  | 0      |
| AUTS2      | ENSG00000158321 | 1804    | 88.17  |
| CNR1       | ENSG00000118432 | 1800.5  | 0.215  |
| CD6        | ENSG00000013725 | 1791.5  | 0      |
| ANO2       | ENSG00000047617 | 1791    | 0.24   |
| NHLRC2     | ENSG00000196865 | 1784    | 10.785 |
| TNFSF11    | ENSG00000120659 | 1780.5  | 0.03   |
| SMG6       | ENSG00000070366 | 1778    | 18.665 |
| SYNPR      | ENSG00000163630 | 1772.5  | 0.095  |
| SYNPR-AS1  | ENSG00000241359 | 1772.5  | 0      |
| PPP3CA     | ENSG00000138814 | 1768    | 37.48  |
| NSUN2      | ENSG00000037474 | 1763.5  | 82.525 |
| HBE1       | ENSG00000213931 | 1762.5  | 0.115  |
| HBG2       | ENSG00000196565 | 1762.5  | 0.085  |
| OR52V1P    | ENSG00000249633 | 1762.5  | 0.07   |
| OR51B2     | ENSG00000184881 | 1762.5  | 0      |
| OR51B3P    | ENSG00000223735 | 1762.5  | 0      |
| OR51B4     | ENSG00000183251 | 1762.5  | 0      |
| OR51B8P    | ENSG00000236359 | 1762.5  | 0      |
| OR51I1     | ENSG00000167359 | 1762.5  | 0      |
| OR51K1P    | ENSG00000248424 | 1762.5  | 0      |
| OR52H2P    | ENSG00000248553 | 1762.5  | 0      |
| UBQLN3     | ENSG00000175520 | 1762.5  | 0      |
| UBQLNL     | ENSG00000175518 | 1762.5  | 0      |
| NFYB       | ENSG00000120837 | 1760.5  | 27.02  |
| GNG4       | ENSG00000168243 | 1760.5  | 15.625 |
| MAGEA4     | ENSG00000147381 | 1757.5  | 0      |
| TPTE2P6    | ENSG00000205822 | 1755    | 0.375  |
| MAG        | ENSG00000105695 | 1751.5  | 0      |
| KLF12      | ENSG00000118922 | 1748.5  | 18.7   |
| CAMK4      | ENSG00000152495 | 1746.5  | 5.735  |
| SLC8A1-AS1 | ENSG00000227028 | 1744.5  | 1.945  |
| GATAD2B    | ENSG00000143614 | 1744    | 31.475 |
| PIP5KL1    | ENSG00000167103 | 1742.25 | 1.375  |
| ZNF863P    | ENSG00000236538 | 1740    | 0      |
| LIX1L      | ENSG00000152022 | 1737.5  | 21.93  |
| WDFY3      | ENSG00000163625 | 1735    | 25.84  |
| POLR2J4    | ENSG00000214783 | 1735    | 5.045  |
| UFL1       | ENSG00000014123 | 1729    | 10.48  |
| TRAK1      | ENSG00000182606 | 1727    | 23.07  |
| IDH2       | ENSG00000182054 | 1725    | 36.055 |
| TMX4       | ENSG00000125827 | 1715    | 16.46  |
| LACE1      | ENSG00000135537 | 1703    | 6.48   |
| CTNNB1     | ENSG00000168036 | 1700.5  | 213.9  |
| CXorf66    | ENSG00000203933 | 1700    | 0      |
| MPRIIP     | ENSG00000133030 | 1688.5  | 108.62 |
| PARK2      | ENSG00000185345 | 1686.5  | 0.375  |

|           |                 |         |         |
|-----------|-----------------|---------|---------|
| SOD2      | ENSG00000112096 | 1684    | 96.41   |
| HNRNPH1P1 | ENSG00000220305 | 1684    | 2.82    |
| DACH2     | ENSG00000126733 | 1683    | 0.705   |
| GEMIN8P3  | ENSG00000223772 | 1683    | 0       |
| METTL13   | ENSG00000010165 | 1681.5  | 37.985  |
| C1orf21   | ENSG00000116667 | 1681.5  | 19.405  |
| RN7SL832P | ENSG00000243819 | 1681.5  | 1.485   |
| FCGR2A    | ENSG00000143226 | 1678.5  | 1       |
| HSPA7     | ENSG00000225217 | 1678.5  | 0.095   |
| HSPA6     | ENSG00000173110 | 1678.5  | 0.045   |
| FCGR2B    | ENSG00000072694 | 1678.5  | 0.03    |
| FCGR2C    | ENSG00000244682 | 1678.5  | 0       |
| FCGR3A    | ENSG00000203747 | 1678.5  | 0       |
| FCGR3B    | ENSG00000162747 | 1678.5  | 0       |
| RPS23P9   | ENSG00000231586 | 1678.5  | 0       |
| ARHGAP22  | ENSG00000128805 | 1677    | 10.05   |
| SMARCC1   | ENSG00000173473 | 1666.5  | 149.755 |
| TSNARE1   | ENSG00000171045 | 1659    | 5.32    |
| KLHL32    | ENSG00000186231 | 1658    | 0.955   |
| KLF17     | ENSG00000171872 | 1654.5  | 0       |
| CDHR2     | ENSG00000074276 | 1653    | 1.305   |
| IGF1R     | ENSG00000140443 | 1652    | 30.77   |
| PPARG     | ENSG00000132170 | 1634.5  | 16.78   |
| IGDCC3    | ENSG00000174498 | 1633.5  | 4.14    |
| IARS2     | ENSG00000067704 | 1627.5  | 98.03   |
| NGRN      | ENSG00000182768 | 1624.5  | 73.835  |
| TTLL13    | ENSG00000213471 | 1624.5  | 0.355   |
| AXIN1     | ENSG00000103126 | 1624    | 21.44   |
| GARNL3    | ENSG00000136895 | 1620    | 12.54   |
| PRKAR1B   | ENSG00000188191 | 1616.5  | 16.975  |
| DNAH10    | ENSG00000197653 | 1615    | 1.36    |
| COX8A     | ENSG00000176340 | 1610    | 282.145 |
| OTUB1     | ENSG00000167770 | 1610    | 96.57   |
| MACROD1   | ENSG00000133315 | 1610    | 24.035  |
| PDZK1IP1  | ENSG00000162366 | 1609.5  | 0       |
| DLG5      | ENSG00000151208 | 1608.5  | 21.58   |
| CADM3     | ENSG00000162706 | 1608.5  | 0       |
| DARC      | ENSG00000213088 | 1608.5  | 0       |
| LINC00856 | ENSG00000230417 | 1586    | 0.155   |
| LINC00595 | ENSG00000227136 | 1586    | 0       |
| CCSER1    | ENSG00000184305 | 1585.5  | 3.195   |
| IL18R1    | ENSG00000115604 | 1574    | 1.51    |
| IL1RL1    | ENSG00000115602 | 1574    | 0       |
| MYO1D     | ENSG00000176658 | 1572    | 14.41   |
| BFSP1     | ENSG00000125864 | 1567.5  | 2.285   |
| ADD2      | ENSG00000075340 | 1566    | 23.285  |
| CIPC      | ENSG00000198894 | 1565.25 | 15.015  |

|            |                 |         |        |
|------------|-----------------|---------|--------|
| TMEM63C    | ENSG00000165548 | 1565.25 | 2.715  |
| MTF1       | ENSG00000188786 | 1555.5  | 7.95   |
| MRPS33P4   | ENSG00000234821 | 1553.5  | 0      |
| CPQ        | ENSG00000104324 | 1550    | 1.87   |
| MSR1       | ENSG00000038945 | 1545    | 0.14   |
| CELF2      | ENSG00000048740 | 1542    | 6.38   |
| CBX5       | ENSG00000094916 | 1540    | 68.395 |
| RN7SL390P  | ENSG00000241785 | 1540    | 0.26   |
| P2RY10     | ENSG00000078589 | 1528.5  | 0      |
| TRPM1      | ENSG00000134160 | 1525    | 0.04   |
| LPAL2      | ENSG00000213071 | 1523    | 0.185  |
| ANKRD17    | ENSG00000132466 | 1522.5  | 71.76  |
| TSPAN7     | ENSG00000156298 | 1521    | 11.55  |
| PRRG1      | ENSG00000130962 | 1521    | 10.515 |
| XK         | ENSG00000047597 | 1521    | 1.7    |
| SYTL5      | ENSG00000147041 | 1521    | 1.635  |
| CYBB       | ENSG00000165168 | 1521    | 0.24   |
| LANCL3     | ENSG00000147036 | 1521    | 0.13   |
| OTC        | ENSG00000036473 | 1521    | 0.04   |
| TM4SF2     | ENSG00000250349 | 1521    | 0      |
| CASKIN1    | ENSG00000167971 | 1519    | 3.415  |
| DGCR5      | ENSG00000237517 | 1517    | 3.345  |
| DGCR9      | ENSG00000273032 | 1517    | 0.64   |
| APOL3      | ENSG00000128284 | 1514.5  | 0      |
| SCAMP5     | ENSG00000198794 | 1508    | 9.705  |
| BRIP1      | ENSG00000136492 | 1507    | 17.29  |
| SPATA6L    | ENSG00000106686 | 1506.5  | 0.82   |
| ANXA13     | ENSG00000104537 | 1502    | 0      |
| ANKRD26    | ENSG00000107890 | 1501    | 13.77  |
| CENPP      | ENSG00000188312 | 1496.5  | 4.57   |
| ECM2       | ENSG00000106823 | 1496.5  | 0.96   |
| LRPPRC     | ENSG00000138095 | 1496    | 151.78 |
| SREBF2     | ENSG00000198911 | 1495.5  | 44.335 |
| RSPRY1     | ENSG00000159579 | 1495.5  | 29.915 |
| AARS2      | ENSG00000124608 | 1494    | 20.525 |
| TMEM151B   | ENSG00000178233 | 1494    | 0.445  |
| SPATS1     | ENSG00000249481 | 1494    | 0      |
| WDR27      | ENSG00000184465 | 1492.5  | 34.03  |
| LINC01010  | ENSG00000236700 | 1491.5  | 0      |
| PSMA2P3    | ENSG00000227890 | 1484.5  | 0.095  |
| PFAS       | ENSG00000178921 | 1483.5  | 54.12  |
| TDP1       | ENSG00000042088 | 1475.5  | 25.58  |
| KCNJ12     | ENSG00000184185 | 1474    | 4.62   |
| RYR2       | ENSG00000198626 | 1473.5  | 0.33   |
| ANKRD20A5P | ENSG00000186481 | 1467.5  | 4.785  |
| CDK11A     | ENSG00000008128 | 1465.5  | 50.46  |
| SLC35E2    | ENSG00000215790 | 1465.5  | 5.775  |

|           |                 |        |         |
|-----------|-----------------|--------|---------|
| NDUFA9    | ENSG00000139180 | 1461   | 62.945  |
| DYRK4     | ENSG00000010219 | 1461   | 26.07   |
| GALNT8    | ENSG00000130035 | 1461   | 0.24    |
| KCNA6     | ENSG00000151079 | 1461   | 0.16    |
| FBLIM1    | ENSG00000162458 | 1460   | 12.74   |
| IPP       | ENSG00000197429 | 1459   | 5.885   |
| LINC00499 | ENSG00000251372 | 1455.5 | 0       |
| ADCK3     | ENSG00000163050 | 1454.5 | 53.6    |
| CDK11B    | ENSG00000248333 | 1453   | 38.615  |
| DRAXIN    | ENSG00000162490 | 1452.5 | 0.035   |
| LEPROT    | ENSG00000213625 | 1448.5 | 17.735  |
| LEPR      | ENSG00000116678 | 1448.5 | 6.205   |
| C2orf70   | ENSG00000173557 | 1448.5 | 0       |
| FGF1      | ENSG00000113578 | 1445   | 0       |
| RPS12P10  | ENSG00000225147 | 1445   | 0       |
| NIN       | ENSG00000100503 | 1438   | 38.19   |
| PROS1     | ENSG00000184500 | 1437.5 | 7.845   |
| FLRT1     | ENSG00000126500 | 1433.5 | 1.075   |
| NALCN-AS1 | ENSG00000233009 | 1429.5 | 0       |
| RGS10     | ENSG00000148908 | 1426.5 | 21.63   |
| NPAT      | ENSG00000149308 | 1421.5 | 24.685  |
| NR4A3     | ENSG00000119508 | 1418.5 | 1.285   |
| LINC00922 | ENSG00000261742 | 1418.5 | 0       |
| TIMM10B   | ENSG00000132286 | 1417   | 21.57   |
| DNHD1     | ENSG00000179532 | 1417   | 6.595   |
| FOXK2     | ENSG00000141568 | 1416   | 80.195  |
| WDR45B    | ENSG00000141580 | 1416   | 68.51   |
| LEKR1     | ENSG00000197980 | 1411.5 | 0.545   |
| WBSCR17   | ENSG00000185274 | 1411   | 0       |
| TUBGCP6   | ENSG00000128159 | 1408.5 | 24.215  |
| SELO      | ENSG00000073169 | 1408.5 | 16.3    |
| LINC00298 | ENSG00000235665 | 1408.5 | 0       |
| LINC00299 | ENSG00000236790 | 1408.5 | 0       |
| NOL3      | ENSG00000140939 | 1408   | 6.775   |
| CES5A     | ENSG00000159398 | 1408   | 0       |
| XAGE3     | ENSG00000171402 | 1405   | 0       |
| CASC2     | ENSG00000177640 | 1401   | 3.21    |
| DCT       | ENSG00000080166 | 1401   | 0.095   |
| PRKAR2A   | ENSG00000114302 | 1398   | 106.355 |
| RIOK2     | ENSG00000058729 | 1393.5 | 36.14   |
| AGAP1     | ENSG00000157985 | 1393   | 17.075  |
| ESCO1     | ENSG00000141446 | 1391   | 22.985  |
| SCARA3    | ENSG00000168077 | 1383.5 | 2.95    |
| TTC34     | ENSG00000215912 | 1382   | 0.4     |
| MPP6      | ENSG00000105926 | 1377.5 | 23.7    |
| MYOCD     | ENSG00000141052 | 1372.5 | 0       |
| TRIM5     | ENSG00000132256 | 1371   | 2.765   |

|             |                 |        |        |
|-------------|-----------------|--------|--------|
| OR52E6      | ENSG00000205409 | 1371   | 0      |
| OR52E8      | ENSG00000183269 | 1371   | 0      |
| OR52N1      | ENSG00000181001 | 1371   | 0      |
| PER2        | ENSG00000132326 | 1369.5 | 3.175  |
| KIR2DL1     | ENSG00000125498 | 1368.5 | 0      |
| KIR2DL3     | ENSG00000243772 | 1368.5 | 0      |
| KIR2DL4     | ENSG00000189013 | 1368.5 | 0      |
| KIR2DP1     | ENSG00000242473 | 1368.5 | 0      |
| KIR2DS4     | ENSG00000221957 | 1368.5 | 0      |
| KIR3DL1     | ENSG00000167633 | 1368.5 | 0      |
| KIR3DL2     | ENSG00000240403 | 1368.5 | 0      |
| KIR3DL3     | ENSG00000242019 | 1368.5 | 0      |
| KIR3DP1     | ENSG00000264257 | 1368.5 | 0      |
| HAUS4       | ENSG00000092036 | 1365   | 18.8   |
| AJUBA       | ENSG00000129474 | 1365   | 5.42   |
| CACNA1C     | ENSG00000151067 | 1361   | 1.405  |
| CACNA1C-IT3 | ENSG00000256721 | 1361   | 0.105  |
| CPNE6       | ENSG00000100884 | 1358.5 | 0.13   |
| SPATS2      | ENSG00000123352 | 1358   | 38.685 |
| GLG1        | ENSG00000090863 | 1357.5 | 41.42  |
| ZNF737      | ENSG00000237440 | 1357   | 0.475  |
| ZNF626      | ENSG00000188171 | 1357   | 0      |
| SCN3B       | ENSG00000166257 | 1353.5 | 0.595  |
| CHEK2       | ENSG00000183765 | 1353   | 37.01  |
| SUPT3H      | ENSG00000196284 | 1348.5 | 8.34   |
| PHLDB1      | ENSG00000019144 | 1345.5 | 11.8   |
| KRT6B       | ENSG00000185479 | 1344.5 | 0.025  |
| UBQLN4      | ENSG00000160803 | 1340.5 | 68.735 |
| PRDM16      | ENSG00000142611 | 1339   | 7.295  |
| MYO1E       | ENSG00000157483 | 1337.5 | 18.935 |
| ASB8        | ENSG00000177981 | 1330   | 24.595 |
| CSMD1       | ENSG00000183117 | 1330   | 0.01   |
| PPP1CB      | ENSG00000213639 | 1329.5 | 63.575 |
| SPDYA       | ENSG00000163806 | 1329.5 | 2.95   |
| HCK         | ENSG00000101336 | 1327   | 0      |
| CMAHP       | ENSG00000168405 | 1326.5 | 0      |
| SLC35E4     | ENSG00000100036 | 1324   | 3.675  |
| CSTL1       | ENSG00000125823 | 1324   | 0      |
| SORBS1      | ENSG00000095637 | 1322.5 | 2.82   |
| TBC1D14     | ENSG00000132405 | 1321   | 36.35  |
| AGPAT4      | ENSG00000026652 | 1320   | 15.235 |
| FEM1AP2     | ENSG00000265296 | 1319   | 0      |
| RAB3GAP2    | ENSG00000118873 | 1314.5 | 30     |
| CAPN2       | ENSG00000162909 | 1314   | 61.56  |
| FAM73A      | ENSG00000180488 | 1312   | 12.3   |
| NSRP1P1     | ENSG00000235613 | 1312   | 1.29   |
| HSD3BP2     | ENSG00000203858 | 1311   | 0.1    |

|               |                 |         |        |
|---------------|-----------------|---------|--------|
| TBCK          | ENSG00000145348 | 1310    | 11.335 |
| TRIM8         | ENSG00000171206 | 1308.5  | 22.985 |
| REXO1L1P      | ENSG00000205176 | 1308    | 0.165  |
| MANEAL        | ENSG00000185090 | 1307.5  | 40.6   |
| DIO2-AS1      | ENSG00000258766 | 1304.5  | 0.195  |
| DIO2          | ENSG00000211448 | 1304.5  | 0.05   |
| LPHN1         | ENSG00000072071 | 1299.5  | 43.815 |
| RPRD2         | ENSG00000163125 | 1296.5  | 39.895 |
| ADAMTS9-AS2   | ENSG00000241684 | 1295    | 0.345  |
| MRC2          | ENSG00000011028 | 1290.5  | 12.775 |
| PPP2R2B       | ENSG00000156475 | 1288.5  | 0      |
| PPP2R2B-IT1   | ENSG00000249553 | 1288.5  | 0      |
| CSPG4         | ENSG00000173546 | 1285    | 1.15   |
| GRM1          | ENSG00000152822 | 1283.5  | 0.085  |
| FUNDC2P3      | ENSG00000187103 | 1283.5  | 0      |
| BRMS1L        | ENSG00000100916 | 1281    | 21.76  |
| RIMS4         | ENSG00000101098 | 1281    | 10.205 |
| AGFG2         | ENSG00000106351 | 1280    | 10.105 |
| DCC           | ENSG00000187323 | 1278.5  | 0      |
| ZBTB8A        | ENSG00000160062 | 1276.75 | 9.17   |
| ZBTB8B        | ENSG00000273274 | 1276.75 | 1.33   |
| ARHGAP31      | ENSG00000031081 | 1272    | 2.65   |
| P2RY14        | ENSG00000174944 | 1271.5  | 1.115  |
| ANKFY1        | ENSG00000185722 | 1266.5  | 40.67  |
| CTDP1         | ENSG00000060069 | 1265    | 10.865 |
| ZUFSP         | ENSG00000153975 | 1263    | 16.795 |
| HS3ST5        | ENSG00000249853 | 1262    | 0.365  |
| BAZ1B         | ENSG00000009954 | 1260.5  | 87.88  |
| MMP16         | ENSG00000156103 | 1259.5  | 1.56   |
| OBSCN         | ENSG00000154358 | 1258.5  | 4.055  |
| RGL1          | ENSG00000143344 | 1256    | 2.615  |
| NF2           | ENSG00000186575 | 1255.5  | 52.785 |
| RPEP4         | ENSG00000233010 | 1255.5  | 1.42   |
| RARRES3       | ENSG00000133321 | 1255.5  | 0      |
| FLT4          | ENSG00000037280 | 1255    | 29.175 |
| MEF2BNB       | ENSG00000254901 | 1246.5  | 23.595 |
| MEF2BNB-MEF2B | ENSG00000064489 | 1246.5  | 3.805  |
| MEF2B         | ENSG00000213999 | 1246.5  | 1.435  |
| SGMS1         | ENSG00000198964 | 1246    | 8.225  |
| SMC2          | ENSG00000136824 | 1242    | 43.57  |
| BICC1         | ENSG00000122870 | 1236    | 3.885  |
| FAM133CP      | ENSG00000183055 | 1236    | 0.56   |
| LINC00937     | ENSG00000226091 | 1234    | 2.54   |
| ENPP7P5       | ENSG00000256589 | 1234    | 0.19   |
| HDAC4         | ENSG00000068024 | 1233.5  | 7.82   |
| MIR4440       | ENSG00000266109 | 1233.5  | 0      |
| PAX2          | ENSG00000075891 | 1232    | 3.15   |

|           |                 |         |        |
|-----------|-----------------|---------|--------|
| PHF5A     | ENSG00000100410 | 1229    | 68.115 |
| TNS3      | ENSG00000136205 | 1225.5  | 3.265  |
| CPOX      | ENSG00000080819 | 1222    | 57.925 |
| CLDND1    | ENSG00000080822 | 1222    | 56.185 |
| DNAH9     | ENSG00000007174 | 1220    | 0.04   |
| SECISBP2L | ENSG00000138593 | 1213    | 16.72  |
| SPTBN1    | ENSG00000115306 | 1210    | 56.85  |
| RPL23AP32 | ENSG00000237887 | 1210    | 0.44   |
| BAGE2     | ENSG00000187172 | 1207.5  | 0.1    |
| TPTE      | ENSG00000166157 | 1207.5  | 0      |
| HEPACAM2  | ENSG00000188175 | 1203    | 0.07   |
| ELN       | ENSG00000049540 | 1202    | 0.025  |
| CDCA4     | ENSG00000170779 | 1198    | 33.125 |
| SMIM2-AS1 | ENSG00000227258 | 1196    | 1.72   |
| TRABD2B   | ENSG00000269113 | 1195    | 1.045  |
| SNAPC4    | ENSG00000165684 | 1194.5  | 16.8   |
| OBFC1     | ENSG00000107960 | 1194    | 6.49   |
| NBPF1     | ENSG00000219481 | 1191    | 55.37  |
| AP3B2     | ENSG00000103723 | 1191    | 1.695  |
| SPG11     | ENSG00000104133 | 1190.5  | 25.285 |
| SFRP1     | ENSG00000104332 | 1189.5  | 1.24   |
| MED13     | ENSG00000108510 | 1189    | 36.045 |
| ST8SIA1   | ENSG00000111728 | 1189    | 0.95   |
| SPERT     | ENSG00000174015 | 1189    | 0      |
| PPP6R2    | ENSG00000100239 | 1188    | 32.87  |
| DRG1      | ENSG00000185721 | 1185    | 146.62 |
| SFI1      | ENSG00000198089 | 1185    | 34.42  |
| ZNF395    | ENSG00000186918 | 1183.75 | 14.09  |
| FBXO16    | ENSG00000214050 | 1183.75 | 7.06   |
| FOXO3     | ENSG00000118689 | 1181    | 31.185 |
| DGKB      | ENSG00000136267 | 1179    | 0.105  |
| TRHDE     | ENSG00000072657 | 1177    | 1.03   |
| CHCHD3P2  | ENSG00000257723 | 1177    | 0.105  |
| TPH2      | ENSG00000139287 | 1177    | 0.09   |
| USP54     | ENSG00000166348 | 1169    | 25.32  |
| ARL13B    | ENSG00000169379 | 1166.5  | 21.365 |
| CNTN6     | ENSG00000134115 | 1165.5  | 0      |
| CCDC91    | ENSG00000123106 | 1164.5  | 19.985 |
| NFIB      | ENSG00000147862 | 1164.5  | 11.245 |
| MUC12     | ENSG00000205277 | 1163.5  | 0.02   |
| SP4       | ENSG00000105866 | 1161.5  | 6.75   |
| ARHGAP29  | ENSG00000137962 | 1160.5  | 8.67   |
| ZCCHC17   | ENSG00000121766 | 1159    | 55.71  |
| IFT122    | ENSG00000163913 | 1157.5  | 12.17  |
| RANBP3    | ENSG00000031823 | 1155.5  | 93.71  |
| DDX10     | ENSG00000178105 | 1155.5  | 42.825 |
| BCL2L13   | ENSG00000099968 | 1155    | 48.075 |

|            |                 |        |        |
|------------|-----------------|--------|--------|
| COX10-AS1  | ENSG00000236088 | 1154.5 | 6.915  |
| DNM3       | ENSG00000197959 | 1152   | 3.735  |
| DNM3-IT1   | ENSG00000233540 | 1152   | 0.345  |
| WHSC1      | ENSG00000109685 | 1149.5 | 91.675 |
| CDH26      | ENSG00000124215 | 1147   | 1.33   |
| SSH1       | ENSG00000084112 | 1145.5 | 12.68  |
| CROCCP2    | ENSG00000215908 | 1144   | 21.675 |
| CELF5      | ENSG00000161082 | 1144   | 1.225  |
| ATP10D     | ENSG00000145246 | 1143.5 | 5.37   |
| SYNCRIP    | ENSG00000135316 | 1141.5 | 158.77 |
| SNX14      | ENSG00000135317 | 1141.5 | 31.55  |
| SMAD3      | ENSG00000166949 | 1139.5 | 17.245 |
| TYW1B      | ENSG00000254184 | 1139.5 | 3.345  |
| RNFT2      | ENSG00000135119 | 1138.5 | 10.82  |
| CUX2       | ENSG00000111249 | 1137.5 | 2.785  |
| ITPR1      | ENSG00000150995 | 1137   | 5.05   |
| RAB6A      | ENSG00000175582 | 1136.5 | 47.955 |
| EVA1A      | ENSG00000115363 | 1134.5 | 2.135  |
| THSD4      | ENSG00000187720 | 1134   | 0.76   |
| PTPRM      | ENSG00000173482 | 1133   | 4.615  |
| WWP2       | ENSG00000198373 | 1132.5 | 18.025 |
| ARNT2      | ENSG00000172379 | 1130.5 | 6.395  |
| ARL15      | ENSG00000185305 | 1126.5 | 18.205 |
| SSXP3      | ENSG00000225198 | 1126.5 | 0      |
| SBNO1      | ENSG00000139697 | 1125.5 | 40.055 |
| FAM198A    | ENSG00000144649 | 1123   | 1.6    |
| KRBOX1     | ENSG00000273291 | 1123   | 0.425  |
| ACKR2      | ENSG00000144648 | 1123   | 0.29   |
| HNRNPA1P22 | ENSG00000236459 | 1123   | 0.135  |
| ZNF662     | ENSG00000182983 | 1123   | 0.05   |
| CYP4F11    | ENSG00000171903 | 1122.5 | 0.02   |
| NHS        | ENSG00000188158 | 1122   | 1.92   |
| ZNF777     | ENSG00000196453 | 1121   | 24.765 |
| SIMC1      | ENSG00000170085 | 1119.5 | 55.465 |
| WIPI1      | ENSG00000070540 | 1117   | 6.4    |
| LINC00693  | ENSG00000228214 | 1117   | 2.265  |
| EBF3       | ENSG00000108001 | 1114   | 9.505  |
| MTBP       | ENSG00000172167 | 1113.5 | 11.265 |
| SNTB1      | ENSG00000172164 | 1113.5 | 2.945  |
| VPS39      | ENSG00000166887 | 1111.5 | 21.615 |
| RNF168     | ENSG00000163961 | 1111   | 15.935 |
| EMG1       | ENSG00000126749 | 1110   | 60.975 |
| C1S        | ENSG00000182326 | 1110   | 0.8    |
| CASZ1      | ENSG00000130940 | 1108   | 6.25   |
| ABI2       | ENSG00000138443 | 1105   | 69.245 |
| GRIK5      | ENSG00000105737 | 1104.5 | 0.73   |
| C10orf90   | ENSG00000154493 | 1104.5 | 0      |

|              |                 |        |         |
|--------------|-----------------|--------|---------|
| C20orf166    | ENSG00000174407 | 1099   | 0       |
| PSAP         | ENSG00000197746 | 1098.5 | 127.105 |
| SLC16A2      | ENSG00000147100 | 1098   | 10.625  |
| LZTFL1       | ENSG00000163818 | 1097   | 26.33   |
| SYT3         | ENSG00000213023 | 1095   | 3.115   |
| SHANK1       | ENSG00000161681 | 1095   | 1.855   |
| IFNAR1       | ENSG00000142166 | 1093.5 | 31.08   |
| USF1P1       | ENSG00000226501 | 1093.5 | 0.255   |
| DCP1B        | ENSG00000151065 | 1092   | 16.72   |
| OR14K1       | ENSG00000153230 | 1091   | 0       |
| OR3D1P       | ENSG00000230411 | 1091   | 0       |
| MIER3        | ENSG00000155545 | 1088.5 | 17.05   |
| ZNF346       | ENSG00000113761 | 1088   | 52.215  |
| NRP2         | ENSG00000118257 | 1088   | 10.345  |
| ZNF346-IT1   | ENSG00000251666 | 1088   | 4.335   |
| NEDD4        | ENSG00000069869 | 1088   | 3.545   |
| ANKRD30B     | ENSG00000180777 | 1086.5 | 0.035   |
| ARHGEF18     | ENSG00000104880 | 1084.5 | 25.685  |
| TMEM161B-AS1 | ENSG00000247828 | 1084   | 15.36   |
| RPS3AP22     | ENSG00000240083 | 1084   | 0       |
| SNORA70      | ENSG00000252969 | 1084   | 0       |
| VANGL1       | ENSG00000173218 | 1082   | 19.455  |
| SVOPL        | ENSG00000157703 | 1081   | 0.34    |
| BTBD3        | ENSG00000132640 | 1076.5 | 32.57   |
| PRPF38B      | ENSG00000134186 | 1076   | 73.855  |
| MRPS35P3     | ENSG00000270192 | 1072.5 | 0       |
| C7orf50      | ENSG00000146540 | 1072   | 49.48   |
| PREX1        | ENSG00000124126 | 1072   | 1.89    |
| PLA2G4C      | ENSG00000105499 | 1065.5 | 2.185   |
| DOCK4        | ENSG00000128512 | 1063.5 | 8.945   |
| CRTAC1       | ENSG00000095713 | 1063   | 0.445   |
| C1orf132     | ENSG00000203709 | 1062.5 | 0.745   |
| ABCC6P1      | ENSG00000256340 | 1062   | 1.77    |
| ESRRG        | ENSG00000196482 | 1062   | 1.475   |
| INHBA-AS1    | ENSG00000224116 | 1061   | 0       |
| SPAG6        | ENSG00000077327 | 1059.5 | 0.105   |
| HOXD3        | ENSG00000128652 | 1056.5 | 7.58    |
| HOXD4        | ENSG00000170166 | 1056.5 | 4.82    |
| SLC35F4      | ENSG00000151812 | 1056   | 0.19    |
| OGDHL        | ENSG00000197444 | 1054   | 5.465   |
| KPNB1        | ENSG00000108424 | 1051.5 | 351.085 |
| NAV3         | ENSG00000067798 | 1049.5 | 0.56    |
| SLC4A4       | ENSG00000080493 | 1049   | 1.165   |
| C19orf68     | ENSG00000185453 | 1048.5 | 6.535   |
| ZNF114       | ENSG00000178150 | 1048.5 | 4.89    |
| TAB1         | ENSG00000100324 | 1048   | 25.645  |
| GALNT14      | ENSG00000158089 | 1048   | 0.89    |

|            |                 |         |         |
|------------|-----------------|---------|---------|
| VPS53      | ENSG00000141252 | 1047.5  | 52.995  |
| RPS4XP17   | ENSG00000244097 | 1047.5  | 1.14    |
| SLC6A1     | ENSG00000157103 | 1046.5  | 0.435   |
| TXNDC12    | ENSG00000117862 | 1045.5  | 51.035  |
| KTI12      | ENSG00000198841 | 1045.5  | 10.52   |
| NFATC1     | ENSG00000131196 | 1044    | 8.455   |
| RAB6C      | ENSG00000222014 | 1044    | 0.76    |
| SEC61B     | ENSG00000106803 | 1037    | 91.355  |
| ST3GAL3    | ENSG00000126091 | 1034    | 9.39    |
| SPATA3     | ENSG00000173699 | 1031.5  | 0       |
| KCNK1      | ENSG00000135750 | 1030    | 8.885   |
| PRTG       | ENSG00000166450 | 1029    | 7.925   |
| UCK2       | ENSG00000143179 | 1028    | 99.52   |
| CDC73      | ENSG00000134371 | 1027.5  | 23.59   |
| ZNF252P    | ENSG00000196922 | 1023.5  | 11.55   |
| THOC3      | ENSG00000051596 | 1022    | 71.94   |
| APP        | ENSG00000142192 | 1021.5  | 177.485 |
| PCDH9-AS1  | ENSG00000234527 | 1021.5  | 0       |
| SSBP3      | ENSG00000157216 | 1020.5  | 80.375  |
| C1orf105   | ENSG00000180999 | 1020.5  | 0.145   |
| INADL      | ENSG00000132849 | 1019.25 | 12.51   |
| LAMTOR5P1  | ENSG00000236646 | 1019.25 | 0.54    |
| RN7SL180P  | ENSG00000242860 | 1019.25 | 0       |
| USP49      | ENSG00000164663 | 1019    | 6.22    |
| FIP1L1     | ENSG00000145216 | 1018    | 75.35   |
| PDGFRA     | ENSG00000134853 | 1018    | 0.635   |
| MORF4L2P1  | ENSG00000250147 | 1018    | 0.15    |
| GSX2       | ENSG00000180613 | 1018    | 0       |
| LNX1-AS1   | ENSG00000250930 | 1018    | 0       |
| LNX1-AS2   | ENSG00000248494 | 1018    | 0       |
| AOC2       | ENSG00000131480 | 1016    | 3.255   |
| SLK        | ENSG00000065613 | 1014    | 38.565  |
| BET1L      | ENSG00000177951 | 1014    | 22.79   |
| ODF3       | ENSG00000177947 | 1014    | 0.11    |
| FAM178A    | ENSG00000119906 | 1013    | 20.665  |
| FCRL4      | ENSG00000163518 | 1013    | 0       |
| CEP85L     | ENSG00000111860 | 1011.5  | 8.265   |
| ADD3       | ENSG00000148700 | 1011    | 42.03   |
| RBM8A      | ENSG00000131795 | 1010    | 211.51  |
| CCNI2      | ENSG00000205089 | 1008    | 1.445   |
| DIP2B      | ENSG00000066084 | 1006.5  | 17.34   |
| KANSL2     | ENSG00000139620 | 1005    | 29.27   |
| NOX1       | ENSG00000007952 | 1005    | 0.54    |
| HNRNPA1P26 | ENSG00000239345 | 1005    | 0.06    |
| ARIH1      | ENSG00000166233 | 1003.5  | 83.45   |
| YAP1       | ENSG00000137693 | 1003.5  | 24.84   |
| HEG1       | ENSG00000173706 | 1002    | 9.255   |

|             |                 |       |         |
|-------------|-----------------|-------|---------|
| LINC01036   | ENSG00000236030 | 998.5 | 0.445   |
| BPIFB6      | ENSG00000167104 | 998.5 | 0       |
| AMFR        | ENSG00000159461 | 996.5 | 55.375  |
| ST6GALNAC5  | ENSG00000117069 | 995.5 | 1.495   |
| RAB11FIP5   | ENSG00000135631 | 993.5 | 21.535  |
| SFXN5       | ENSG00000144040 | 993.5 | 21.43   |
| SESN1       | ENSG00000080546 | 992.5 | 13.165  |
| MYO1F       | ENSG00000142347 | 992.5 | 4.88    |
| PPCS        | ENSG00000127125 | 991.5 | 24.49   |
| CCDC30      | ENSG00000186409 | 991.5 | 2.85    |
| TEN1        | ENSG00000257949 | 990.5 | 7.56    |
| CDK3        | ENSG00000250506 | 990.5 | 2.26    |
| TEN1-CDK3   | ENSG00000261408 | 990.5 | 1.285   |
| NLGN2       | ENSG00000169992 | 990   | 32.56   |
| FSTL4       | ENSG00000053108 | 990   | 0.38    |
| TNFRSF19    | ENSG00000127863 | 989   | 3.005   |
| VDAC1       | ENSG00000213585 | 988.5 | 275.265 |
| EYA2        | ENSG00000064655 | 985   | 4.58    |
| GAPDHP54    | ENSG00000226769 | 985   | 0       |
| SSR2        | ENSG00000163479 | 984.5 | 200.155 |
| SH3D19      | ENSG00000109686 | 983.5 | 35.55   |
| WASH4P      | ENSG00000234769 | 983   | 18.155  |
| WASIR2      | ENSG00000231439 | 983   | 1.68    |
| IL9RP3      | ENSG00000226942 | 983   | 0.95    |
| BORA        | ENSG00000136122 | 982.5 | 27.305  |
| PHF7        | ENSG00000010318 | 982   | 11.33   |
| RNLS        | ENSG00000184719 | 979   | 0.08    |
| NPIPB4      | ENSG00000185864 | 978   | 85.035  |
| IBTK        | ENSG00000005700 | 976.5 | 20.155  |
| SCRN1       | ENSG00000136193 | 976   | 42.85   |
| SBK3        | ENSG00000231274 | 975.5 | 0.14    |
| NVL         | ENSG00000143748 | 975   | 79.67   |
| JAK1        | ENSG00000162434 | 974   | 40.38   |
| ALPL        | ENSG00000162551 | 974   | 2.46    |
| PDE6D       | ENSG00000156973 | 972   | 27.46   |
| ANGPTL4     | ENSG00000167772 | 970.5 | 1.765   |
| FPGT        | ENSG00000254685 | 969   | 9.69    |
| FPGT-TNNI3K | ENSG00000259030 | 969   | 0.03    |
| LRRC53      | ENSG00000162621 | 969   | 0       |
| TNNI3K      | ENSG00000116783 | 969   | 0       |
| PEMT        | ENSG00000133027 | 968.5 | 24.27   |
| LRP5        | ENSG00000162337 | 966   | 28.08   |
| CMC4        | ENSG00000182712 | 964.5 | 23.495  |
| MTCP1       | ENSG00000214827 | 964.5 | 5.225   |
| POLR3G      | ENSG00000113356 | 964   | 27.59   |
| LINC00969   | ENSG00000242086 | 964   | 24.055  |
| MUC20       | ENSG00000176945 | 964   | 0.845   |

|            |                 |       |        |
|------------|-----------------|-------|--------|
| SDHAP2     | ENSG00000215837 | 964   | 0      |
| SEC22C     | ENSG00000093183 | 963   | 37.22  |
| PTPRG      | ENSG00000144724 | 962   | 16.82  |
| BDH2       | ENSG00000164039 | 960.5 | 18.96  |
| SLC9B2     | ENSG00000164038 | 960.5 | 13.615 |
| ISLR2      | ENSG00000167178 | 960.5 | 0.125  |
| ZNF787     | ENSG00000142409 | 959   | 29.27  |
| SLX4IP     | ENSG00000149346 | 959   | 3.87   |
| SOX2       | ENSG00000181449 | 958.5 | 5.305  |
| GNG2       | ENSG00000186469 | 958.5 | 1.495  |
| SOX2-OT    | ENSG00000242808 | 958.5 | 0.24   |
| SETD2      | ENSG00000181555 | 955.5 | 42.59  |
| ZDHHC6     | ENSG00000023041 | 955.5 | 34.96  |
| PLAC1      | ENSG00000170965 | 954   | 7.24   |
| GPC6       | ENSG00000183098 | 951   | 7.51   |
| KIF24      | ENSG00000186638 | 951   | 7.315  |
| TTC39C     | ENSG00000168234 | 950   | 13.975 |
| CHST11     | ENSG00000171310 | 949.5 | 8.635  |
| ACBD5      | ENSG00000107897 | 949.5 | 7.05   |
| ADAMTS2    | ENSG00000087116 | 949.5 | 2.115  |
| TEAD1      | ENSG00000187079 | 949   | 19.98  |
| RCAN1      | ENSG00000159200 | 946   | 15.455 |
| PRICKLE1   | ENSG00000139174 | 946   | 8.64   |
| DEFB118    | ENSG00000131068 | 946   | 0      |
| NDNL2      | ENSG00000185115 | 944   | 17.17  |
| GUSBP11    | ENSG00000228315 | 944   | 11.615 |
| ASLP1      | ENSG00000244723 | 944   | 3.865  |
| FAM189A1   | ENSG00000104059 | 944   | 2.29   |
| C22orf43   | ENSG00000189269 | 944   | 0.525  |
| PLEKHA7    | ENSG00000166689 | 943.5 | 4.165  |
| SSPN       | ENSG00000123096 | 943   | 2.005  |
| ECSIT      | ENSG00000130159 | 942   | 34.45  |
| ZNF653     | ENSG00000161914 | 942   | 9.18   |
| ELAVL3     | ENSG00000196361 | 942   | 0.015  |
| EPHX4      | ENSG00000172031 | 940.5 | 2.83   |
| SPTBN4     | ENSG00000160460 | 940.5 | 2.035  |
| VASH2      | ENSG00000143494 | 938.5 | 9.395  |
| ZRANB2-AS2 | ENSG00000229956 | 938.5 | 0.31   |
| GRIA3      | ENSG00000125675 | 938.5 | 0      |
| ZNF521     | ENSG00000198795 | 936   | 7.165  |
| PAQR5      | ENSG00000137819 | 935.5 | 4.815  |
| ELOVL2     | ENSG00000197977 | 935   | 8.68   |
| DRD1       | ENSG00000184845 | 934   | 0      |
| TMEM14A    | ENSG00000096092 | 931.5 | 11.225 |
| GLRA2      | ENSG00000101958 | 930   | 0.36   |
| ARID3A     | ENSG00000116017 | 929.5 | 31.6   |
| EFCAB8     | ENSG00000215529 | 929   | 0      |

|                 |                 |       |        |
|-----------------|-----------------|-------|--------|
| ZNF761          | ENSG00000160336 | 927   | 5.7    |
| TPM3P9          | ENSG00000241015 | 927   | 4.325  |
| CHUK            | ENSG00000213341 | 925.5 | 29.995 |
| ERLIN1          | ENSG00000107566 | 925.5 | 21.655 |
| FRS2            | ENSG00000166225 | 925.5 | 14.38  |
| TMEM256         | ENSG00000205544 | 924   | 60.485 |
| TMEM256-PLSCR3  | ENSG00000187838 | 924   | 11.16  |
| C17orf61-PLSCR3 | ENSG00000262481 | 924   | 1.195  |
| CCDC73          | ENSG00000186714 | 923.5 | 0.37   |
| PALB2           | ENSG00000083093 | 922   | 12.98  |
| RFT1            | ENSG00000163933 | 920   | 33.88  |
| SFMBT1          | ENSG00000163935 | 920   | 11.535 |
| SERBP1P3        | ENSG00000242142 | 920   | 0.315  |
| VILL            | ENSG00000136059 | 919.5 | 2.245  |
| MMP2            | ENSG00000087245 | 919   | 1.645  |
| ZNF584          | ENSG00000171574 | 918.5 | 10.35  |
| LINC00534       | ENSG00000253394 | 918   | 0      |
| SERGEF          | ENSG00000129158 | 917.5 | 28.095 |
| TPH1            | ENSG00000129167 | 917.5 | 0.555  |
| SYNE2           | ENSG00000054654 | 916.5 | 12.485 |
| ESR2            | ENSG00000140009 | 916.5 | 1.185  |
| S100A12         | ENSG00000163221 | 916   | 0      |
| ERI2            | ENSG00000196678 | 911.5 | 18.58  |
| MPPED2          | ENSG00000066382 | 911.5 | 5.73   |
| DCUN1D3         | ENSG00000188215 | 911.5 | 4.34   |
| NUDT10          | ENSG00000122824 | 911   | 11.595 |
| TARSL2          | ENSG00000185418 | 910   | 21.26  |
| CPNE9           | ENSG00000144550 | 909.5 | 0.105  |
| KDM6A           | ENSG00000147050 | 909   | 31.57  |
| GTF2F2          | ENSG00000188342 | 908   | 26.24  |
| PRKD1           | ENSG00000184304 | 908   | 6.325  |
| C9orf85         | ENSG00000155621 | 907.5 | 12.985 |
| STAT1           | ENSG00000115415 | 906.5 | 31.365 |
| NAA25           | ENSG00000111300 | 906   | 57.325 |
| PARP6           | ENSG00000137817 | 905   | 44.96  |
| HEXA            | ENSG00000213614 | 905   | 42.63  |
| ST18            | ENSG00000147488 | 905   | 0.105  |
| CELF6           | ENSG00000273025 | 905   | 0.01   |
| PAK7            | ENSG00000101349 | 904.5 | 0.025  |
| LRRIQ3          | ENSG00000162620 | 904   | 2.12   |
| OSBPL2          | ENSG00000130703 | 903   | 16.665 |
| BRD7P6          | ENSG00000235289 | 902.5 | 0      |
| SYBU            | ENSG00000147642 | 900.5 | 8.12   |
| ETV5            | ENSG00000244405 | 900.5 | 0.45   |
| DGKG            | ENSG00000058866 | 900.5 | 0.27   |
| LEF1-AS1        | ENSG00000232021 | 899.5 | 0.59   |
| RHOXF2B         | ENSG00000203989 | 899.5 | 0.33   |

|             |                 |        |        |
|-------------|-----------------|--------|--------|
| RND3        | ENSG00000115963 | 897    | 21.91  |
| NBPF8       | ENSG00000162825 | 897    | 0      |
| SLC6A3      | ENSG00000142319 | 896    | 0.015  |
| USP53       | ENSG00000145390 | 895    | 22.595 |
| TAF3        | ENSG00000165632 | 894    | 13.125 |
| MTHFSD      | ENSG00000103248 | 893.5  | 15.745 |
| MORN2       | ENSG00000188010 | 892.5  | 16.68  |
| ARHGEF33    | ENSG00000214694 | 892.5  | 0.395  |
| PLAGL1      | ENSG00000118495 | 891.5  | 42.325 |
| HNF4A       | ENSG00000101076 | 885.5  | 0      |
| ZBTB7C      | ENSG00000184828 | 885    | 1.245  |
| TBCA        | ENSG00000171530 | 884    | 305.48 |
| LRRC2       | ENSG00000163827 | 884    | 0.065  |
| TASP1       | ENSG00000089123 | 883.5  | 9.585  |
| TMEM183A    | ENSG00000163444 | 881.5  | 76.225 |
| SHANK2      | ENSG00000162105 | 881.5  | 3.625  |
| SHPRH       | ENSG00000146414 | 879.5  | 20.67  |
| KIAA2026    | ENSG00000183354 | 879    | 10.455 |
| CNTNAP3     | ENSG00000106714 | 878.5  | 5.1    |
| STRA6       | ENSG00000137868 | 874    | 0.495  |
| CCDC33      | ENSG00000140481 | 874    | 0      |
| VPS4A       | ENSG00000132612 | 873.5  | 73.995 |
| CIRH1A      | ENSG00000141076 | 873.5  | 65.315 |
| SNTB2       | ENSG00000168807 | 873.5  | 14.815 |
| EREG        | ENSG00000124882 | 871    | 0.015  |
| TCTN3       | ENSG00000119977 | 870.5  | 27.085 |
| CCNY        | ENSG00000108100 | 870.5  | 25.97  |
| ABLIM1      | ENSG00000099204 | 870    | 33.26  |
| MAPKAPK3    | ENSG00000114738 | 868.5  | 50.75  |
| NPIPA7      | ENSG00000183889 | 868.5  | 14.405 |
| PKD1P1      | ENSG00000244257 | 868.5  | 12.265 |
| MYOF        | ENSG00000138119 | 868.5  | 0.89   |
| MYH15       | ENSG00000144821 | 867.75 | 0.37   |
| FXYD6       | ENSG00000137726 | 867.5  | 11.295 |
| DSCAML1     | ENSG00000177103 | 867.5  | 0.01   |
| FXYD2       | ENSG00000137731 | 867.5  | 0      |
| FXYD6-FXYD2 | ENSG00000255245 | 867.5  | 0      |
| RNU6-167P   | ENSG00000207019 | 867.5  | 0      |
| PITRM1      | ENSG00000107959 | 867    | 65.325 |
| SEMA6D      | ENSG00000137872 | 867    | 4.53   |
| PITRM1-AS1  | ENSG00000237399 | 867    | 1.32   |
| SLC16A12    | ENSG00000152779 | 866.5  | 0      |
| RBFOX3      | ENSG00000167281 | 866    | 1.72   |
| ATF2        | ENSG00000115966 | 865    | 36.16  |
| POU2F2      | ENSG00000028277 | 865    | 1.19   |
| TCF3        | ENSG00000071564 | 864.5  | 89.195 |
| ANKRD32     | ENSG00000133302 | 864.5  | 17.675 |

|           |                 |        |         |
|-----------|-----------------|--------|---------|
| ZNF730    | ENSG00000183850 | 864    | 0       |
| GRAMD4    | ENSG00000075240 | 863.5  | 13.75   |
| TMEM237   | ENSG00000155755 | 862.5  | 39.48   |
| ENO1P4    | ENSG00000241790 | 862.5  | 0.635   |
| KCNG4     | ENSG00000168418 | 862    | 0       |
| RAF1      | ENSG00000132155 | 861.5  | 79.915  |
| CELF4     | ENSG00000101489 | 861    | 2.5     |
| PKD1P5    | ENSG00000254681 | 860    | 20.875  |
| NPIPA8    | ENSG00000214940 | 860    | 0       |
| RASGRF2   | ENSG00000113319 | 859    | 2.385   |
| KIAA1432  | ENSG00000107036 | 858.5  | 9.875   |
| FAM194B   | ENSG00000165837 | 858.5  | 0.405   |
| GPR116    | ENSG00000069122 | 857.5  | 0       |
| EPHX1     | ENSG00000143819 | 857    | 45.475  |
| CCDC148   | ENSG00000153237 | 857    | 0.54    |
| ABLIM2    | ENSG00000163995 | 856.25 | 0.9     |
| SMIM20    | ENSG00000250317 | 855.5  | 9.69    |
| ZNF766    | ENSG00000196214 | 855.5  | 5.74    |
| ACOX2     | ENSG00000168306 | 855    | 0.295   |
| CARD16    | ENSG00000204397 | 854    | 0       |
| CARD17    | ENSG00000255221 | 854    | 0       |
| CASP1     | ENSG00000137752 | 854    | 0       |
| CASP1P2   | ENSG00000254750 | 854    | 0       |
| PTPN1     | ENSG00000196396 | 853.5  | 49.785  |
| PSMD11    | ENSG00000108671 | 852.5  | 80.79   |
| ADAMTS12  | ENSG00000151388 | 852.5  | 0.065   |
| RNU6-923P | ENSG00000201623 | 852.5  | 0       |
| SRRM4     | ENSG00000139767 | 852.5  | 0       |
| POLA1     | ENSG00000101868 | 849.5  | 30.455  |
| GGT7      | ENSG00000131067 | 848    | 21.575  |
| USP33     | ENSG00000077254 | 847    | 51.49   |
| BMPR2     | ENSG00000204217 | 847    | 10.95   |
| VBP1      | ENSG00000155959 | 846    | 82.53   |
| DPYSL2    | ENSG00000092964 | 846    | 16.955  |
| CAMK1D    | ENSG00000183049 | 844.5  | 3.5     |
| DGKZP1    | ENSG00000179611 | 844.5  | 0.805   |
| LINC00284 | ENSG00000233725 | 844.5  | 0.145   |
| LINC01057 | ENSG00000224081 | 842.5  | 1.635   |
| KATNBL1P2 | ENSG00000232857 | 842.5  | 0       |
| BMPR1A    | ENSG00000107779 | 841.5  | 14.07   |
| ZKSCAN1   | ENSG00000106261 | 841    | 25      |
| CBWD3     | ENSG00000196873 | 841    | 14.29   |
| TMEM131   | ENSG00000075568 | 839.5  | 20.505  |
| AP1B1     | ENSG00000100280 | 839    | 82.735  |
| PABPC4    | ENSG00000090621 | 836    | 199.425 |
| IDO2      | ENSG00000188676 | 836    | 0.075   |
| TMEM179   | ENSG00000258986 | 835    | 0.795   |

|             |                 |       |         |
|-------------|-----------------|-------|---------|
| TSPAN12     | ENSG00000106025 | 833.5 | 12.455  |
| NLGN1       | ENSG00000169760 | 832.5 | 5.43    |
| TLDC1       | ENSG00000140950 | 829.5 | 9.12    |
| BTBD10      | ENSG00000148925 | 829   | 14.875  |
| COL16A1     | ENSG00000084636 | 826.5 | 0.22    |
| CTNNA2      | ENSG00000066032 | 826   | 0       |
| ATP9B       | ENSG00000166377 | 825   | 7.195   |
| IKZF4       | ENSG00000123411 | 825   | 4.105   |
| PIK3R3      | ENSG00000117461 | 824.5 | 20.485  |
| ATXN8OS     | ENSG00000230223 | 824.5 | 0.055   |
| CDK12       | ENSG00000167258 | 824   | 64.85   |
| TAF8        | ENSG00000137413 | 823.5 | 23.29   |
| SNX16       | ENSG00000104497 | 823.5 | 2.015   |
| CAND2       | ENSG00000144712 | 822.5 | 14.24   |
| CERS3       | ENSG00000154227 | 822   | 0.065   |
| SPAG9       | ENSG00000008294 | 821.5 | 78.835  |
| MORC2       | ENSG00000133422 | 820.5 | 23.62   |
| GUCY1B2     | ENSG00000123201 | 820.5 | 1.57    |
| MORC2-AS1   | ENSG00000235989 | 820.5 | 0.685   |
| RAB11A      | ENSG00000103769 | 820   | 178.375 |
| DENND4A     | ENSG00000174485 | 820   | 17.12   |
| EVC         | ENSG00000072840 | 819   | 7.3     |
| CRMP1       | ENSG00000072832 | 819   | 4.31    |
| PDE11A      | ENSG00000128655 | 818.5 | 0.685   |
| CYCTP       | ENSG00000249909 | 818.5 | 0       |
| SNX18P16    | ENSG00000233218 | 816   | 2.27    |
| SNX18P15    | ENSG00000225015 | 816   | 1.4     |
| ANKRD20A12P | ENSG00000242676 | 816   | 0       |
| IPO9        | ENSG00000198700 | 815.5 | 75.57   |
| EPG5        | ENSG00000152223 | 815.5 | 5.275   |
| MYB         | ENSG00000118513 | 815.5 | 2.87    |
| ZNF71       | ENSG00000197951 | 814.5 | 4.125   |
| FGF2        | ENSG00000138685 | 814.5 | 3.695   |
| PPA2        | ENSG00000138777 | 813   | 76.855  |
| POU6F2      | ENSG00000106536 | 813   | 0.815   |
| LRRC4C      | ENSG00000148948 | 813   | 0.015   |
| BACH1       | ENSG00000156273 | 812.5 | 14.555  |
| BACH1-IT1   | ENSG00000248476 | 812.5 | 1.645   |
| BACH1-IT2   | ENSG00000228817 | 812.5 | 1.52    |
| BACH1-IT3   | ENSG00000234293 | 812.5 | 0.845   |
| GRIK1       | ENSG00000171189 | 812.5 | 0.16    |
| GRIK1-AS2   | ENSG00000183653 | 812.5 | 0       |
| LINC00189   | ENSG00000215533 | 812.5 | 0       |
| OR6C70      | ENSG00000184954 | 812   | 0.065   |
| RAB24       | ENSG00000169228 | 811.5 | 21.96   |
| MXD3        | ENSG00000213347 | 811.5 | 13.025  |
| PPM1F       | ENSG00000100034 | 811   | 46.435  |

|              |                 |       |        |
|--------------|-----------------|-------|--------|
| UBE2R2       | ENSG00000107341 | 811   | 37.06  |
| TICRR        | ENSG00000140534 | 809.5 | 32.52  |
| DNAJC16      | ENSG00000116138 | 809   | 12.465 |
| ADCY5        | ENSG00000173175 | 808.5 | 1.465  |
| GLI4         | ENSG00000250571 | 808   | 17.28  |
| ZFP41        | ENSG00000181638 | 808   | 11.175 |
| NEDD9        | ENSG00000111859 | 806.5 | 0.69   |
| KIAA1279     | ENSG00000198954 | 805.5 | 30.745 |
| MED28P1      | ENSG00000214875 | 805.5 | 0.81   |
| BEND5        | ENSG00000162373 | 805.5 | 0.25   |
| AGBL4        | ENSG00000186094 | 805.5 | 0.14   |
| AGBL4-IT1    | ENSG00000225623 | 805.5 | 0      |
| PEAK1        | ENSG00000173517 | 805   | 11.33  |
| SH3PXD2A     | ENSG00000107957 | 804.5 | 28.63  |
| SEMA4D       | ENSG00000187764 | 804.5 | 12.06  |
| ADAMTS4      | ENSG00000158859 | 804.5 | 0.075  |
| ISM1         | ENSG00000101230 | 804   | 0.45   |
| SEPT8        | ENSG00000164402 | 803.5 | 52.545 |
| FBN3         | ENSG00000142449 | 803.5 | 0.08   |
| ARMC2        | ENSG00000118690 | 803   | 5.495  |
| DSCR4        | ENSG00000184029 | 802.5 | 0.08   |
| NFX1         | ENSG00000086102 | 802   | 34.895 |
| CDC27        | ENSG00000004897 | 801   | 123.78 |
| HELQ         | ENSG00000163312 | 797   | 10.755 |
| DOK6         | ENSG00000206052 | 797   | 0.145  |
| LINGO4       | ENSG00000213171 | 796.5 | 0      |
| RORC         | ENSG00000143365 | 796.5 | 0      |
| XPO6         | ENSG00000169180 | 796   | 119.54 |
| MCTP1        | ENSG00000175471 | 796   | 2.565  |
| RPL7P18      | ENSG00000243806 | 796   | 0      |
| ELP3         | ENSG00000134014 | 795.5 | 29.165 |
| PLXNA2       | ENSG00000076356 | 795.5 | 2.505  |
| PTAFR        | ENSG00000169403 | 795   | 0.405  |
| POC1A        | ENSG00000164087 | 794.5 | 16.82  |
| HHIPL1       | ENSG00000182218 | 794   | 0.015  |
| PRICKLE2-AS1 | ENSG00000241572 | 794   | 0      |
| HIBADH       | ENSG00000106049 | 793   | 28.055 |
| ADCYAP1R1    | ENSG00000078549 | 793   | 2.125  |
| FNDC3A       | ENSG00000102531 | 792   | 30.315 |
| EEA1         | ENSG00000102189 | 792   | 19.18  |
| SP140L       | ENSG00000185404 | 792   | 1.11   |
| SP140        | ENSG00000079263 | 792   | 0.105  |
| RNY3P2       | ENSG00000199788 | 792   | 0      |
| SETD1A       | ENSG00000099381 | 791.5 | 48.67  |
| YME1L1       | ENSG00000136758 | 791   | 80.67  |
| NKAPP1       | ENSG00000233382 | 791   | 3.54   |
| EEF1A1P30    | ENSG00000237757 | 791   | 0.56   |

|                |                 |        |        |
|----------------|-----------------|--------|--------|
| RHOXF2         | ENSG00000131721 | 791    | 0      |
| KIAA1644       | ENSG00000138944 | 790.5  | 2.065  |
| CYP3A43        | ENSG00000021461 | 790    | 0.215  |
| JARID2         | ENSG00000008083 | 789    | 18.03  |
| ABCA13         | ENSG00000179869 | 789    | 0.06   |
| RILPL1         | ENSG00000188026 | 788.75 | 7.355  |
| PLEKHO2        | ENSG00000241839 | 787.5  | 2.735  |
| ANKDD1A        | ENSG00000166839 | 787.5  | 2.375  |
| KLHL3          | ENSG00000146021 | 787.5  | 1.115  |
| DDX58          | ENSG00000107201 | 787    | 1.485  |
| C1orf94        | ENSG00000142698 | 787    | 0.025  |
| WDR60          | ENSG00000126870 | 786.5  | 27.425 |
| MTND5P10       | ENSG00000271687 | 786.5  | 4.425  |
| MRS2           | ENSG00000124532 | 786    | 34.045 |
| DKK2           | ENSG00000155011 | 786    | 0.155  |
| RAC1P5         | ENSG00000213522 | 786    | 0.125  |
| SORCS2         | ENSG00000184985 | 784.5  | 0.295  |
| RAB11FIP3      | ENSG00000090565 | 784    | 25     |
| LINC00478      | ENSG00000215386 | 782.5  | 1.53   |
| SLC5A8         | ENSG00000256870 | 782    | 0      |
| PHC2           | ENSG00000134686 | 781.5  | 50.255 |
| CHCHD6         | ENSG00000159685 | 781.5  | 19.515 |
| MIR3605        | ENSG00000266239 | 781.5  | 2.315  |
| BRDT           | ENSG00000137948 | 781.5  | 0      |
| ITGA11         | ENSG00000137809 | 781    | 0.44   |
| PI4KA          | ENSG00000241973 | 780    | 65.445 |
| RARB           | ENSG00000077092 | 780    | 7.945  |
| CFL1P7         | ENSG00000213877 | 780    | 0.28   |
| SPEN           | ENSG00000065526 | 779.5  | 173.66 |
| PIK3C2B        | ENSG00000133056 | 779    | 11.24  |
| PRKCG          | ENSG00000126583 | 779    | 0.62   |
| SIN3B          | ENSG00000127511 | 778.5  | 39.15  |
| SLC9B1         | ENSG00000164037 | 776.5  | 0.63   |
| LINC00504      | ENSG00000248360 | 776.5  | 0.39   |
| VIPR1          | ENSG00000114812 | 776    | 6.39   |
| VIPR1-AS1      | ENSG00000232354 | 776    | 1.54   |
| NCOA1          | ENSG00000084676 | 775.5  | 19.77  |
| SPOCK1         | ENSG00000152377 | 775    | 0.435  |
| PPP5D1         | ENSG00000230510 | 774.5  | 1.275  |
| PNMAL2         | ENSG00000204851 | 774.5  | 0      |
| TXNDC5         | ENSG00000239264 | 774    | 121.5  |
| EEF1E1         | ENSG00000124802 | 774    | 63.42  |
| AREL1          | ENSG00000119682 | 774    | 35.395 |
| BLOC1S5        | ENSG00000188428 | 774    | 8.34   |
| EEF1E1-BLOC1S5 | ENSG00000265818 | 774    | 7.3    |
| BLOC1S5-TXNDC5 | ENSG00000259040 | 774    | 0      |
| TANGO6         | ENSG00000103047 | 773    | 12.26  |

|             |                 |       |         |
|-------------|-----------------|-------|---------|
| CACNA1G-AS1 | ENSG00000250107 | 773   | 0       |
| GRIA2       | ENSG00000120251 | 772.5 | 0.21    |
| EHMT1       | ENSG00000181090 | 772   | 48.4    |
| GAS8        | ENSG00000141013 | 772   | 15.535  |
| HHLA1       | ENSG00000132297 | 771.5 | 0.165   |
| OC90        | ENSG00000258417 | 771.5 | 0.015   |
| UCHL3       | ENSG00000118939 | 770   | 102.325 |
| LMO7        | ENSG00000136153 | 770   | 17.395  |
| DDX11L10    | ENSG00000233614 | 770   | 0       |
| ALKBH3      | ENSG00000166199 | 769.5 | 29.4    |
| SEC14L1P1   | ENSG00000213693 | 769.5 | 1.42    |
| NTM         | ENSG00000182667 | 769   | 0.1     |
| EIF4G1      | ENSG00000114867 | 768.5 | 545.57  |
| PSMD2       | ENSG00000175166 | 768.5 | 175.855 |
| AP2M1       | ENSG00000161203 | 768.5 | 156.695 |
| POLR2H      | ENSG00000163882 | 768.5 | 80.975  |
| EIF2B5      | ENSG00000145191 | 768.5 | 34.15   |
| DVL3        | ENSG00000161202 | 768.5 | 28.455  |
| ABCF3       | ENSG00000161204 | 768.5 | 24.01   |
| ECE2        | ENSG00000145194 | 768.5 | 5.225   |
| SNORD66     | ENSG00000212158 | 768.5 | 4.365   |
| FAM131A     | ENSG00000175182 | 768.5 | 3.315   |
| EPHB3       | ENSG00000182580 | 768.5 | 1.605   |
| CHRD        | ENSG00000090539 | 768.5 | 0.92    |
| VWA5B2      | ENSG00000145198 | 768.5 | 0.84    |
| EIF2B5-IT1  | ENSG00000227509 | 768.5 | 0       |
| RBX1        | ENSG00000100387 | 768   | 33.305  |
| XPNPEP3     | ENSG00000196236 | 768   | 22.89   |
| TCF20       | ENSG00000100207 | 768   | 19.715  |
| PTPRE       | ENSG00000132334 | 768   | 0.67    |
| EFCAB3      | ENSG00000172421 | 768   | 0.04    |
| RNU7-52P    | ENSG00000251981 | 768   | 0       |
| RPS23P7     | ENSG00000239527 | 768   | 0       |
| SLC35D1     | ENSG00000116704 | 767.5 | 11.01   |
| RNU6-229P   | ENSG00000252423 | 767.5 | 0       |
| ANAPC5      | ENSG00000089053 | 766.5 | 166.775 |
| TNPO1       | ENSG00000083312 | 766.5 | 113.77  |
| ARHGAP39    | ENSG00000147799 | 766.5 | 10.92   |
| ATF3        | ENSG00000162772 | 766   | 13.54   |
| TMPO        | ENSG00000120802 | 763.5 | 210.895 |
| TRAPPC11    | ENSG00000168538 | 763.5 | 18.86   |
| FBXO45      | ENSG00000174013 | 763.5 | 11.51   |
| MUC16       | ENSG00000181143 | 763.5 | 0.005   |
| LIN28B      | ENSG00000187772 | 763   | 35.74   |
| TECPR2      | ENSG00000196663 | 762.5 | 8.435   |
| TCEANC      | ENSG00000176896 | 762.5 | 2.9     |
| ATP6V0B     | ENSG00000117410 | 761.5 | 122.585 |

|           |                 |       |        |
|-----------|-----------------|-------|--------|
| SHOC2     | ENSG00000108061 | 761.5 | 42.795 |
| AKR1D1    | ENSG00000122787 | 761.5 | 0.055  |
| SATB2-AS1 | ENSG00000225953 | 761   | 2.63   |
| MATN3     | ENSG00000132031 | 761   | 0.475  |
| CEP170    | ENSG00000143702 | 760.5 | 73.195 |
| ZBTB8OS   | ENSG00000176261 | 759.5 | 69.27  |
| SRSF5     | ENSG00000100650 | 759   | 354.48 |
| STT3B     | ENSG00000163527 | 759   | 97.585 |
| LMBRD1    | ENSG00000168216 | 759   | 11.55  |
| NPM1P37   | ENSG00000219085 | 759   | 0.705  |
| LINC00461 | ENSG00000245526 | 758.5 | 0.99   |
| CKS1B     | ENSG00000173207 | 758   | 133.19 |
| PAWR      | ENSG00000177425 | 758   | 66.275 |
| TRMT61B   | ENSG00000171103 | 758   | 16.025 |
| EBF2      | ENSG00000221818 | 757   | 1.71   |
| AGO3      | ENSG00000126070 | 756.5 | 17.07  |
| ACAA1     | ENSG00000060971 | 756   | 34.695 |
| DEPTOR    | ENSG00000155792 | 756   | 2.115  |
| DLEC1     | ENSG00000008226 | 756   | 0.445  |
| PKN3      | ENSG00000160447 | 755.5 | 19.64  |
| FBXL20    | ENSG00000108306 | 755   | 8.58   |
| ADAM21    | ENSG00000139985 | 754   | 0.155  |
| ADAM20    | ENSG00000134007 | 754   | 0.04   |
| ADAM20P1  | ENSG00000259158 | 754   | 0.04   |
| TSG101    | ENSG00000074319 | 753.5 | 78.805 |
| MAML2     | ENSG00000184384 | 753.5 | 1.715  |
| DESI1     | ENSG00000100418 | 751.5 | 91.54  |
| VCL       | ENSG00000035403 | 751   | 55.015 |
| CCDC3     | ENSG00000151468 | 751   | 5.75   |
| TERF2IP   | ENSG00000166848 | 750   | 59.39  |
| LAMB1     | ENSG00000091136 | 750   | 29.175 |
| WDR90     | ENSG00000161996 | 749.5 | 35.265 |
| CLIC4     | ENSG00000169504 | 749   | 55.44  |
| MYO9A     | ENSG00000066933 | 748.5 | 19.17  |
| DCAF8L2   | ENSG00000189186 | 748.5 | 0      |
| WDR59     | ENSG00000103091 | 747.5 | 54.995 |
| IDE       | ENSG00000119912 | 747.5 | 37.79  |
| CRYM      | ENSG00000103316 | 747.5 | 0.9    |
| ANKS4B    | ENSG00000175311 | 747.5 | 0.02   |
| LINC01154 | ENSG00000257477 | 747.5 | 0      |
| LINC00865 | ENSG00000232229 | 746   | 0      |
| RFX2      | ENSG00000087903 | 745   | 11.385 |
| KLHL29    | ENSG00000119771 | 745   | 8.645  |
| WNT3      | ENSG00000108379 | 745   | 2.375  |
| KCNQ1     | ENSG00000053918 | 745   | 1.49   |
| CEP164P1  | ENSG00000226937 | 745   | 0.295  |
| COL11A1   | ENSG00000060718 | 745   | 0.01   |

|              |                 |       |         |
|--------------|-----------------|-------|---------|
| RSU1P2       | ENSG00000232554 | 745   | 0       |
| SOD2P1       | ENSG00000234257 | 745   | 0       |
| SUGP2        | ENSG00000064607 | 744.5 | 61.2    |
| FKBP5        | ENSG00000096060 | 744.5 | 32.875  |
| ADAMTS6      | ENSG00000049192 | 744   | 0.505   |
| RPEP1        | ENSG00000250732 | 744   | 0       |
| CBWD1        | ENSG00000172785 | 743.5 | 47.2    |
| SLC2A11      | ENSG00000133460 | 743   | 10.77   |
| RCE1         | ENSG00000173653 | 741.5 | 29.605  |
| C11orf80     | ENSG00000173715 | 741.5 | 9.135   |
| ZNF322       | ENSG00000181315 | 741   | 16.835  |
| B3GALNT1     | ENSG00000169255 | 741   | 0       |
| RHOJ         | ENSG00000126785 | 740.5 | 0.155   |
| P4HB         | ENSG00000185624 | 740   | 492.165 |
| LINC00667    | ENSG00000263753 | 740   | 0.04    |
| LINC00526    | ENSG00000264575 | 740   | 0       |
| CCL14        | ENSG00000213494 | 739.5 | 0       |
| CCL15        | ENSG00000267596 | 739.5 | 0       |
| CCL15-CCL14  | ENSG00000161574 | 739.5 | 0       |
| C9orf3       | ENSG00000148120 | 739   | 11.705  |
| SUFU         | ENSG00000107882 | 738   | 17.225  |
| TG           | ENSG00000042832 | 738   | 0.28    |
| MAGEA11      | ENSG00000185247 | 737.5 | 0.235   |
| C8orf34      | ENSG00000165084 | 737   | 5.61    |
| SUMF1        | ENSG00000144455 | 737   | 5.36    |
| GBAP1        | ENSG00000160766 | 737   | 4.35    |
| PNPT1P1      | ENSG00000229241 | 737   | 0.085   |
| ANKRD18CP    | ENSG00000159712 | 736.5 | 2.93    |
| ZNF322P1     | ENSG00000188801 | 736.5 | 2.445   |
| AACSP1       | ENSG00000250420 | 736.5 | 0       |
| PTPN13       | ENSG00000163629 | 735   | 29.305  |
| NLGN3        | ENSG00000196338 | 735   | 0.87    |
| ATP5J2       | ENSG00000241468 | 734.5 | 617.95  |
| CPSF4        | ENSG00000160917 | 734.5 | 41.06   |
| PTCD1        | ENSG00000106246 | 734.5 | 10.945  |
| ATP5J2-PTCD1 | ENSG00000248919 | 734.5 | 6.875   |
| ZFYVE1       | ENSG00000165861 | 734   | 6.185   |
| SCUBE2       | ENSG00000175356 | 734   | 0.64    |
| PAFAH1B1     | ENSG00000007168 | 733.5 | 93.88   |
| QPCTL        | ENSG00000011478 | 733.5 | 20.87   |
| SMIM17       | ENSG00000268182 | 733.5 | 0.115   |
| KIF3A        | ENSG00000131437 | 733   | 27.2    |
| PNLIPRP1     | ENSG00000187021 | 733   | 0.455   |
| ZNF695       | ENSG00000197472 | 732   | 8.26    |
| PRDM15       | ENSG00000141956 | 732   | 8.06    |
| ZNF670       | ENSG00000135747 | 732   | 2.67    |
| ADAMTS14     | ENSG00000138316 | 731.5 | 0.06    |

|                |                 |       |        |
|----------------|-----------------|-------|--------|
| LBX1-AS1       | ENSG00000227128 | 731   | 8.99   |
| SOHLH2         | ENSG00000120669 | 731   | 0.03   |
| CCDC169        | ENSG00000242715 | 731   | 0      |
| CCDC169-SOHLH2 | ENSG00000250709 | 731   | 0      |
| POLE           | ENSG00000177084 | 730.5 | 73.16  |
| FAM13A         | ENSG00000138640 | 730.5 | 18.77  |
| ATG4C          | ENSG00000125703 | 730   | 20.045 |
| CNTFR          | ENSG00000122756 | 730   | 3.64   |
| COL4A3         | ENSG00000169031 | 729   | 0.495  |
| TRPA1          | ENSG00000104321 | 728.5 | 1.28   |
| RPS20P20       | ENSG00000241942 | 728.5 | 0      |
| DDAH1          | ENSG00000153904 | 728   | 24.01  |
| TRPM3          | ENSG00000083067 | 726.5 | 0.175  |
| FAM69A         | ENSG00000154511 | 726   | 6.03   |
| LINC01004      | ENSG00000228393 | 726   | 3.04   |
| ZNF354C        | ENSG00000177932 | 725.5 | 0.01   |
| NMUR2          | ENSG00000132911 | 725.5 | 0      |
| HIP1           | ENSG00000127946 | 725   | 17.67  |
| CEP350         | ENSG00000135837 | 723   | 32.17  |
| AKAP6          | ENSG00000151320 | 723   | 1.615  |
| RASAL1         | ENSG00000111344 | 723   | 0.375  |
| TSPAN1         | ENSG00000117472 | 722.5 | 0      |
| TCEA3          | ENSG00000204219 | 721.5 | 0.68   |
| PADI6          | ENSG00000256049 | 721   | 0      |
| FDXR           | ENSG00000161513 | 720   | 8.64   |
| CMPK1          | ENSG00000162368 | 719.5 | 51.85  |
| ZNF704         | ENSG00000164684 | 719.5 | 14.06  |
| CKS1BP7        | ENSG00000254331 | 719.5 | 0      |
| NR2C1          | ENSG00000120798 | 719   | 58.48  |
| CERS4          | ENSG00000090661 | 719   | 11.29  |
| BTBD9          | ENSG00000183826 | 719   | 5.495  |
| TRPC5          | ENSG00000072315 | 719   | 0.03   |
| UBA2           | ENSG00000126261 | 718.5 | 174.22 |
| IRS4           | ENSG00000133124 | 718   | 370.48 |
| ME1            | ENSG00000065833 | 718   | 18.555 |
| EDEM3          | ENSG00000116406 | 718   | 17.825 |
| TTLL7          | ENSG00000137941 | 718   | 8.785  |
| IGFL2          | ENSG00000204866 | 717.5 | 0.075  |
| ENTHD1         | ENSG00000176177 | 716.5 | 0      |
| NEO1           | ENSG00000067141 | 716   | 31.13  |
| TNKS           | ENSG00000173273 | 716   | 13.915 |
| GLI2           | ENSG00000074047 | 716   | 8.7    |
| SCUBE1         | ENSG00000159307 | 715.5 | 1.125  |
| WBP2NL         | ENSG00000183066 | 715.5 | 0.185  |
| ERCC1          | ENSG00000012061 | 715   | 41.165 |
| LPP            | ENSG00000145012 | 714.5 | 9.55   |
| RUFY3          | ENSG00000018189 | 714   | 38.13  |

|          |                 |        |         |
|----------|-----------------|--------|---------|
| TNRC6B   | ENSG00000100354 | 714    | 27.195  |
| PXDNL    | ENSG00000147485 | 714    | 0.085   |
| GLIS3    | ENSG00000107249 | 713.5  | 1.93    |
| GPR39    | ENSG00000183840 | 712.5  | 0.29    |
| GLCE     | ENSG00000138604 | 712.25 | 17.21   |
| WDTC1    | ENSG00000142784 | 712    | 23.125  |
| SAMD3    | ENSG00000164483 | 712    | 0.19    |
| ALDH6A1  | ENSG00000119711 | 711.5  | 15.78   |
| CCDC176  | ENSG00000119636 | 711.5  | 2.805   |
| ZNF664   | ENSG00000179195 | 711    | 91.47   |
| FAM101A  | ENSG00000178882 | 711    | 0.18    |
| TPD52    | ENSG00000076554 | 710.5  | 52.32   |
| MRPS28   | ENSG00000147586 | 710.5  | 35.89   |
| STON2    | ENSG00000140022 | 710.5  | 7.835   |
| CCDC102B | ENSG00000150636 | 710.5  | 0.945   |
| TPK1     | ENSG00000196511 | 710    | 1.575   |
| MGLL     | ENSG00000074416 | 710    | 0.975   |
| DAB2     | ENSG00000153071 | 709.5  | 2.76    |
| COL19A1  | ENSG00000082293 | 709.5  | 0.665   |
| C9       | ENSG00000113600 | 709.5  | 0       |
| THEMIS   | ENSG00000172673 | 709.5  | 0       |
| BLM      | ENSG00000197299 | 708.5  | 35.41   |
| XKR4     | ENSG00000206579 | 708    | 0.015   |
| PKHD1    | ENSG00000170927 | 708    | 0       |
| TRAM2    | ENSG00000065308 | 707.5  | 7.945   |
| USH2A    | ENSG00000042781 | 707.5  | 0.045   |
| SNORD116 | ENSG00000202498 | 707.5  | 0       |
| UBR1     | ENSG00000159459 | 706.5  | 16.36   |
| SETD5    | ENSG00000168137 | 706    | 134.645 |
| CACUL1   | ENSG00000151893 | 706    | 38.695  |
| MYSM1    | ENSG00000162601 | 706    | 33.9    |
| C7orf60  | ENSG00000164603 | 706    | 6.345   |
| LDLRAD4  | ENSG00000168675 | 706    | 2.36    |
| DZIP1    | ENSG00000134874 | 705.5  | 31.505  |
| SMG5     | ENSG00000198952 | 705    | 92.695  |
| CALM1    | ENSG00000198668 | 704.5  | 229.595 |
| WNK1     | ENSG00000060237 | 703.5  | 102.19  |
| DLG3     | ENSG00000082458 | 703.5  | 32.02   |
| GTPBP2   | ENSG00000172432 | 703    | 32.61   |
| RELN     | ENSG00000189056 | 703    | 0.445   |
| RN7SKP86 | ENSG00000222386 | 703    | 0       |
| NEK10    | ENSG00000163491 | 702.5  | 3.01    |
| SUGCT    | ENSG00000175600 | 702    | 6.22    |
| CALN1    | ENSG00000183166 | 701    | 0.03    |
| SIN3A    | ENSG00000169375 | 700.5  | 61.45   |
| PLEKHA6  | ENSG00000143850 | 700.5  | 1.345   |
| RUVBL2   | ENSG00000183207 | 700    | 111.03  |

|           |                 |        |        |
|-----------|-----------------|--------|--------|
| TMEM68    | ENSG00000167904 | 700    | 12.86  |
| MAN2B2    | ENSG00000013288 | 699.5  | 7.15   |
| ABCB1     | ENSG00000085563 | 699.5  | 6.875  |
| LINC00871 | ENSG00000258700 | 699.5  | 0      |
| TYW1      | ENSG00000198874 | 699    | 14.35  |
| PSMD7     | ENSG00000103035 | 698.5  | 95.09  |
| RSPO2     | ENSG00000147655 | 698    | 0.27   |
| OR5H2     | ENSG00000197938 | 698    | 0      |
| OR5H6     | ENSG00000230301 | 698    | 0      |
| OR5H7P    | ENSG00000187900 | 698    | 0      |
| OR5H8P    | ENSG00000232535 | 698    | 0      |
| OR5K4     | ENSG00000196098 | 698    | 0      |
| UBFD1P1   | ENSG00000244653 | 698    | 0      |
| COMMD6    | ENSG00000188243 | 697.5  | 58.945 |
| JOSD1     | ENSG00000100221 | 697.5  | 37.735 |
| GUCY1A2   | ENSG00000152402 | 697.5  | 0.32   |
| KCNQ2     | ENSG00000075043 | 697    | 20.19  |
| CSF3R     | ENSG00000119535 | 697    | 0.02   |
| EYS       | ENSG00000188107 | 696    | 0.415  |
| GMEB1     | ENSG00000162419 | 695.5  | 16.73  |
| DOCK11    | ENSG00000147251 | 695.5  | 11.755 |
| PELI1     | ENSG00000197329 | 695.5  | 8.255  |
| SCARNA24  | ENSG00000252777 | 695.5  | 0      |
| SLC22A3   | ENSG00000146477 | 695.5  | 0      |
| PPP2R5C   | ENSG00000078304 | 695    | 120.26 |
| SLC25A16  | ENSG00000122912 | 694.5  | 13.995 |
| CRELD1    | ENSG00000163703 | 694    | 12.66  |
| IQGAP1    | ENSG00000140575 | 693.5  | 95.265 |
| CFDP1     | ENSG00000153774 | 693.5  | 71.49  |
| TMEM170A  | ENSG00000166822 | 693.5  | 15.43  |
| SPATA18   | ENSG00000163071 | 693    | 1.595  |
| COL6A5    | ENSG00000172752 | 692.75 | 0.055  |
| SLC47A1   | ENSG00000142494 | 692.5  | 10.255 |
| RPL17P43  | ENSG00000228331 | 692.5  | 0.19   |
| DCAF5     | ENSG00000139990 | 692    | 26.185 |
| EML4      | ENSG00000143924 | 691.5  | 46.03  |
| FAM91A1   | ENSG00000176853 | 691.5  | 30.87  |
| MAP3K7    | ENSG00000135341 | 691.5  | 24.345 |
| PLEKHF2   | ENSG00000175895 | 691.5  | 6.495  |
| LINC00092 | ENSG00000225194 | 691.5  | 0.425  |
| DDX47     | ENSG00000213782 | 691    | 57.665 |
| ZNF423    | ENSG00000102935 | 691    | 2.36   |
| APOLD1    | ENSG00000178878 | 691    | 1.66   |
| LINC00271 | ENSG00000231028 | 691    | 0.385  |
| ADAM3B    | ENSG00000260089 | 691    | 0.15   |
| EPHA1-AS1 | ENSG00000229153 | 691    | 0.035  |
| TAS2R41   | ENSG00000221855 | 691    | 0      |

|                |                 |        |        |
|----------------|-----------------|--------|--------|
| TAS2R62P       | ENSG00000234066 | 691    | 0      |
| SP1            | ENSG00000185591 | 690    | 42.83  |
| TRIM22         | ENSG00000132274 | 689.5  | 0.33   |
| OR52P1P        | ENSG00000181109 | 689.5  | 0      |
| OR56B1         | ENSG00000181023 | 689.5  | 0      |
| LUZP1          | ENSG00000169641 | 689    | 19.945 |
| MACF1          | ENSG00000127603 | 688    | 72.08  |
| ZNRF1          | ENSG00000186187 | 688    | 14.805 |
| KIAA0754       | ENSG00000255103 | 688    | 10.59  |
| EMR1           | ENSG00000174837 | 688    | 0.075  |
| ARHGAP12       | ENSG00000165322 | 687.5  | 9.96   |
| MYO7A          | ENSG00000137474 | 687    | 1.61   |
| C1orf131       | ENSG00000143633 | 686.5  | 67.945 |
| SLC8A2         | ENSG00000118160 | 686.5  | 0.32   |
| ALK            | ENSG00000171094 | 686.5  | 0.125  |
| GSTM3          | ENSG00000134202 | 686    | 33.885 |
| GSTM5          | ENSG00000134201 | 686    | 0.12   |
| KLK2           | ENSG00000167751 | 685.5  | 0.12   |
| INPP5D         | ENSG00000168918 | 685.5  | 0      |
| STAU1          | ENSG00000124214 | 685    | 97.945 |
| TMPRSS12       | ENSG00000186452 | 685    | 0.02   |
| TEAD4          | ENSG00000197905 | 684.5  | 35.755 |
| CLASP1         | ENSG00000074054 | 684.5  | 20.005 |
| DSC2           | ENSG00000134755 | 684.5  | 13.88  |
| EEPD1          | ENSG00000122547 | 684.5  | 4.13   |
| FASTKD5        | ENSG00000215251 | 684    | 21.565 |
| HOXC13         | ENSG00000123364 | 684    | 11.97  |
| UBOX5          | ENSG00000185019 | 684    | 3.685  |
| UBOX5-AS1      | ENSG00000235958 | 684    | 0.725  |
| SLC9C1         | ENSG00000172139 | 683.5  | 0.035  |
| SLC35A4        | ENSG00000176087 | 681.5  | 55.295 |
| SRA1           | ENSG00000213523 | 681.5  | 36.5   |
| AKAP2          | ENSG00000241978 | 681.5  | 13.635 |
| APBB3          | ENSG00000113108 | 681.5  | 7.31   |
| PALM2-AKAP2    | ENSG00000157654 | 681.5  | 2.99   |
| PALM2          | ENSG00000243444 | 681.5  | 0.835  |
| TOP1           | ENSG00000198900 | 681    | 128.78 |
| FBXO46         | ENSG00000177051 | 680.75 | 22.655 |
| CHCHD5         | ENSG00000125611 | 680    | 16.62  |
| MUC5B          | ENSG00000117983 | 680    | 0.02   |
| AGBL1          | ENSG00000166748 | 680    | 0      |
| UBE2V1         | ENSG00000244687 | 679.5  | 170.1  |
| TMEM189        | ENSG00000240849 | 679.5  | 41.165 |
| TMEM189-UBE2V1 | ENSG00000124208 | 679.5  | 1.685  |
| LINC01155      | ENSG00000232593 | 679    | 3.905  |
| MBOAT1         | ENSG00000172197 | 679    | 2.29   |
| LINC01122      | ENSG00000233723 | 679    | 0.095  |

|            |                 |       |         |
|------------|-----------------|-------|---------|
| CCDC167    | ENSG00000198937 | 678   | 37.695  |
| TPCN1      | ENSG00000186815 | 678   | 13.755  |
| PADI3      | ENSG00000142619 | 678   | 0       |
| NBEAL1     | ENSG00000144426 | 677.5 | 8.29    |
| GPM6B      | ENSG00000046653 | 677   | 9.88    |
| KIAA1328   | ENSG00000150477 | 676.5 | 8.51    |
| AGAP11     | ENSG00000151303 | 676.5 | 0.83    |
| CLIC5      | ENSG00000112782 | 676.5 | 0.36    |
| BMS1P3     | ENSG00000240089 | 676.5 | 0.02    |
| ADIRF      | ENSG00000148671 | 676.5 | 0       |
| FAM25A     | ENSG00000188100 | 676.5 | 0       |
| XDH        | ENSG00000158125 | 676.5 | 0       |
| SNX5       | ENSG00000089006 | 676   | 245.695 |
| SNORD17    | ENSG00000212232 | 676   | 47.08   |
| DHX32      | ENSG00000089876 | 676   | 16.415  |
| LTBP1      | ENSG00000049323 | 676   | 12.185  |
| AHNAK      | ENSG00000124942 | 676   | 7.655   |
| OVOL2      | ENSG00000125850 | 676   | 0       |
| RNU2-42P   | ENSG00000222629 | 676   | 0       |
| RBBP6      | ENSG00000122257 | 675.5 | 75.76   |
| NFATC2     | ENSG00000101096 | 675.5 | 0.605   |
| MIR3194    | ENSG00000266761 | 675.5 | 0       |
| CHD1L      | ENSG00000131778 | 675   | 54.175  |
| PRKG1      | ENSG00000185532 | 675   | 4.51    |
| OR6C74     | ENSG00000197706 | 675   | 0       |
| PAX7       | ENSG00000009709 | 674   | 0.765   |
| RGS7       | ENSG00000182901 | 674   | 0.74    |
| PRKRIRP8   | ENSG00000223963 | 674   | 0.03    |
| BNC1       | ENSG00000169594 | 673.5 | 0.945   |
| STARD4-AS1 | ENSG00000246859 | 673.5 | 0.58    |
| TTLL9      | ENSG00000131044 | 673   | 0.23    |
| NSF        | ENSG00000073969 | 672.5 | 48.37   |
| ATP2B4     | ENSG00000058668 | 672.5 | 25.575  |
| ANP32AP1   | ENSG00000259516 | 672.5 | 12.44   |
| SYNE3      | ENSG00000176438 | 672   | 0.845   |
| PACRG      | ENSG00000112530 | 672   | 0.555   |
| PARP12     | ENSG00000059378 | 672   | 0.37    |
| GALNTL5    | ENSG00000106648 | 671.5 | 0.175   |
| C19orf81   | ENSG00000235034 | 671   | 5.77    |
| APEX2      | ENSG00000169188 | 670.5 | 24.57   |
| PACSLN1    | ENSG00000124507 | 670.5 | 0.49    |
| SPTBN5     | ENSG00000137877 | 670.5 | 0.135   |
| MIR4310    | ENSG00000264850 | 670.5 | 0       |
| RNA5SP393  | ENSG00000200293 | 670.5 | 0       |
| TMEM2      | ENSG00000135048 | 670   | 12.675  |
| ASXL3      | ENSG00000141431 | 669.5 | 3.915   |
| COX7BP1    | ENSG00000243453 | 669.5 | 3.58    |

|              |                 |       |        |
|--------------|-----------------|-------|--------|
| ACTL6B       | ENSG00000077080 | 669.5 | 0.08   |
| PAK3         | ENSG00000077264 | 669   | 2.605  |
| FCF1P4       | ENSG00000226112 | 669   | 0      |
| NDUFA6-AS1   | ENSG00000237037 | 668.5 | 5.205  |
| MASP1        | ENSG00000127241 | 668.5 | 0.13   |
| SSH2         | ENSG00000141298 | 668   | 16.965 |
| SLCO4A1      | ENSG00000101187 | 668   | 11.49  |
| RPL21P123    | ENSG00000240531 | 668   | 0.175  |
| HORMAD2      | ENSG00000176635 | 668   | 0      |
| TET1         | ENSG00000138336 | 667.5 | 12.58  |
| ZPLD1        | ENSG00000170044 | 667.5 | 0.085  |
| HECTD4       | ENSG00000173064 | 667   | 21.695 |
| RPL7AP60     | ENSG00000213152 | 667   | 1.055  |
| MKRN3        | ENSG00000179455 | 666.5 | 0.96   |
| CAMTA1       | ENSG00000171735 | 666   | 102.45 |
| KLHL23       | ENSG00000213160 | 666   | 38.47  |
| CCPG1        | ENSG00000260916 | 666   | 15.71  |
| PHOSPHO2     | ENSG00000144362 | 666   | 6.655  |
| THAP7-AS1    | ENSG00000230513 | 666   | 3.77   |
| DYX1C1       | ENSG00000256061 | 666   | 3.125  |
| TUBA3FP      | ENSG00000161149 | 666   | 1.705  |
| DYX1C1-CCPG1 | ENSG00000261771 | 666   | 1.21   |
| PTCHD3P2     | ENSG00000231550 | 666   | 0.625  |
| P2RX6        | ENSG00000099957 | 666   | 0.225  |
| CAMTA1-IT1   | ENSG00000237402 | 666   | 0      |
| GSE1         | ENSG00000131149 | 665.5 | 55.855 |
| ATAD1        | ENSG00000138138 | 665.5 | 42.14  |
| CFL1P1       | ENSG00000223820 | 665.5 | 1.255  |
| ASGR2        | ENSG00000161944 | 665.5 | 0.055  |
| ADNP         | ENSG00000101126 | 665   | 69.875 |
| GPR161       | ENSG00000143147 | 665   | 6.985  |
| MAPKAPK2     | ENSG00000162889 | 664.5 | 40.985 |
| NXT2         | ENSG00000101888 | 664.5 | 11.31  |
| CEP41        | ENSG00000106477 | 663   | 13.785 |
| ROCK1P1      | ENSG00000263006 | 663   | 6.16   |
| MAP1B        | ENSG00000131711 | 662.5 | 26.23  |
| ARID4A       | ENSG00000032219 | 662.5 | 18.81  |
| UBE3C        | ENSG00000009335 | 662   | 91.75  |
| DIP2C        | ENSG00000151240 | 662   | 5.11   |
| MPHOSPH9     | ENSG00000051825 | 660.5 | 61.195 |
| SCARB1       | ENSG00000073060 | 660.5 | 60.65  |
| CDC42BPA     | ENSG00000143776 | 660.5 | 32.555 |
| C12orf65     | ENSG00000130921 | 660.5 | 19.695 |
| COL4A6       | ENSG00000197565 | 660.5 | 4.365  |
| MEGF6        | ENSG00000162591 | 660.5 | 1.46   |
| MARK1        | ENSG00000116141 | 660   | 13.3   |
| HDAC1P2      | ENSG00000233012 | 660   | 2.135  |

|           |                 |       |         |
|-----------|-----------------|-------|---------|
| CDK6      | ENSG00000105810 | 659   | 30.53   |
| BCL7C     | ENSG00000099385 | 658.5 | 33.545  |
| CCDC41    | ENSG00000173588 | 658   | 20.855  |
| ATP6V0A2  | ENSG00000185344 | 658   | 17.7    |
| PHF2      | ENSG00000197724 | 658   | 12.515  |
| RBMS2P1   | ENSG00000213250 | 658   | 1.41    |
| CES1P2    | ENSG00000260765 | 658   | 0       |
| KCNAB2    | ENSG00000069424 | 657.5 | 4.125   |
| CELF1     | ENSG00000149187 | 657   | 112.065 |
| MKL1      | ENSG00000196588 | 657   | 22.34   |
| RPL4P6    | ENSG00000230071 | 657   | 1.35    |
| TYR       | ENSG00000077498 | 656.5 | 0.045   |
| P2RY8     | ENSG00000182162 | 656.5 | 0       |
| TFRC      | ENSG00000072274 | 656   | 77.17   |
| RNF34     | ENSG00000170633 | 656   | 57.61   |
| AIF1L     | ENSG00000126878 | 656   | 21.99   |
| UVRAG     | ENSG00000198382 | 656   | 8.7     |
| WWOX      | ENSG00000186153 | 655.5 | 18.035  |
| EPHA5     | ENSG00000145242 | 655.5 | 1.15    |
| PDE8B     | ENSG00000113231 | 655.5 | 0.765   |
| SORCS3    | ENSG00000156395 | 655.5 | 0.01    |
| ALDH7A1P1 | ENSG00000251400 | 655.5 | 0       |
| FTH1P26   | ENSG00000218213 | 655.5 | 0       |
| LSM3P5    | ENSG00000260014 | 655.5 | 0       |
| GABRG3    | ENSG00000182256 | 655   | 0       |
| MEF2A     | ENSG00000068305 | 654.5 | 29.355  |
| ALG14     | ENSG00000172339 | 654.5 | 16.07   |
| PEBP4     | ENSG00000134020 | 654.5 | 0       |
| SYT12     | ENSG00000173227 | 654   | 0.32    |
| TMEM209   | ENSG00000146842 | 653.5 | 33.2    |
| CR1L      | ENSG00000197721 | 653   | 0.45    |
| OR1X5P    | ENSG00000214351 | 653   | 0.07    |
| CD46P1    | ENSG00000244703 | 653   | 0       |
| DHX30     | ENSG00000132153 | 652   | 110.275 |
| ADCY9     | ENSG00000162104 | 652   | 16.425  |
| RBKS      | ENSG00000171174 | 652   | 1.2     |
| CACNA1A   | ENSG00000141837 | 652   | 0       |
| MIR1226   | ENSG00000221585 | 652   | 0       |
| NFRKB     | ENSG00000170322 | 651.5 | 39.975  |
| DROSHA    | ENSG00000113360 | 651   | 102.3   |
| DCUN1D5   | ENSG00000137692 | 651   | 78.465  |
| DCAF6     | ENSG00000143164 | 651   | 54.685  |
| FNBP1     | ENSG00000187239 | 651   | 28.15   |
| GPC3      | ENSG00000147257 | 650.5 | 50.21   |
| GFRAL     | ENSG00000187871 | 650.5 | 0.035   |
| SGIP1     | ENSG00000118473 | 650.5 | 0.035   |
| STOM      | ENSG00000148175 | 650   | 23.41   |

|            |                 |       |         |
|------------|-----------------|-------|---------|
| MARCH1     | ENSG00000145416 | 649.5 | 1.59    |
| XRN1       | ENSG00000114127 | 649   | 24.215  |
| ADRBK1     | ENSG00000173020 | 648.5 | 46.455  |
| PLS3       | ENSG00000102024 | 648   | 440.165 |
| SATB1      | ENSG00000182568 | 648   | 19.435  |
| TBC1D5     | ENSG00000131374 | 648   | 8.92    |
| ZNF207     | ENSG00000010244 | 647   | 161.2   |
| PSMB2      | ENSG00000126067 | 647   | 114.26  |
| RHBDL3     | ENSG00000141314 | 647   | 2.54    |
| GATAD2A    | ENSG00000167491 | 646.5 | 138.66  |
| CALD1      | ENSG00000122786 | 646.5 | 50.23   |
| SCOC       | ENSG00000153130 | 646.5 | 25.72   |
| EYA1       | ENSG00000104313 | 646.5 | 9.12    |
| PTGER3     | ENSG00000050628 | 646.5 | 0.05    |
| GOLGA8M    | ENSG00000188626 | 646   | 0.4     |
| BRINP1     | ENSG00000078725 | 646   | 0       |
| RN7SL719P  | ENSG00000241075 | 646   | 0       |
| CDCA3      | ENSG00000111665 | 645.5 | 61.93   |
| DIS3L2     | ENSG00000144535 | 645.5 | 14.41   |
| GNB3       | ENSG00000111664 | 645.5 | 6.33    |
| GYG1P3     | ENSG00000231095 | 645.5 | 0       |
| TRPV1      | ENSG00000196689 | 645   | 4.31    |
| SHPK       | ENSG00000262304 | 645   | 2.06    |
| TSPAN6     | ENSG00000000003 | 644.5 | 40.335  |
| RNF216     | ENSG00000011275 | 644.5 | 33.47   |
| RBM12B     | ENSG00000183808 | 644.5 | 24.805  |
| RNF216-IT1 | ENSG00000237738 | 644.5 | 0.84    |
| RPSAP52    | ENSG00000241749 | 644   | 0.075   |
| HOXB6      | ENSG00000108511 | 643.5 | 70.43   |
| HOXB3      | ENSG00000120093 | 643.5 | 50.605  |
| HOXB-AS3   | ENSG00000233101 | 643.5 | 42.915  |
| ZFAND3     | ENSG00000156639 | 643.5 | 37.94   |
| HOXB5      | ENSG00000120075 | 643.5 | 20.2    |
| HOXB4      | ENSG00000182742 | 643.5 | 7.88    |
| TFEB       | ENSG00000112561 | 643.5 | 3.745   |
| HOXB-AS2   | ENSG00000239552 | 643.5 | 2.805   |
| MIR10A     | ENSG00000257178 | 643.5 | 2.11    |
| HOXB-AS1   | ENSG00000230148 | 643.5 | 1.475   |
| MNAT1      | ENSG00000020426 | 642.5 | 57.31   |
| LZIC       | ENSG00000162441 | 642.5 | 22.645  |
| CLEC16A    | ENSG00000038532 | 642.5 | 19.33   |
| SLC38A6    | ENSG00000139974 | 642.5 | 8.39    |
| GHR        | ENSG00000112964 | 642.5 | 1.025   |
| JAKMIP2    | ENSG00000176049 | 642   | 0.435   |
| FLRT2      | ENSG00000185070 | 642   | 0.01    |
| SNX9       | ENSG00000130340 | 641.5 | 18.9    |
| FGD1       | ENSG00000102302 | 641.5 | 17.045  |

|           |                 |       |        |
|-----------|-----------------|-------|--------|
| PRSS12    | ENSG00000164099 | 641.5 | 7.08   |
| RPGR      | ENSG00000156313 | 641   | 14.815 |
| DIAPH2    | ENSG00000147202 | 641   | 10.72  |
| DUX4L13   | ENSG00000258617 | 641   | 0      |
| DUX4L14   | ENSG00000258514 | 641   | 0      |
| ARL5A     | ENSG00000162980 | 640.5 | 42.945 |
| ACTR2     | ENSG00000138071 | 640   | 110.51 |
| L3MBTL4   | ENSG00000154655 | 640   | 0.745  |
| TMEM169   | ENSG00000163449 | 640   | 0.57   |
| ACACA     | ENSG00000132142 | 639   | 43.405 |
| FAM174B   | ENSG00000185442 | 639   | 3.825  |
| HMGB1P24  | ENSG00000254982 | 639   | 0.955  |
| ELAVL4    | ENSG00000162374 | 639   | 0.04   |
| LGI4      | ENSG00000153902 | 639   | 0.025  |
| HDAC1     | ENSG00000116478 | 638.5 | 204.22 |
| HS6ST3    | ENSG00000185352 | 638.5 | 1.66   |
| RN7SL164P | ENSG00000242614 | 638.5 | 0.475  |
| HSDL2     | ENSG00000119471 | 638   | 36.51  |
| RECQL5    | ENSG00000108469 | 638   | 21.425 |
| INVS      | ENSG00000119509 | 638   | 12.395 |
| C9orf147  | ENSG00000230185 | 638   | 2.715  |
| RN7SL75P  | ENSG00000239908 | 638   | 0.525  |
| TRIM24    | ENSG00000122779 | 637.5 | 58.57  |
| CFB       | ENSG00000243649 | 637.5 | 3.05   |
| C2        | ENSG00000166278 | 637.5 | 1.365  |
| SMOC2     | ENSG00000112562 | 637.5 | 0.02   |
| ADIPOR2   | ENSG00000006831 | 637   | 36.48  |
| PLCG2     | ENSG00000197943 | 637   | 4.805  |
| ROCK1     | ENSG00000067900 | 636.5 | 23.64  |
| NID1      | ENSG00000116962 | 636   | 65.145 |
| SCMH1     | ENSG00000010803 | 636   | 29.82  |
| EPS8      | ENSG00000151491 | 636   | 13.935 |
| GBAS      | ENSG00000146729 | 635.5 | 69.59  |
| HNRNPCP2  | ENSG00000204253 | 635.5 | 66.145 |
| PAXIP1    | ENSG00000157212 | 635.5 | 36.56  |
| LINC00491 | ENSG00000250682 | 635.5 | 5.2    |
| ZNF713    | ENSG00000178665 | 635.5 | 3.97   |
| MRPS17    | ENSG00000249773 | 635.5 | 3.255  |
| C2orf88   | ENSG00000187699 | 635.5 | 2.795  |
| C1QTNF1   | ENSG00000173918 | 635.5 | 2.03   |
| RNF10     | ENSG00000022840 | 635   | 156.76 |
| HIPK3     | ENSG00000110422 | 635   | 13.895 |
| RYBP      | ENSG00000163602 | 635   | 12.235 |
| EGR2      | ENSG00000122877 | 635   | 0.065  |
| GAPVD1    | ENSG00000165219 | 634.5 | 46.46  |
| C6orf10   | ENSG00000204296 | 634.5 | 0      |
| CAPN10    | ENSG00000142330 | 633.5 | 12.105 |

|            |                 |       |         |
|------------|-----------------|-------|---------|
| GPR35      | ENSG00000178623 | 633.5 | 0.62    |
| CUL2       | ENSG00000108094 | 633   | 26.58   |
| AP3B1      | ENSG00000132842 | 632.5 | 37.14   |
| ABCC1      | ENSG00000103222 | 632.5 | 21.28   |
| GNB2L1     | ENSG00000204628 | 632   | 2427.27 |
| FLG-AS1    | ENSG00000237975 | 632   | 0       |
| TMEM132D   | ENSG00000151952 | 632   | 0       |
| PTPN2      | ENSG00000175354 | 631.5 | 30.63   |
| LRBA       | ENSG00000198589 | 631.5 | 29.13   |
| NTRK1      | ENSG00000198400 | 631   | 0.515   |
| INSRR      | ENSG00000027644 | 631   | 0.05    |
| CRISP3     | ENSG00000096006 | 630.5 | 0       |
| KPNA6      | ENSG00000025800 | 630   | 56.12   |
| TRIM44     | ENSG00000166326 | 630   | 23.23   |
| ZFAND1     | ENSG00000104231 | 629.5 | 25.5    |
| MYBPC2     | ENSG00000086967 | 629.5 | 0.34    |
| PKN2       | ENSG00000065243 | 629   | 51.14   |
| MAP1A      | ENSG00000166963 | 629   | 10.675  |
| PPP1R9A    | ENSG00000158528 | 629   | 4.29    |
| TMIGD1     | ENSG00000182271 | 629   | 0       |
| SLC39A10   | ENSG00000196950 | 628.5 | 25.71   |
| EIF3A      | ENSG00000107581 | 628   | 184.115 |
| CERS6-AS1  | ENSG00000227617 | 628   | 4.845   |
| ANK3       | ENSG00000151150 | 627.5 | 13.575  |
| DNMBP      | ENSG00000107554 | 627.5 | 5.665   |
| ACO2       | ENSG00000100412 | 627   | 56.765  |
| HYKK       | ENSG00000188266 | 627   | 19.26   |
| UNC13A     | ENSG00000130477 | 627   | 0.195   |
| PTPRQ      | ENSG00000139304 | 626   | 0.045   |
| MAN1B1     | ENSG00000177239 | 625.5 | 21.195  |
| EPHB1      | ENSG00000154928 | 625.5 | 1.715   |
| FAM13C     | ENSG00000148541 | 625.5 | 1.25    |
| PDE6A      | ENSG00000132915 | 625.5 | 0.325   |
| PRNCR1     | ENSG00000224722 | 625.5 | 0       |
| EPHA10     | ENSG00000183317 | 625   | 1.585   |
| PAPD4      | ENSG00000164329 | 624.5 | 40.51   |
| SNUPN      | ENSG00000169371 | 624.5 | 27.435  |
| PTPN9      | ENSG00000169410 | 624.5 | 21.16   |
| TMEM199    | ENSG00000244045 | 624   | 14.065  |
| SARM1      | ENSG00000004139 | 624   | 10.65   |
| CEP112     | ENSG00000154240 | 624   | 8.505   |
| AXIN2      | ENSG00000168646 | 624   | 8.315   |
| NCKAP5     | ENSG00000176771 | 624   | 1.54    |
| SNTG2      | ENSG00000172554 | 624   | 1.25    |
| NCKAP5-IT1 | ENSG00000232474 | 624   | 0       |
| ATP13A3    | ENSG00000133657 | 623.5 | 29.52   |
| PARD3      | ENSG00000148498 | 623.5 | 19.605  |

|           |                 |       |         |
|-----------|-----------------|-------|---------|
| ZNF425    | ENSG00000204947 | 623.5 | 4.2     |
| EPCAM     | ENSG00000119888 | 623.5 | 1.115   |
| RCAN2     | ENSG00000172348 | 623.5 | 0.77    |
| KRTCAP2   | ENSG00000163463 | 623   | 290.25  |
| GNL3L     | ENSG00000130119 | 623   | 59.03   |
| TUB       | ENSG00000166402 | 623   | 24.18   |
| PTPN14    | ENSG00000152104 | 623   | 15.11   |
| MUC1      | ENSG00000185499 | 623   | 4.67    |
| TRIM46    | ENSG00000163462 | 623   | 2.21    |
| RHEBP2    | ENSG00000226964 | 622.5 | 5.595   |
| FAM35DP   | ENSG00000189014 | 622.5 | 0.6     |
| ARL17B    | ENSG00000228696 | 622   | 25.31   |
| KIAA1377  | ENSG00000110318 | 622   | 1.965   |
| SH3GL3    | ENSG00000140600 | 621.5 | 9.4     |
| DNAH12    | ENSG00000174844 | 621.5 | 0.46    |
| C3orf84   | ENSG00000236980 | 621.5 | 0       |
| FBXO39    | ENSG00000177294 | 621.5 | 0       |
| RNF7P1    | ENSG00000239831 | 621.5 | 0       |
| TEKT1     | ENSG00000167858 | 621.5 | 0       |
| RARS      | ENSG00000113643 | 621   | 130.06  |
| JAG2      | ENSG00000184916 | 621   | 13.22   |
| NUDT14    | ENSG00000183828 | 621   | 10.6    |
| KCND3     | ENSG00000171385 | 621   | 0.14    |
| KCND3-IT1 | ENSG00000232558 | 621   | 0       |
| BCOR      | ENSG00000183337 | 620.5 | 135.01  |
| CACNG8    | ENSG00000142408 | 620.5 | 3.215   |
| RPS11P6   | ENSG00000243024 | 620.5 | 0.325   |
| C12orf56  | ENSG00000185306 | 620.5 | 0.04    |
| AP3D1     | ENSG00000065000 | 620   | 120.53  |
| ZNF41     | ENSG00000147124 | 620   | 6.855   |
| LINC00466 | ENSG00000224209 | 620   | 0.06    |
| KIF3C     | ENSG00000084731 | 619.5 | 8.99    |
| MGAT4A    | ENSG00000071073 | 619.5 | 3.99    |
| CARM1     | ENSG00000142453 | 619   | 105.845 |
| KIAA0368  | ENSG00000136813 | 619   | 85.04   |
| SLC9C2    | ENSG00000162753 | 619   | 0.045   |
| VWF       | ENSG00000110799 | 619   | 0.005   |
| LDHB      | ENSG00000111716 | 618.5 | 868.94  |
| RBM26     | ENSG00000139746 | 618.5 | 90.07   |
| AP2B1     | ENSG00000006125 | 618.5 | 65.31   |
| ZNF383    | ENSG00000188283 | 618.5 | 3.375   |
| RPL17P42  | ENSG00000239520 | 618.5 | 0.24    |
| ITPKB-AS1 | ENSG00000228548 | 618.5 | 0       |
| NETO1     | ENSG00000166342 | 618.5 | 0       |
| PGBD5     | ENSG00000177614 | 618   | 6.06    |
| NUDT5     | ENSG00000165609 | 617.5 | 101.9   |
| LINC00842 | ENSG00000223477 | 617.5 | 0.02    |

|             |                 |       |         |
|-------------|-----------------|-------|---------|
| ANXA8L1     | ENSG00000150165 | 617.5 | 0       |
| HEATR5A     | ENSG00000129493 | 617   | 18.11   |
| DTD2        | ENSG00000129480 | 617   | 16.76   |
| ARHGAP44    | ENSG00000006740 | 617   | 8.575   |
| SNX33       | ENSG00000173548 | 617   | 5.56    |
| ADAM19      | ENSG00000135074 | 617   | 2.265   |
| SRD5A2      | ENSG00000049319 | 616.5 | 0       |
| PIFO        | ENSG00000173947 | 616   | 0.675   |
| LGALS2      | ENSG00000100079 | 616   | 0.225   |
| LINC-PINT   | ENSG00000231721 | 615.5 | 3.14    |
| CA14        | ENSG00000118298 | 615   | 1.1     |
| FOLH1       | ENSG00000086205 | 615   | 0.48    |
| COCH        | ENSG00000100473 | 614.5 | 39.29   |
| ZNF616      | ENSG00000204611 | 614.5 | 5.665   |
| ZNF836      | ENSG00000196267 | 614.5 | 1.21    |
| HTR1D       | ENSG00000179546 | 614.5 | 0.84    |
| CD84        | ENSG00000066294 | 614.5 | 0.035   |
| CNTNAP5     | ENSG00000155052 | 614.5 | 0       |
| LPA         | ENSG00000198670 | 614.5 | 0       |
| SMARCA2     | ENSG00000080503 | 614   | 12.87   |
| RAD51C      | ENSG00000108384 | 613   | 68.465  |
| CUX1        | ENSG00000257923 | 613   | 26.785  |
| ARHGEF3     | ENSG00000163947 | 613   | 9.065   |
| HMCN1       | ENSG00000143341 | 613   | 1.52    |
| SPI1        | ENSG00000066336 | 613   | 0.6     |
| SPATA12     | ENSG00000186451 | 613   | 0.33    |
| MIR1302-10  | ENSG00000243485 | 613   | 0       |
| LRRC47      | ENSG00000130764 | 612.5 | 48.44   |
| DNMT3B      | ENSG00000088305 | 612.5 | 20.185  |
| EPHA7       | ENSG00000135333 | 612.5 | 13.305  |
| EFCAB4B     | ENSG00000130038 | 612.5 | 5.81    |
| DGKK        | ENSG00000204466 | 612.5 | 0.055   |
| MCU         | ENSG00000156026 | 612   | 19.91   |
| RANBP10     | ENSG00000141084 | 612   | 14.475  |
| FOXP2       | ENSG00000128573 | 612   | 10.45   |
| CHRNA4      | ENSG00000117971 | 612   | 0.395   |
| RPL18P11    | ENSG00000213307 | 612   | 0       |
| XPNPEP2     | ENSG00000122121 | 612   | 0       |
| PTPRA       | ENSG00000132670 | 611.5 | 47.85   |
| VPS16       | ENSG00000215305 | 611.5 | 17.51   |
| FAM24B      | ENSG00000213185 | 611.5 | 0.705   |
| ADORA2A-AS1 | ENSG00000178803 | 611.5 | 0.51    |
| CUZD1       | ENSG00000138161 | 611.5 | 0.135   |
| AGPAT3      | ENSG00000160216 | 611   | 46.48   |
| PPFIA4      | ENSG00000143847 | 611   | 2.85    |
| CCDC114     | ENSG00000105479 | 611   | 0.37    |
| CTNNA1      | ENSG00000044115 | 610.5 | 140.625 |

|              |                 |       |        |
|--------------|-----------------|-------|--------|
| LIMA1        | ENSG00000050405 | 610.5 | 32.97  |
| RN7SL867P    | ENSG00000265361 | 610.5 | 0      |
| MRPS24       | ENSG00000062582 | 610   | 103.52 |
| PSPC1        | ENSG00000121390 | 610   | 50.605 |
| URGCP        | ENSG00000106608 | 610   | 15.85  |
| FBXW4        | ENSG00000107829 | 610   | 12.655 |
| LPHN3        | ENSG00000150471 | 610   | 8.78   |
| AIFM2        | ENSG00000042286 | 610   | 3.175  |
| BOK-AS1      | ENSG00000234235 | 610   | 0      |
| URGCP-MRPS24 | ENSG00000270617 | 610   | 0      |
| ACAP2        | ENSG00000114331 | 609.5 | 21.87  |
| ACAP2-IT1    | ENSG00000229325 | 609.5 | 0.56   |
| SFMBT2       | ENSG00000198879 | 609   | 13.49  |
| GLIS1        | ENSG00000174332 | 609   | 0.725  |
| TRDN         | ENSG00000186439 | 609   | 0.05   |
| ATG14        | ENSG00000126775 | 608.5 | 7.915  |
| EIF3H        | ENSG00000147677 | 608   | 138.25 |
| LRR8D        | ENSG00000171492 | 608   | 15.435 |
| LRCH2        | ENSG00000130224 | 608   | 10.57  |
| LRR8C        | ENSG00000171488 | 608   | 5.97   |
| STAC         | ENSG00000144681 | 608   | 0.465  |
| GABRA6       | ENSG00000145863 | 608   | 0      |
| LY86         | ENSG00000112799 | 608   | 0      |
| SNORA35      | ENSG00000208839 | 608   | 0      |
| BCAR3        | ENSG00000137936 | 607.5 | 6.07   |
| JAZF1        | ENSG00000153814 | 607   | 5.89   |
| RNU6-979P    | ENSG00000206623 | 607   | 0      |
| ILDR2        | ENSG00000143195 | 606.5 | 2.935  |
| FAM189A2     | ENSG00000135063 | 606.5 | 1.27   |
| OR10J9P      | ENSG00000249197 | 606.5 | 0.065  |
| ARSH         | ENSG00000205667 | 606.5 | 0      |
| STK38        | ENSG00000112079 | 606   | 19.535 |
| SHROOM3      | ENSG00000138771 | 606   | 6.11   |
| TRPC6        | ENSG00000137672 | 606   | 0.265  |
| CYP4F10P     | ENSG00000267241 | 606   | 0      |
| ABCB7        | ENSG00000131269 | 605.5 | 26.59  |
| LAIR1        | ENSG00000167613 | 605.5 | 0.025  |
| LINC00577    | ENSG00000203809 | 605.5 | 0      |
| ACOT8        | ENSG00000101473 | 605   | 18.76  |
| RBPM5        | ENSG00000157110 | 605   | 14.24  |
| SLC41A2      | ENSG00000136052 | 604   | 6.77   |
| RENB         | ENSG00000102032 | 604   | 1.665  |
| NTMT1        | ENSG00000148335 | 603   | 65.42  |
| CREB5        | ENSG00000146592 | 602.5 | 32.83  |
| CHURC1       | ENSG00000258289 | 602.5 | 31.74  |
| MAP3K13      | ENSG00000073803 | 602.5 | 16.345 |
| FNTB         | ENSG00000257365 | 602.5 | 16.32  |

|             |                 |       |        |
|-------------|-----------------|-------|--------|
| FCHSD2      | ENSG00000137478 | 602.5 | 15.98  |
| RAB15       | ENSG00000139998 | 602.5 | 11.965 |
| OTUD3       | ENSG00000169914 | 602.5 | 10.82  |
| CHURC1-FNTB | ENSG00000125954 | 602.5 | 9.41   |
| SDK1        | ENSG00000146555 | 602.5 | 4.86   |
| SLC48A1     | ENSG00000211584 | 602.5 | 3.68   |
| RAPGEF3     | ENSG00000079337 | 602.5 | 0.5    |
| RBMX2P1     | ENSG00000226406 | 602.5 | 0.08   |
| PDXP        | ENSG00000241360 | 601.5 | 60.225 |
| SH3BP1      | ENSG00000100092 | 601.5 | 18     |
| ADAMTS17    | ENSG00000140470 | 601.5 | 4.865  |
| ZNF385C     | ENSG00000187595 | 601   | 1.02   |
| LINC00622   | ENSG00000260941 | 601   | 0.32   |
| MST1        | ENSG00000173531 | 600.5 | 7.85   |
| GPA33       | ENSG00000143167 | 600.5 | 0.025  |
| RNU2-47P    | ENSG00000222581 | 600.5 | 0      |
| KAZN        | ENSG00000189337 | 600   | 12.565 |
| EFCAB5      | ENSG00000176927 | 600   | 0.71   |
| FAM178B     | ENSG00000168754 | 600   | 0.23   |
| ERCC3       | ENSG00000163161 | 599.5 | 52.39  |
| RSRC1       | ENSG00000174891 | 599.5 | 45.32  |
| PTK7        | ENSG00000112655 | 599.5 | 30.17  |
| TTC9        | ENSG00000133985 | 599.5 | 1.72   |
| ATP13A5     | ENSG00000187527 | 599.5 | 0.025  |
| SMYD1       | ENSG00000115593 | 599.5 | 0      |
| CHID1       | ENSG00000177830 | 599   | 55.585 |
| SNCA        | ENSG00000145335 | 599   | 22.215 |
| N4BP2       | ENSG00000078177 | 599   | 5.66   |
| NHSL2       | ENSG00000204131 | 599   | 1.14   |
| RPS26P11    | ENSG00000196933 | 599   | 0      |
| PI4KAP1     | ENSG00000215513 | 598.5 | 39.02  |
| FAM222B     | ENSG00000173065 | 598.5 | 18.875 |
| HAUS3       | ENSG00000214367 | 598.5 | 14.335 |
| POLN        | ENSG00000130997 | 598.5 | 7.925  |
| BMPRI1B     | ENSG00000138696 | 598.5 | 4.595  |
| C4orf21     | ENSG00000138658 | 598   | 12.125 |
| WDR78       | ENSG00000152763 | 598   | 3.015  |
| GRM4        | ENSG00000124493 | 598   | 0.36   |
| CD53        | ENSG00000143119 | 598   | 0.305  |
| CACNG2      | ENSG00000166862 | 598   | 0      |
| PRIM2       | ENSG00000146143 | 597.5 | 14.195 |
| USP42       | ENSG00000106346 | 597.5 | 13.815 |
| TBC1D9      | ENSG00000109436 | 597.5 | 9.95   |
| MAGI2       | ENSG00000187391 | 597.5 | 0.97   |
| DIAPH2-AS1  | ENSG00000236256 | 597.5 | 0.325  |
| TNRC18P1    | ENSG00000249661 | 597.5 | 0.32   |
| MAGI2-IT1   | ENSG00000235751 | 597.5 | 0.23   |

|              |                 |        |         |
|--------------|-----------------|--------|---------|
| PNPT1        | ENSG00000138035 | 597    | 36.47   |
| ZEB2         | ENSG00000169554 | 597    | 14.105  |
| EFCAB2       | ENSG00000203666 | 597    | 7.925   |
| CECR1        | ENSG00000093072 | 597    | 0.265   |
| USP50        | ENSG00000170236 | 597    | 0.215   |
| RNU6-999P    | ENSG00000251754 | 597    | 0       |
| MCMBP        | ENSG00000197771 | 596.5  | 73.66   |
| DHRS4        | ENSG00000157326 | 596.5  | 19.935  |
| TMEM234      | ENSG00000160055 | 596.5  | 15.51   |
| DHRS4-AS1    | ENSG00000215256 | 596.5  | 7.9     |
| RAI2         | ENSG00000131831 | 596.5  | 1.795   |
| NADK         | ENSG00000008130 | 596    | 45.87   |
| FOXJ3        | ENSG00000198815 | 596    | 35.315  |
| CABLES1      | ENSG00000134508 | 596    | 35.045  |
| OCA2         | ENSG00000104044 | 596    | 1.905   |
| SLC39A9      | ENSG00000029364 | 595.5  | 31.725  |
| SYT9         | ENSG00000170743 | 595.5  | 0.29    |
| RC3H1        | ENSG00000135870 | 595    | 19.24   |
| FNDC3B       | ENSG00000075420 | 595    | 19.065  |
| HEY2         | ENSG00000135547 | 595    | 5.72    |
| RC3H1-IT1    | ENSG00000236535 | 595    | 1.665   |
| EIF3E        | ENSG00000104408 | 594.5  | 340.015 |
| CHMP3        | ENSG00000115561 | 594.5  | 47.37   |
| RNF103       | ENSG00000239305 | 594.5  | 11.21   |
| COL13A1      | ENSG00000197467 | 594.5  | 2.68    |
| RNF103-CHMP3 | ENSG00000249884 | 594.5  | 0.35    |
| HYDIN        | ENSG00000157423 | 594.5  | 0.225   |
| RNU6-640P    | ENSG00000200563 | 594.5  | 0       |
| RNF19B       | ENSG00000116514 | 594    | 14.715  |
| WNT7B        | ENSG00000188064 | 594    | 0.155   |
| CCND2P1      | ENSG00000256847 | 594    | 0       |
| CNGA3        | ENSG00000144191 | 594    | 0       |
| SLC22A10     | ENSG00000184999 | 594    | 0       |
| PTPRS        | ENSG00000105426 | 593.5  | 36.93   |
| C6orf136     | ENSG00000204564 | 593.5  | 22.735  |
| HMGCS2       | ENSG00000134240 | 593.5  | 0.035   |
| ZMYND11      | ENSG00000015171 | 593    | 22.255  |
| ADAMTSL3     | ENSG00000156218 | 593    | 0.505   |
| TUBA8P2      | ENSG00000261665 | 593    | 0       |
| KMT2D        | ENSG00000167548 | 592.75 | 50.815  |
| PRKAG1       | ENSG00000181929 | 592.75 | 43.32   |
| PSMF1        | ENSG00000125818 | 592.5  | 183.89  |
| RAB5B        | ENSG00000111540 | 592.5  | 38.17   |
| CREM         | ENSG00000095794 | 592.5  | 12.01   |
| CDKL1        | ENSG00000100490 | 592.5  | 8.83    |
| ACTG1P3      | ENSG00000215388 | 592.5  | 1.25    |
| OSBPL1A      | ENSG00000141447 | 592    | 34.185  |

|           |                 |        |         |
|-----------|-----------------|--------|---------|
| KMT2C     | ENSG00000055609 | 591.5  | 32.25   |
| TLL2      | ENSG00000095587 | 591.5  | 0.9     |
| HSPA8P14  | ENSG00000257539 | 591.5  | 0.415   |
| SULT2A1   | ENSG00000105398 | 591.5  | 0.375   |
| UBE2QL1   | ENSG00000215218 | 591.5  | 0.125   |
| TRIP12    | ENSG00000153827 | 591    | 142.54  |
| CAST      | ENSG00000153113 | 591    | 75.95   |
| GPR124    | ENSG00000020181 | 591    | 4.375   |
| PLEKHA2   | ENSG00000169499 | 591    | 2.355   |
| WDR47     | ENSG00000085433 | 590.5  | 11.02   |
| DFFA      | ENSG00000160049 | 590    | 97.09   |
| GGPS1     | ENSG00000152904 | 589.5  | 68.305  |
| SPPL2A    | ENSG00000138600 | 589.5  | 20.875  |
| ADTRP     | ENSG00000111863 | 589    | 0.03    |
| CEACAM18  | ENSG00000213822 | 589    | 0       |
| GNG7      | ENSG00000176533 | 588.5  | 8.37    |
| ABCA12    | ENSG00000144452 | 588.5  | 0.07    |
| RASA1     | ENSG00000145715 | 588    | 15.63   |
| PLD1      | ENSG00000075651 | 588    | 4.16    |
| CSRP1     | ENSG00000159176 | 588    | 0.61    |
| PP13439   | ENSG00000183657 | 588    | 0.21    |
| SRSF6     | ENSG00000124193 | 587.5  | 178.455 |
| CLCC1     | ENSG00000121940 | 587.5  | 48.99   |
| MITF      | ENSG00000187098 | 587.5  | 5.305   |
| AKNAD1    | ENSG00000162641 | 587.5  | 0.025   |
| MACC1     | ENSG00000183742 | 587.5  | 0.005   |
| OPRD1     | ENSG00000116329 | 587    | 0.63    |
| CABIN1    | ENSG00000099991 | 586.75 | 47.38   |
| RBM45     | ENSG00000155636 | 586.5  | 8.4     |
| CPEB2-AS1 | ENSG00000247624 | 586.5  | 0.035   |
| HIPK1     | ENSG00000163349 | 586    | 33.84   |
| PKP2      | ENSG00000057294 | 586    | 13.275  |
| NUGGC     | ENSG00000189233 | 586    | 0.03    |
| RPTOR     | ENSG00000141564 | 585.5  | 25.415  |
| RTN4RL1   | ENSG00000185924 | 585.5  | 1.65    |
| CSNK1E    | ENSG00000213923 | 585    | 431.995 |
| NFIX      | ENSG00000008441 | 585    | 12.455  |
| BTK       | ENSG00000010671 | 584.5  | 0.35    |
| DPH6-AS1  | ENSG00000248079 | 584.5  | 0.22    |
| MIR383    | ENSG00000199127 | 584.5  | 0       |
| SGCZ      | ENSG00000185053 | 584.5  | 0       |
| SIGLEC9   | ENSG00000129450 | 584.5  | 0       |
| TBC1D16   | ENSG00000167291 | 584    | 17.98   |
| XPO4      | ENSG00000132953 | 584    | 16.34   |
| PCDH11X   | ENSG00000102290 | 584    | 0.015   |
| KRT18P11  | ENSG00000215089 | 584    | 0       |
| MIR202HG  | ENSG00000166917 | 584    | 0       |

|             |                 |       |         |
|-------------|-----------------|-------|---------|
| VPS41       | ENSG00000006715 | 583.5 | 28.235  |
| ZNRF3       | ENSG00000183579 | 583.5 | 12.53   |
| ZNRF3-IT1   | ENSG00000235786 | 583.5 | 0.485   |
| FAIM3       | ENSG00000162894 | 583.5 | 0.07    |
| DSG1        | ENSG00000134760 | 583.5 | 0       |
| TROVE2      | ENSG00000116747 | 583   | 62.815  |
| ZZZ3        | ENSG00000036549 | 583   | 52.065  |
| MLLT1       | ENSG00000130382 | 583   | 47.57   |
| KCTD13      | ENSG00000174943 | 583   | 21.545  |
| SLC4A8      | ENSG00000050438 | 583   | 3.435   |
| ASPHD1      | ENSG00000174939 | 583   | 2.55    |
| MLXIP       | ENSG00000175727 | 582.5 | 54.31   |
| CBFA2T2     | ENSG00000078699 | 582.5 | 10.91   |
| IGF1        | ENSG00000017427 | 582.5 | 0.055   |
| PLA2G4E     | ENSG00000188089 | 582.5 | 0.015   |
| STX8        | ENSG00000170310 | 582   | 23.76   |
| ANKRD36     | ENSG00000135976 | 581.5 | 15.47   |
| HTT         | ENSG00000197386 | 581   | 64.15   |
| CTNBL1      | ENSG00000132792 | 581   | 33.245  |
| ATF7IP      | ENSG00000171681 | 581   | 31.445  |
| CADM2       | ENSG00000175161 | 581   | 3.685   |
| DPYSL3      | ENSG00000113657 | 580.5 | 0.62    |
| MAPK1       | ENSG00000100030 | 580   | 96.48   |
| LARS2       | ENSG00000011376 | 580   | 42.21   |
| PTEN        | ENSG00000171862 | 580   | 35.885  |
| RPS3AP15    | ENSG00000244674 | 580   | 0.1     |
| MIB1        | ENSG00000101752 | 579.5 | 24.93   |
| SPRED2      | ENSG00000198369 | 579.5 | 8.81    |
| ARHGEF17    | ENSG00000110237 | 579.5 | 4.195   |
| CLDN11      | ENSG00000013297 | 579.5 | 0.32    |
| SLC7A14     | ENSG00000013293 | 579.5 | 0.03    |
| KRT8P13     | ENSG00000241416 | 579.5 | 0       |
| IFFO1       | ENSG00000010295 | 579   | 21.71   |
| SLC30A7     | ENSG00000162695 | 579   | 16.29   |
| BMP7        | ENSG00000101144 | 578.5 | 35.595  |
| SCN8A       | ENSG00000196876 | 578.5 | 2.09    |
| PCMTD2      | ENSG00000203880 | 578   | 36.755  |
| LINC00266-1 | ENSG00000149656 | 578   | 0.47    |
| PUM1        | ENSG00000134644 | 577.5 | 96.085  |
| ATXN2       | ENSG00000204842 | 577.5 | 83.865  |
| MXI1        | ENSG00000119950 | 577.5 | 33.74   |
| PIK3C3      | ENSG00000078142 | 577.5 | 27.275  |
| RASA2       | ENSG00000155903 | 577.5 | 7.005   |
| SOX5        | ENSG00000134532 | 577.5 | 3.06    |
| MYH16       | ENSG00000002079 | 577.5 | 0.615   |
| PCBP2       | ENSG00000197111 | 577   | 686.745 |
| PRR13       | ENSG00000205352 | 577   | 192.63  |

|            |                 |       |        |
|------------|-----------------|-------|--------|
| TTLL4      | ENSG00000135912 | 577   | 78.71  |
| NUP88      | ENSG00000108559 | 577   | 76.735 |
| CIR1       | ENSG00000138433 | 577   | 23.52  |
| LHFPL5     | ENSG00000197753 | 577   | 0      |
| PRCP       | ENSG00000137509 | 576.5 | 35.17  |
| C11orf82   | ENSG00000165490 | 576.5 | 15.895 |
| MLTK       | ENSG00000091436 | 576.5 | 13.98  |
| ZNF780A    | ENSG00000197782 | 576.5 | 5.96   |
| ZNF780B    | ENSG00000128000 | 576.5 | 4.85   |
| RAB30      | ENSG00000137502 | 576.5 | 3.175  |
| SBF2-AS1   | ENSG00000246273 | 576.5 | 2.71   |
| LRRK2      | ENSG00000188906 | 576   | 0.635  |
| ATP6V1A    | ENSG00000114573 | 575.5 | 79.205 |
| SEPT6      | ENSG00000125354 | 575.5 | 57.185 |
| C19orf47   | ENSG00000160392 | 575.5 | 21.615 |
| RIBC2      | ENSG00000128408 | 575.5 | 4.39   |
| MLYCD      | ENSG00000103150 | 575.5 | 4.295  |
| OSGIN1     | ENSG00000140961 | 575.5 | 0.87   |
| TMEM59     | ENSG00000116209 | 575   | 67.235 |
| ZRANB1     | ENSG00000019995 | 575   | 16.79  |
| TMEM242    | ENSG00000215712 | 575   | 6.8    |
| MEGF11     | ENSG00000157890 | 575   | 4.585  |
| C1orf61    | ENSG00000125462 | 575   | 3.455  |
| GNA14      | ENSG00000156049 | 575   | 0.375  |
| SPAG5      | ENSG00000076382 | 574.5 | 65.685 |
| PIGS       | ENSG00000087111 | 574.5 | 63.115 |
| ACBD6      | ENSG00000135847 | 574.5 | 47.155 |
| UNC119     | ENSG00000109103 | 574.5 | 22.325 |
| EBAG9      | ENSG00000147654 | 574.5 | 18.115 |
| SGK494     | ENSG00000167524 | 574.5 | 6.805  |
| ALDOC      | ENSG00000109107 | 574.5 | 3.015  |
| ZBTB20     | ENSG00000181722 | 574.5 | 1.82   |
| ZBTB20-AS2 | ENSG00000241295 | 574.5 | 0.185  |
| MIR3121    | ENSG00000265435 | 574.5 | 0      |
| RFC3       | ENSG00000133119 | 574   | 58.815 |
| CHMP5      | ENSG00000086065 | 574   | 37.625 |
| RAPH1      | ENSG00000173166 | 574   | 11.32  |
| CNIH3      | ENSG00000143786 | 574   | 8.07   |
| AKR1B1P1   | ENSG00000229991 | 574   | 0      |
| BAG6       | ENSG00000204463 | 573.5 | 206.73 |
| CHAF1B     | ENSG00000159259 | 573.5 | 45.23  |
| MORC3      | ENSG00000159256 | 573.5 | 16.645 |
| SLC44A1    | ENSG00000070214 | 573.5 | 14     |
| LILRB4     | ENSG00000186818 | 573.5 | 0.065  |
| VN1R105P   | ENSG00000242856 | 573.5 | 0      |
| TMCO1      | ENSG00000143183 | 573   | 111.75 |
| IFT81      | ENSG00000122970 | 573   | 21.895 |

|             |                 |        |        |
|-------------|-----------------|--------|--------|
| SUV420H1    | ENSG00000110066 | 573    | 20.09  |
| TMEM108     | ENSG00000144868 | 573    | 5.92   |
| IPCEF1      | ENSG00000074706 | 572.5  | 0.685  |
| ITGAM       | ENSG00000169896 | 572.5  | 0      |
| GALT        | ENSG00000213930 | 572    | 23.64  |
| ZNF652      | ENSG00000198740 | 572    | 16.455 |
| PKD2        | ENSG00000118762 | 572    | 16.085 |
| MSRB3       | ENSG00000174099 | 572    | 6.93   |
| IL11RA      | ENSG00000137070 | 572    | 6.09   |
| ARHGAP25    | ENSG00000163219 | 572    | 0.36   |
| NSG2        | ENSG00000170091 | 572    | 0.12   |
| SRRM1       | ENSG00000133226 | 571.5  | 202.06 |
| EFNA5       | ENSG00000184349 | 571.5  | 28.445 |
| BLVRA       | ENSG00000106605 | 571.5  | 20.125 |
| PAPD5       | ENSG00000121274 | 571.5  | 18.84  |
| SHANK3      | ENSG00000251322 | 571.5  | 7.65   |
| ARMC4       | ENSG00000169126 | 571.5  | 3.05   |
| HSF2BP      | ENSG00000160207 | 571.5  | 1.225  |
| KCTD1       | ENSG00000134504 | 571    | 17.42  |
| STMN4       | ENSG00000015592 | 571    | 0      |
| MORC4       | ENSG00000133131 | 570.5  | 19.8   |
| ANKRD20A14P | ENSG00000232745 | 570.5  | 4.455  |
| RIPPLY1     | ENSG00000147223 | 570.5  | 0      |
| SEL1L2      | ENSG00000101251 | 570.5  | 0      |
| RCOR3       | ENSG00000117625 | 570    | 34.475 |
| CTAGE5      | ENSG00000150527 | 570    | 11.285 |
| CCDC15      | ENSG00000149548 | 570    | 4.03   |
| NT5E        | ENSG00000135318 | 570    | 0.51   |
| MIA2        | ENSG00000150526 | 570    | 0      |
| IDH3B       | ENSG00000101365 | 569.5  | 89.075 |
| TADA2A      | ENSG00000108264 | 569.5  | 19.93  |
| CKAP2L      | ENSG00000169607 | 569.25 | 25.03  |
| NT5DC4      | ENSG00000144130 | 569.25 | 0.035  |
| DAZL        | ENSG00000092345 | 569    | 0      |
| AMZ2        | ENSG00000196704 | 568.5  | 86.125 |
| LIPE-AS1    | ENSG00000213904 | 568.5  | 5.17   |
| BTBD11      | ENSG00000151136 | 568.5  | 3.07   |
| RGS9        | ENSG00000108370 | 568    | 0.415  |
| PDGFC       | ENSG00000145431 | 567.5  | 8.52   |
| TMCO4       | ENSG00000162542 | 567.5  | 4.23   |
| SPTLC3      | ENSG00000172296 | 567.5  | 0.24   |
| ALPK3       | ENSG00000136383 | 567.5  | 0.14   |
| AOX1        | ENSG00000138356 | 567.5  | 0.035  |
| SERPINA5    | ENSG00000188488 | 567.5  | 0.03   |
| SERPINA3    | ENSG00000196136 | 567.5  | 0      |
| SERPINA4    | ENSG00000100665 | 567.5  | 0      |
| AMOTL1      | ENSG00000166025 | 567    | 22.585 |

|           |                 |        |         |
|-----------|-----------------|--------|---------|
| FAM13B    | ENSG00000031003 | 567    | 21.37   |
| NCOA3     | ENSG00000124151 | 567    | 13.36   |
| ATP8B4    | ENSG00000104043 | 567    | 0.045   |
| PKIB      | ENSG00000135549 | 566.5  | 3.49    |
| BEST3     | ENSG00000127325 | 566.5  | 0.065   |
| SSX9      | ENSG00000204648 | 566.5  | 0       |
| ZNF146    | ENSG00000167635 | 566    | 83.415  |
| PROSC     | ENSG00000147471 | 566    | 25.815  |
| MTMR3     | ENSG00000100330 | 566    | 22.59   |
| ZNF565    | ENSG00000196357 | 566    | 1.65    |
| ZNRF3-AS1 | ENSG00000177993 | 566    | 0.855   |
| CNN2P1    | ENSG00000227201 | 566    | 0.63    |
| HS2ST1    | ENSG00000153936 | 565    | 26.545  |
| SGSM1     | ENSG00000167037 | 565    | 1.295   |
| LINC01140 | ENSG00000267272 | 565    | 0.265   |
| FAM114A2  | ENSG00000055147 | 564.5  | 13.83   |
| MRPS31P5  | ENSG00000243406 | 564.5  | 3.48    |
| STEAP4    | ENSG00000127954 | 564.5  | 0.07    |
| TPTE2P2   | ENSG00000272281 | 564.5  | 0.06    |
| ZC3H11A   | ENSG00000058673 | 564    | 87.01   |
| TBCD      | ENSG00000141556 | 564    | 41.21   |
| FAM177A1  | ENSG00000151327 | 564    | 25.815  |
| PPP2R3C   | ENSG00000092020 | 564    | 23.275  |
| CUEDC2    | ENSG00000107874 | 564    | 22.895  |
| TMCC1     | ENSG00000172765 | 564    | 11.435  |
| ZBED6     | ENSG00000257315 | 564    | 6.26    |
| WNT7A     | ENSG00000154764 | 564    | 0.015   |
| SNAP23    | ENSG00000092531 | 563.75 | 63.545  |
| PEPD      | ENSG00000124299 | 563.5  | 39.44   |
| UACA      | ENSG00000137831 | 563.5  | 26.935  |
| BRWD3     | ENSG00000165288 | 563.5  | 16.23   |
| RPS6KC1   | ENSG00000136643 | 563.5  | 11.44   |
| NLRP1     | ENSG00000091592 | 563.5  | 6.89    |
| MAP4      | ENSG00000047849 | 563    | 111.025 |
| LPGAT1    | ENSG00000123684 | 563    | 31.87   |
| FAM206A   | ENSG00000119328 | 563    | 17.685  |
| VPS26BP1  | ENSG00000224895 | 563    | 0.85    |
| CRTC3     | ENSG00000140577 | 562.5  | 35.215  |
| DNAJC1    | ENSG00000136770 | 562.5  | 24.24   |
| AGAP5     | ENSG00000172650 | 562    | 12.575  |
| EPDR1     | ENSG00000086289 | 562    | 5.67    |
| BMS1P4    | ENSG00000242338 | 562    | 2.215   |
| GPR141    | ENSG00000187037 | 562    | 0       |
| NME8      | ENSG00000086288 | 562    | 0       |
| ELOVL5    | ENSG00000012660 | 561.5  | 74.265  |
| GLDC      | ENSG00000178445 | 561.5  | 17.735  |
| CEP89     | ENSG00000121289 | 561.5  | 13.81   |

|             |                 |       |         |
|-------------|-----------------|-------|---------|
| ARNTL2      | ENSG00000029153 | 561.5 | 11.1    |
| PLCL2       | ENSG00000154822 | 561.5 | 7.005   |
| WDR5B       | ENSG00000196981 | 561.5 | 2.865   |
| NOS2P3      | ENSG00000230528 | 561.5 | 0.36    |
| SPANXA2     | ENSG00000203926 | 561.5 | 0       |
| SPANXA2-OT1 | ENSG00000226574 | 561.5 | 0       |
| MTIF2       | ENSG00000085760 | 561   | 52.955  |
| KAT6A       | ENSG00000083168 | 561   | 25.64   |
| LONRF3      | ENSG00000175556 | 561   | 14.84   |
| MPPED1      | ENSG00000186732 | 561   | 1.045   |
| FRMPD3      | ENSG00000147234 | 561   | 0.835   |
| KLHL33      | ENSG00000185271 | 561   | 0       |
| RABEP1      | ENSG00000029725 | 560.5 | 60.55   |
| RABGAP1     | ENSG00000011454 | 560.5 | 27.375  |
| SH3PXD2B    | ENSG00000174705 | 560.5 | 16.43   |
| TTC28       | ENSG00000100154 | 560.5 | 13.4    |
| THEGL       | ENSG00000249693 | 560.5 | 0.53    |
| GPR21       | ENSG00000188394 | 560.5 | 0.215   |
| GLDCP1      | ENSG00000248590 | 560.5 | 0.035   |
| PDCL2       | ENSG00000163440 | 560.5 | 0       |
| POM121C     | ENSG00000135213 | 560   | 84.36   |
| SIK3        | ENSG00000160584 | 560   | 16.615  |
| RHOT1       | ENSG00000126858 | 560   | 11.965  |
| SIK3-IT1    | ENSG00000231865 | 560   | 0.53    |
| ZNF197      | ENSG00000186448 | 559.5 | 11.97   |
| ZKSCAN7     | ENSG00000196345 | 559.5 | 0.925   |
| ZNF660      | ENSG00000144792 | 559.5 | 0.74    |
| ZFHx4-AS1   | ENSG00000253661 | 559.5 | 0.68    |
| DNAJC5G     | ENSG00000163793 | 559.5 | 0.39    |
| ZNF197-AS1  | ENSG00000233509 | 559.5 | 0.32    |
| LINC00501   | ENSG00000203645 | 559.5 | 0       |
| TAF15       | ENSG00000172660 | 559   | 132.975 |
| MRPS22      | ENSG00000175110 | 559   | 77.65   |
| BMP6        | ENSG00000153162 | 559   | 3.89    |
| BPESC1      | ENSG00000232416 | 559   | 0.015   |
| NFE2L1      | ENSG00000082641 | 558   | 74.85   |
| MYCBP2      | ENSG00000005810 | 558   | 69.1    |
| GPI         | ENSG00000105220 | 557.5 | 308.86  |
| PDCD2L      | ENSG00000126249 | 557.5 | 36.455  |
| ANO1        | ENSG00000131620 | 557.5 | 0.34    |
| WDR43       | ENSG00000163811 | 557   | 165.775 |
| SNRNP40     | ENSG00000060688 | 557   | 99.16   |
| SOS1        | ENSG00000115904 | 557   | 38.32   |
| ANO8        | ENSG00000074855 | 557   | 7.02    |
| IL17RD      | ENSG00000144730 | 557   | 4.055   |
| ZNF30       | ENSG00000168661 | 557   | 3.475   |
| SOS1-IT1    | ENSG00000229692 | 557   | 3.41    |

|              |                 |       |        |
|--------------|-----------------|-------|--------|
| SH3RF2       | ENSG00000156463 | 557   | 0.97   |
| TSHR         | ENSG00000165409 | 557   | 0.265  |
| NMNAT1P1     | ENSG00000259167 | 557   | 0      |
| EXT1         | ENSG00000182197 | 556.5 | 22.12  |
| N4BP1        | ENSG00000102921 | 556   | 31.555 |
| DPY19L4      | ENSG00000156162 | 556   | 20.145 |
| C21orf49     | ENSG00000205930 | 556   | 0.89   |
| RPS2P44      | ENSG00000243609 | 556   | 0.46   |
| PDCD1LG2     | ENSG00000197646 | 556   | 0.03   |
| NPIPB3       | ENSG00000169246 | 555.5 | 68.53  |
| ATRX         | ENSG00000085224 | 555.5 | 39.57  |
| PLIN2        | ENSG00000147872 | 555.5 | 25.69  |
| SLC7A5P2     | ENSG00000258186 | 555.5 | 8.575  |
| DPH6         | ENSG00000134146 | 555.5 | 7.795  |
| SERINC5      | ENSG00000164300 | 555.5 | 5.78   |
| PRICKLE2     | ENSG00000163637 | 555.5 | 0.585  |
| SAMM50       | ENSG00000100347 | 555   | 45.535 |
| PARVB        | ENSG00000188677 | 555   | 26.9   |
| PNPLA3       | ENSG00000100344 | 555   | 13.125 |
| GABRR2       | ENSG00000111886 | 555   | 0.44   |
| IKZF1        | ENSG00000185811 | 555   | 0.09   |
| PAPL         | ENSG00000183760 | 555   | 0.02   |
| PRMT2        | ENSG00000160310 | 554.5 | 52.225 |
| RAPGEF2      | ENSG00000109756 | 554.5 | 25.355 |
| SGK3         | ENSG00000104205 | 554.5 | 11.43  |
| C8orf44      | ENSG00000213865 | 554.5 | 2.51   |
| C8orf44-SGK3 | ENSG00000270024 | 554.5 | 0.955  |
| RPL23AP82    | ENSG00000184319 | 554   | 37.465 |
| ASCC1        | ENSG00000138303 | 554   | 30.69  |
| SMO          | ENSG00000128602 | 553.5 | 24.07  |
| MTHFD2L      | ENSG00000163738 | 553.5 | 9.86   |
| LRRC1        | ENSG00000137269 | 553.5 | 7.995  |
| ABCG2        | ENSG00000118777 | 553.5 | 1.19   |
| CDH9         | ENSG00000113100 | 553.5 | 0.125  |
| KCNC2        | ENSG00000166006 | 553.5 | 0.02   |
| RNU6ATAC31P  | ENSG00000221440 | 553.5 | 0      |
| VRK3         | ENSG00000105053 | 553   | 30.755 |
| SLC6A14      | ENSG00000087916 | 553   | 0      |
| RALY         | ENSG00000125970 | 552.5 | 71.815 |
| FAR1         | ENSG00000197601 | 552.5 | 62.22  |
| FAR1-IT1     | ENSG00000254791 | 552.5 | 3.58   |
| SUN1         | ENSG00000164828 | 552   | 63.575 |
| GET4         | ENSG00000239857 | 552   | 31.155 |
| ENPP3        | ENSG00000154269 | 552   | 0.435  |
| AMPD1        | ENSG00000116748 | 552   | 0.05   |
| LSG1         | ENSG00000041802 | 551.5 | 35.62  |
| TMEM180      | ENSG00000138111 | 551.5 | 17.395 |

|             |                  |       |        |
|-------------|------------------|-------|--------|
| GEMIN7      | ENSG00000142252  | 551   | 43.8   |
| MARK4       | ENSG00000007047  | 551   | 22.955 |
| ALG9        | ENSG000000086848 | 551   | 20.63  |
| ACADSB      | ENSG00000196177  | 551   | 17.78  |
| PPP1R37     | ENSG00000104866  | 551   | 17.03  |
| BLOC1S3     | ENSG00000189114  | 551   | 11.67  |
| PRKAR2B     | ENSG00000005249  | 551   | 11.205 |
| FDXACB1     | ENSG00000255561  | 551   | 2.95   |
| STXBP5L     | ENSG00000145087  | 551   | 2.63   |
| EIF5AP3     | ENSG00000267346  | 551   | 0.735  |
| ALG9-IT1    | ENSG00000254450  | 551   | 0.375  |
| DPY19L1     | ENSG00000173852  | 550.5 | 19.495 |
| PSEN2       | ENSG00000143801  | 550   | 26.555 |
| TCF4        | ENSG00000196628  | 550   | 19.33  |
| CPT1A       | ENSG00000110090  | 550   | 13.44  |
| MYLPF       | ENSG00000180209  | 550   | 0.635  |
| Metazoa_SRP | ENSG00000272096  | 550   | 0      |
| TNFRSF11B   | ENSG00000164761  | 550   | 0      |
| PAG1        | ENSG00000076641  | 549.5 | 11.355 |
| MBD3L1      | ENSG00000170948  | 549.5 | 0      |
| UBE2H       | ENSG00000186591  | 549   | 30.3   |
| MFAP3       | ENSG00000037749  | 549   | 23.005 |
| GALNT10     | ENSG00000164574  | 549   | 11.115 |
| ITPRIPL2    | ENSG00000205730  | 549   | 9.9    |
| SYT17       | ENSG00000103528  | 549   | 2.085  |
| BPGM        | ENSG00000172331  | 548.5 | 21.28  |
| AFF1        | ENSG00000172493  | 548.5 | 20.055 |
| DECR1       | ENSG00000104325  | 548.5 | 18.095 |
| CYP20A1     | ENSG00000119004  | 548.5 | 16.82  |
| SOX30       | ENSG00000039600  | 548.5 | 0.185  |
| UBR5        | ENSG00000104517  | 548   | 61.935 |
| TFE3        | ENSG00000068323  | 548   | 22.885 |
| DNAJC6      | ENSG00000116675  | 548   | 11.52  |
| TCP11X3P    | ENSG00000251525  | 548   | 0      |
| JADE1       | ENSG00000077684  | 547.5 | 20.67  |
| CKMT2-AS1   | ENSG00000247572  | 547.5 | 9.295  |
| GRB14       | ENSG00000115290  | 547.5 | 5      |
| GRIN1       | ENSG00000176884  | 547.5 | 1.74   |
| KCTD8       | ENSG00000183783  | 547.5 | 0.17   |
| KRT16P4     | ENSG00000229526  | 547.5 | 0      |
| TNPO1P2     | ENSG00000230662  | 547.5 | 0      |
| RHOA        | ENSG00000067560  | 547   | 476.52 |
| SPRTN       | ENSG00000010072  | 547   | 57.35  |
| WSB2        | ENSG00000176871  | 547   | 31.12  |
| CMC1        | ENSG00000187118  | 547   | 17.35  |
| ARRDC4      | ENSG00000140450  | 547   | 9.68   |
| BBS9        | ENSG00000122507  | 547   | 9.48   |

|            |                 |       |         |
|------------|-----------------|-------|---------|
| SAMD5      | ENSG00000203727 | 547   | 3.505   |
| DDX11L1    | ENSG00000223972 | 547   | 0.12    |
| ADAM29     | ENSG00000168594 | 547   | 0       |
| SYNGAP1    | ENSG00000197283 | 546.5 | 9.97    |
| SRD5A3-AS1 | ENSG00000249700 | 546.5 | 2.025   |
| VIPR2      | ENSG00000106018 | 546.5 | 0.22    |
| C1orf186   | ENSG00000196533 | 546.5 | 0.205   |
| C9orf84    | ENSG00000165181 | 546.5 | 0.135   |
| OR4N2      | ENSG00000176294 | 546.5 | 0.13    |
| OR4H12P    | ENSG00000176312 | 546.5 | 0       |
| OR4M1      | ENSG00000176299 | 546.5 | 0       |
| OR4N1P     | ENSG00000258564 | 546.5 | 0       |
| MCM3       | ENSG00000112118 | 546   | 149.355 |
| RQCD1      | ENSG00000144580 | 546   | 66.88   |
| NDE1       | ENSG00000072864 | 546   | 41.525  |
| ROR1       | ENSG00000185483 | 546   | 6.92    |
| GRIN3A     | ENSG00000198785 | 546   | 0.305   |
| TF         | ENSG00000091513 | 546   | 0.215   |
| TFP1       | ENSG00000242337 | 546   | 0.04    |
| PPP3R2     | ENSG00000188386 | 546   | 0.02    |
| GPR112     | ENSG00000156920 | 546   | 0       |
| DLEU1      | ENSG00000176124 | 545.5 | 22.665  |
| ONECUT2    | ENSG00000119547 | 545.5 | 8.56    |
| RPL18P10   | ENSG00000214359 | 545.5 | 1.735   |
| ST13P4     | ENSG00000232150 | 545.5 | 0.955   |
| RHOBTB1    | ENSG00000072422 | 545   | 6.02    |
| RNU2-72P   | ENSG00000223107 | 545   | 0       |
| ESYT2      | ENSG00000117868 | 544.5 | 33.67   |
| SHROOM1    | ENSG00000164403 | 544.5 | 8.385   |
| FAM19A4    | ENSG00000163377 | 544.5 | 0.025   |
| CUL3       | ENSG00000036257 | 544   | 61.365  |
| CKMT1B     | ENSG00000237289 | 544   | 58.485  |
| CPVL       | ENSG00000106066 | 544   | 32.3    |
| SH3KBP1    | ENSG00000147010 | 544   | 19.085  |
| TFEC       | ENSG00000105967 | 544   | 0.01    |
| HSPD1      | ENSG00000144381 | 543.5 | 676.745 |
| TSPAN33    | ENSG00000158457 | 543.5 | 10.535  |
| ATF7IP2    | ENSG00000166669 | 543.5 | 9.325   |
| ITPR2      | ENSG00000123104 | 543.5 | 8.255   |
| PCCA       | ENSG00000175198 | 543.5 | 7.695   |
| NFKBID     | ENSG00000167604 | 543.5 | 7.165   |
| GSK3B      | ENSG00000082701 | 543   | 45.875  |
| ESF1       | ENSG00000089048 | 543   | 31.025  |
| GABRB3     | ENSG00000166206 | 543   | 17.635  |
| EPM2A      | ENSG00000112425 | 543   | 1.51    |
| PLD2       | ENSG00000129219 | 542.5 | 15.58   |
| MFAP3L     | ENSG00000198948 | 542.5 | 5.175   |

|            |                 |       |        |
|------------|-----------------|-------|--------|
| PRR16      | ENSG00000184838 | 542.5 | 0.945  |
| ABCG8      | ENSG00000143921 | 542.5 | 0.025  |
| BRI3       | ENSG00000164713 | 542   | 63.345 |
| EMB        | ENSG00000170571 | 542   | 15.06  |
| DNAJC3     | ENSG00000102580 | 542   | 12.52  |
| MTCYBP3    | ENSG00000232373 | 542   | 0.22   |
| RDX        | ENSG00000137710 | 541.5 | 127.26 |
| GNG12      | ENSG00000172380 | 541.5 | 27.17  |
| STAT6      | ENSG00000166888 | 541.5 | 19.995 |
| C17orf78   | ENSG00000167230 | 541.5 | 0.26   |
| ACTA2      | ENSG00000107796 | 541   | 1.94   |
| SYN1       | ENSG00000008056 | 541   | 0.97   |
| GRAMD3     | ENSG00000155324 | 541   | 0.89   |
| MLF1       | ENSG00000178053 | 540.5 | 31.005 |
| SHANK2-AS2 | ENSG00000236262 | 540.5 | 0      |
| FAM49B     | ENSG00000153310 | 540   | 66.75  |
| RBBP8      | ENSG00000101773 | 540   | 55.13  |
| IWS1       | ENSG00000163166 | 540   | 45.065 |
| PPP1R16A   | ENSG00000160972 | 540   | 18.655 |
| EEF2K      | ENSG00000103319 | 540   | 18.34  |
| PTPRB      | ENSG00000127329 | 540   | 0.535  |
| DDX11L9    | ENSG00000248472 | 540   | 0.205  |
| C1orf110   | ENSG00000185860 | 540   | 0.07   |
| QRSL1P2    | ENSG00000227613 | 540   | 0      |
| LINC00882  | ENSG00000242759 | 539.5 | 0.375  |
| MTND4P16   | ENSG00000241787 | 539.5 | 0.345  |
| CCDC14     | ENSG00000175455 | 539   | 63.31  |
| CHIC2      | ENSG00000109220 | 539   | 11.69  |
| NECAB2     | ENSG00000103154 | 539   | 1.935  |
| CDK13      | ENSG00000065883 | 538.5 | 28.865 |
| PGGT1B     | ENSG00000164219 | 538.5 | 18.435 |
| UPF2       | ENSG00000151461 | 538   | 30.035 |
| POT1-AS1   | ENSG00000224897 | 538   | 0.485  |
| EEF1GP1    | ENSG00000186676 | 538   | 0.145  |
| ALAS2      | ENSG00000158578 | 538   | 0.13   |
| PLD5       | ENSG00000180287 | 538   | 0      |
| STK32B     | ENSG00000152953 | 538   | 0      |
| VAMP1      | ENSG00000139190 | 537.5 | 11.115 |
| TAPBPL     | ENSG00000139192 | 537.5 | 2.38   |
| SCN9A      | ENSG00000169432 | 537.5 | 1.375  |
| DUSP26     | ENSG00000133878 | 537.5 | 0.27   |
| CD27       | ENSG00000139193 | 537.5 | 0.19   |
| ITGBL1     | ENSG00000198542 | 537.5 | 0      |
| MCTP2      | ENSG00000140563 | 537.5 | 0      |
| KIAA0556   | ENSG00000047578 | 537   | 11.495 |
| SULF1      | ENSG00000137573 | 537   | 8.275  |
| RNF144B    | ENSG00000137393 | 537   | 1.58   |

|                   |                 |        |         |
|-------------------|-----------------|--------|---------|
| BOK               | ENSG00000176720 | 537    | 0.72    |
| LINC00358         | ENSG00000229578 | 537    | 0       |
| MTHFD1L           | ENSG00000120254 | 536.5  | 62.645  |
| ZNF362            | ENSG00000160094 | 536.5  | 30.605  |
| RNU6-302P         | ENSG00000202119 | 536.5  | 1.04    |
| VN2R1P            | ENSG00000174930 | 536.5  | 0       |
| SUPT4H1           | ENSG00000213246 | 536    | 97.905  |
| ZNF354A           | ENSG00000169131 | 536    | 13.345  |
| NACC2             | ENSG00000148411 | 536    | 12.12   |
| KRT8              | ENSG00000170421 | 536    | 7.245   |
| RNF43             | ENSG00000108375 | 536    | 4.595   |
| BZRAP1-AS1        | ENSG00000265148 | 536    | 0.34    |
| TNFRSF8           | ENSG00000120949 | 536    | 0.15    |
| RPL21P122         | ENSG00000241185 | 536    | 0.145   |
| PMS2P3            | ENSG00000127957 | 535.75 | 6.83    |
| HDGFRP3           | ENSG00000166503 | 535    | 66.845  |
| METTL16           | ENSG00000127804 | 535    | 35.985  |
| KIAA0247          | ENSG00000100647 | 535    | 4.19    |
| AGT               | ENSG00000135744 | 535    | 0       |
| FRMPD3-AS1        | ENSG00000227610 | 535    | 0       |
| C15orf57          | ENSG00000128891 | 534.5  | 13.91   |
| POLH              | ENSG00000170734 | 534.5  | 11.88   |
| PRKAA2            | ENSG00000162409 | 534.5  | 10.68   |
| SYT7              | ENSG00000011347 | 534.5  | 2.16    |
| CCNJL             | ENSG00000135083 | 534.5  | 2.115   |
| CDH20             | ENSG00000101542 | 534.5  | 0.02    |
| ELOVL3            | ENSG00000119915 | 534.5  | 0       |
| POLR2F            | ENSG00000100142 | 534    | 149.8   |
| ADAR              | ENSG00000160710 | 534    | 116.655 |
| WDR26             | ENSG00000162923 | 534    | 96.555  |
| FBN2              | ENSG00000138829 | 534    | 25.72   |
| BLOC1S6           | ENSG00000104164 | 534    | 24.42   |
| CUL9              | ENSG00000112659 | 534    | 11.275  |
| SQRDL             | ENSG00000137767 | 534    | 0.74    |
| ZMPSTE24          | ENSG00000084073 | 533.5  | 41.13   |
| STAT2             | ENSG00000170581 | 533.5  | 20.625  |
| ESPNL             | ENSG00000144488 | 533.5  | 3.435   |
| PITPNM2           | ENSG00000090975 | 533.5  | 2.095   |
| PTK2              | ENSG00000169398 | 533    | 62.335  |
| NDRG2             | ENSG00000165795 | 533    | 18.095  |
| BRINP3            | ENSG00000162670 | 533    | 4.43    |
| DTX2P1            | ENSG00000186704 | 533    | 3.495   |
| LRRC7             | ENSG00000033122 | 533    | 2.575   |
| FGGY              | ENSG00000172456 | 533    | 2.34    |
| CCDC146           | ENSG00000135205 | 533    | 1.345   |
| DTX2P1-UPK3BP1-P1 | ENSG00000265479 | 533    | 1.22    |
| UPK3B             | ENSG00000243566 | 533    | 0.77    |

|            |                 |       |         |
|------------|-----------------|-------|---------|
| METTL24    | ENSG00000053328 | 533   | 0.45    |
| HRH4       | ENSG00000134489 | 533   | 0.14    |
| PIN1P1     | ENSG00000229359 | 533   | 0       |
| PMS2P11    | ENSG00000241350 | 533   | 0       |
| PMS2P9     | ENSG00000233448 | 533   | 0       |
| RNASE13    | ENSG00000206150 | 533   | 0       |
| SCGB1C1    | ENSG00000188076 | 533   | 0       |
| TPPP2      | ENSG00000179636 | 533   | 0       |
| SNX3       | ENSG00000112335 | 532.5 | 143.56  |
| ARMC8      | ENSG00000114098 | 532.5 | 28.075  |
| RNF121     | ENSG00000137522 | 532.5 | 24.89   |
| PPCDC      | ENSG00000138621 | 532.5 | 24.8    |
| GTF2E1     | ENSG00000153767 | 532.5 | 13.545  |
| LAT2       | ENSG00000086730 | 532.5 | 1.86    |
| PEX5L      | ENSG00000114757 | 532.5 | 0.36    |
| PHEX       | ENSG00000102174 | 532.5 | 0.215   |
| IL12A-AS1  | ENSG00000244040 | 532.5 | 0.025   |
| HEPHL1     | ENSG00000181333 | 532.5 | 0.01    |
| EXOC6B     | ENSG00000144036 | 532   | 12.33   |
| RIMS2      | ENSG00000176406 | 532   | 0.78    |
| PDE4B      | ENSG00000184588 | 532   | 0.715   |
| GUSBP5     | ENSG00000236296 | 532   | 0.28    |
| FREM3      | ENSG00000183090 | 532   | 0.02    |
| COX5A      | ENSG00000178741 | 531.5 | 296.1   |
| PBX1       | ENSG00000185630 | 531.5 | 38.73   |
| TEC        | ENSG00000135605 | 531.5 | 1.77    |
| TCP11      | ENSG00000124678 | 531.5 | 0.07    |
| TOMM5      | ENSG00000175768 | 531   | 133.525 |
| FAM120A    | ENSG00000048828 | 531   | 101.985 |
| EXOSC3     | ENSG00000107371 | 531   | 64.21   |
| SHB        | ENSG00000107338 | 531   | 21.23   |
| FAM65A     | ENSG00000039523 | 531   | 19.475  |
| SLC25A51   | ENSG00000122696 | 531   | 18.69   |
| DCAF10     | ENSG00000122741 | 531   | 17.64   |
| FBXO10     | ENSG00000147912 | 531   | 13.16   |
| VEPH1      | ENSG00000197415 | 531   | 0.12    |
| SPDYE7P    | ENSG00000179994 | 531   | 0       |
| COPG2      | ENSG00000158623 | 530.5 | 41.97   |
| CDC14A     | ENSG00000079335 | 530.5 | 6.2     |
| MAP3K5     | ENSG00000197442 | 530.5 | 4.965   |
| GAP43      | ENSG00000172020 | 530.5 | 1.03    |
| RNU6-1056P | ENSG00000206723 | 530.5 | 0       |
| TSGA13     | ENSG00000213265 | 530.5 | 0       |
| CPE        | ENSG00000109472 | 530   | 44.38   |
| TRPC4AP    | ENSG00000100991 | 530   | 43.41   |
| TCFL5      | ENSG00000101190 | 530   | 16.88   |
| SEC16B     | ENSG00000120341 | 530   | 0.125   |

|            |                 |       |        |
|------------|-----------------|-------|--------|
| TIMM44     | ENSG00000104980 | 529.5 | 103.06 |
| CREBBP     | ENSG00000005339 | 529.5 | 59.88  |
| STOML1     | ENSG00000067221 | 529.5 | 5.305  |
| PRKD3      | ENSG00000115825 | 529   | 48.745 |
| IQGAP2     | ENSG00000145703 | 529   | 13.095 |
| LINC01102  | ENSG00000235597 | 529   | 0      |
| UTP20      | ENSG00000120800 | 528.5 | 25.41  |
| XYLB       | ENSG00000093217 | 528.5 | 24.375 |
| FAM171A1   | ENSG00000148468 | 528.5 | 19.97  |
| LMTK3      | ENSG00000142235 | 528.5 | 1.745  |
| LRRC72     | ENSG00000205858 | 528.5 | 0      |
| PCSK6      | ENSG00000140479 | 528   | 45.75  |
| DLX1       | ENSG00000144355 | 528   | 24.7   |
| ARVCF      | ENSG00000099889 | 528   | 8.615  |
| ACSS3      | ENSG00000111058 | 528   | 2.52   |
| APCDD1L    | ENSG00000198768 | 528   | 0.255  |
| INSL6      | ENSG00000120210 | 528   | 0.24   |
| COL9A1     | ENSG00000112280 | 528   | 0.16   |
| FMOD       | ENSG00000122176 | 528   | 0.02   |
| DDX10P2    | ENSG00000230360 | 527.5 | 0.15   |
| VEZT       | ENSG00000028203 | 527   | 42.015 |
| CHKA       | ENSG00000110721 | 527   | 29.215 |
| SLC25A42   | ENSG00000181035 | 527   | 7.54   |
| COL21A1    | ENSG00000124749 | 527   | 0.94   |
| SLC29A1    | ENSG00000112759 | 526.5 | 56.435 |
| TAOK2      | ENSG00000149930 | 526.5 | 45.485 |
| STAG3L2    | ENSG00000160828 | 526.5 | 24.92  |
| CEP70      | ENSG00000114107 | 526.5 | 20.935 |
| GTF2IRD2   | ENSG00000196275 | 526.5 | 4.915  |
| PHBP15     | ENSG00000232210 | 526.5 | 2.26   |
| UGT1A13P   | ENSG00000234143 | 526.5 | 0.085  |
| UGT1A10    | ENSG00000242515 | 526.5 | 0.03   |
| DUX4L19    | ENSG00000258991 | 526.5 | 0      |
| NCF1       | ENSG00000158517 | 526.5 | 0      |
| UGT1A1     | ENSG00000242366 | 526.5 | 0      |
| UGT1A2P    | ENSG00000228445 | 526.5 | 0      |
| UGT1A3     | ENSG00000243135 | 526.5 | 0      |
| UGT1A4     | ENSG00000244474 | 526.5 | 0      |
| UGT1A5     | ENSG00000240224 | 526.5 | 0      |
| UGT1A6     | ENSG00000167165 | 526.5 | 0      |
| UGT1A7     | ENSG00000244122 | 526.5 | 0      |
| UGT1A8     | ENSG00000241635 | 526.5 | 0      |
| UGT1A9     | ENSG00000241119 | 526.5 | 0      |
| SHC1       | ENSG00000160691 | 526   | 34.45  |
| PYGO2      | ENSG00000163348 | 526   | 33.355 |
| C2orf76    | ENSG00000186132 | 526   | 9.075  |
| STXBP5-AS1 | ENSG00000233452 | 526   | 0.22   |

|                  |                 |       |          |
|------------------|-----------------|-------|----------|
| NDUFS2           | ENSG00000158864 | 525.5 | 124.495  |
| SLC44A3          | ENSG00000143036 | 525.5 | 2.88     |
| TPM3P6           | ENSG00000250731 | 525.5 | 0.705    |
| ZNF813           | ENSG00000198346 | 525.5 | 0.07     |
| ALDOA            | ENSG00000149925 | 525   | 1097.925 |
| PDXDC1           | ENSG00000179889 | 525   | 69.395   |
| YLPM1            | ENSG00000119596 | 525   | 65.18    |
| RPS6KB1          | ENSG00000108443 | 525   | 43.525   |
| STC2             | ENSG00000113739 | 525   | 27.055   |
| ECE1             | ENSG00000117298 | 525   | 25.095   |
| RNFT1            | ENSG00000189050 | 525   | 19.285   |
| ZDHHC23          | ENSG00000184307 | 525   | 8.945    |
| LBX2             | ENSG00000179528 | 525   | 3.37     |
| UBE2CP2          | ENSG00000265939 | 525   | 1.31     |
| CD160            | ENSG00000117281 | 525   | 1.245    |
| PARP10           | ENSG00000178685 | 525   | 1.02     |
| DHX40P1          | ENSG00000266992 | 525   | 0.345    |
| DSCR8            | ENSG00000198054 | 525   | 0.155    |
| KCNJ15           | ENSG00000157551 | 525   | 0.005    |
| ARHGAP15         | ENSG00000075884 | 525   | 0        |
| DSCR10           | ENSG00000233316 | 525   | 0        |
| MTND6P11         | ENSG00000226839 | 525   | 0        |
| SLC5A10          | ENSG00000154025 | 525   | 0        |
| TBC1D3P1         | ENSG00000238283 | 525   | 0        |
| TBC1D3P1-DHX40P1 | ENSG00000267104 | 525   | 0        |
| SF3A1            | ENSG00000099995 | 524.5 | 336.195  |
| NRD1             | ENSG00000078618 | 524.5 | 77.68    |
| RSBN1            | ENSG00000081019 | 524.5 | 16.245   |
| KIF6             | ENSG00000164627 | 524.5 | 2.885    |
| C2orf27A         | ENSG00000197927 | 524.5 | 2.255    |
| DPRX             | ENSG00000204595 | 524.5 | 0        |
| GALNT13          | ENSG00000144278 | 524   | 9.465    |
| SETDB2           | ENSG00000136169 | 524   | 4.935    |
| BAALC            | ENSG00000164929 | 524   | 1.12     |
| PHBP4            | ENSG00000230251 | 524   | 0.66     |
| PGM5             | ENSG00000154330 | 524   | 0.565    |
| GPR173           | ENSG00000184194 | 524   | 0        |
| GUCY2F           | ENSG00000101890 | 524   | 0        |
| MIR3151          | ENSG00000265657 | 524   | 0        |
| PRG3             | ENSG00000156575 | 524   | 0        |
| SCEL             | ENSG00000136155 | 524   | 0        |
| SERPINB11        | ENSG00000206072 | 524   | 0        |
| ANKS1A           | ENSG00000064999 | 523.5 | 17.145   |
| ITGAL            | ENSG00000005844 | 523.5 | 0.195    |
| CAPSL            | ENSG00000152611 | 523.5 | 0        |
| DNAJB6           | ENSG00000105993 | 523   | 165.245  |
| LMNB1            | ENSG00000113368 | 523   | 135.215  |

|             |                 |       |        |
|-------------|-----------------|-------|--------|
| FBXO28      | ENSG00000143756 | 523   | 38.72  |
| MDGA2       | ENSG00000139915 | 523   | 3.08   |
| CPLX2       | ENSG00000145920 | 523   | 1.155  |
| ALOX5       | ENSG00000012779 | 523   | 0.54   |
| RPL13AP2    | ENSG00000244053 | 523   | 0.255  |
| SP7         | ENSG00000170374 | 523   | 0      |
| LARP4       | ENSG00000161813 | 522.5 | 55.22  |
| TEX10       | ENSG00000136891 | 522.5 | 37.31  |
| LRFN1       | ENSG00000128011 | 522.5 | 15.525 |
| FGD3        | ENSG00000127084 | 522.5 | 2.225  |
| CD44        | ENSG00000026508 | 522.5 | 0.18   |
| NOL10       | ENSG00000115761 | 522   | 43.07  |
| MRPS6       | ENSG00000243927 | 522   | 34.17  |
| FKBP14      | ENSG00000106080 | 522   | 17.945 |
| DBT         | ENSG00000137992 | 522   | 10.765 |
| SLC5A3      | ENSG00000272962 | 522   | 6.715  |
| ADAM8       | ENSG00000151651 | 522   | 1.645  |
| LINC00310   | ENSG00000227456 | 522   | 0.785  |
| NCF1C       | ENSG00000165178 | 522   | 0.09   |
| PACSIN2     | ENSG00000100266 | 521.5 | 33.965 |
| ARFGAP3     | ENSG00000242247 | 521.5 | 31.6   |
| ANKRD19P    | ENSG00000187984 | 521.5 | 26.385 |
| RPS6KA5     | ENSG00000100784 | 521.5 | 8.625  |
| ZNF484      | ENSG00000127081 | 521.5 | 5.675  |
| SNHG14      | ENSG00000224078 | 521.5 | 0.555  |
| CLDN4       | ENSG00000189143 | 521.5 | 0.315  |
| SNURF       | ENSG00000273173 | 521.5 | 0.08   |
| SNORD109B   | ENSG00000239169 | 521.5 | 0      |
| SNORD115-16 | ENSG00000200757 | 521.5 | 0      |
| SNORD115-19 | ENSG00000199968 | 521.5 | 0      |
| SNORD115-35 | ENSG00000201992 | 521.5 | 0      |
| SNORD115-47 | ENSG00000212528 | 521.5 | 0      |
| SNORD115-48 | ENSG00000201634 | 521.5 | 0      |
| SNORD115-5  | ENSG00000200503 | 521.5 | 0      |
| SNORD116-2  | ENSG00000207001 | 521.5 | 0      |
| SNORD116-25 | ENSG00000252326 | 521.5 | 0      |
| SNORD116-29 | ENSG00000207245 | 521.5 | 0      |
| SNORD116-3  | ENSG00000207014 | 521.5 | 0      |
| SNORD116-5  | ENSG00000207191 | 521.5 | 0      |
| SNORD116-7  | ENSG00000207133 | 521.5 | 0      |
| SNRPN       | ENSG00000128739 | 521.5 | 0      |
| STX18-AS1   | ENSG00000247708 | 521   | 6.96   |
| CDS1        | ENSG00000163624 | 521   | 6.85   |
| C14orf23    | ENSG00000186960 | 521   | 0.705  |
| MTX1P1      | ENSG00000236675 | 521   | 0.7    |
| THSD7A      | ENSG00000005108 | 521   | 0.35   |
| BCL2L14     | ENSG00000121380 | 521   | 0.345  |

|              |                 |       |         |
|--------------|-----------------|-------|---------|
| MUC7         | ENSG00000171195 | 521   | 0.115   |
| ZNF93        | ENSG00000184635 | 521   | 0.1     |
| CSNK1A1      | ENSG00000113712 | 520.5 | 193.34  |
| HUS1         | ENSG00000136273 | 520.5 | 22.95   |
| PRDM2        | ENSG00000116731 | 520.5 | 21.355  |
| GRID1        | ENSG00000182771 | 520.5 | 2.605   |
| SLC25A18     | ENSG00000182902 | 520.5 | 0.975   |
| PKD1L1       | ENSG00000158683 | 520.5 | 0.135   |
| MIR346       | ENSG00000199104 | 520.5 | 0       |
| TACC1P1      | ENSG00000224920 | 520.5 | 0       |
| UFL1-AS1     | ENSG00000233797 | 520.5 | 0       |
| COX5B        | ENSG00000135940 | 520   | 180.295 |
| HPCAL1       | ENSG00000115756 | 520   | 19.545  |
| MON2         | ENSG00000061987 | 520   | 18.685  |
| PEX7         | ENSG00000112357 | 520   | 6.755   |
| ZNF44        | ENSG00000197857 | 520   | 2.19    |
| FGD4         | ENSG00000139132 | 520   | 1.745   |
| CXCL17       | ENSG00000189377 | 520   | 0.635   |
| NOS1         | ENSG00000089250 | 520   | 0.275   |
| FCRL6        | ENSG00000181036 | 520   | 0       |
| TBC1D23      | ENSG00000036054 | 519.5 | 20.095  |
| ZSWIM5       | ENSG00000162415 | 519.5 | 4.345   |
| GCKR         | ENSG00000084734 | 519.5 | 0.095   |
| OSTCP5       | ENSG00000234315 | 519.5 | 0       |
| MED15        | ENSG00000099917 | 519   | 53.225  |
| PLEKHA1      | ENSG00000107679 | 519   | 17.495  |
| RGS14        | ENSG00000169220 | 519   | 13.985  |
| C10orf76     | ENSG00000120029 | 519   | 12.015  |
| TVP23C       | ENSG00000175106 | 519   | 11.59   |
| CDRT4        | ENSG00000239704 | 519   | 9.465   |
| SIPA1L2      | ENSG00000116991 | 519   | 8.275   |
| TVP23C-CDRT4 | ENSG00000259024 | 519   | 0.625   |
| PLVAP        | ENSG00000130300 | 519   | 0.275   |
| LRRC37A14P   | ENSG00000215771 | 519   | 0.165   |
| ACTN4        | ENSG00000130402 | 518.5 | 175.825 |
| TCF25        | ENSG00000141002 | 518.5 | 104.94  |
| ZFAND6       | ENSG00000086666 | 518.5 | 56.035  |
| ARHGAP11A    | ENSG00000198826 | 518.5 | 51.285  |
| STK4         | ENSG00000101109 | 518.5 | 33.675  |
| COG4         | ENSG00000103051 | 518.5 | 17.375  |
| C14orf159    | ENSG00000133943 | 518.5 | 10.22   |
| MC1R         | ENSG00000258839 | 518.5 | 3.52    |
| TUBB3        | ENSG00000198211 | 518.5 | 1.445   |
| SCNN1B       | ENSG00000168447 | 518.5 | 0.11    |
| ZNF282       | ENSG00000170265 | 518   | 56.07   |
| DRAM1        | ENSG00000136048 | 518   | 1.1     |
| MARK3        | ENSG00000075413 | 517.5 | 60.155  |

|            |                 |        |         |
|------------|-----------------|--------|---------|
| SEL1L3     | ENSG00000091490 | 517.5  | 6.655   |
| SPEF1      | ENSG00000101222 | 517.5  | 0.635   |
| THSD7B     | ENSG00000144229 | 517.5  | 0       |
| FXN        | ENSG00000165060 | 517    | 63.34   |
| METTL9     | ENSG00000197006 | 517    | 47.39   |
| CASC16     | ENSG00000249231 | 516.5  | 0       |
| COX6A1     | ENSG00000111775 | 516    | 371.22  |
| WLS        | ENSG00000116729 | 516    | 89.445  |
| GATC       | ENSG00000257218 | 516    | 52.135  |
| TTLL11     | ENSG00000175764 | 516    | 8.225   |
| EPHB2      | ENSG00000133216 | 516    | 7.44    |
| SLC1A1     | ENSG00000106688 | 516    | 5.44    |
| CTBP2P8    | ENSG00000234383 | 516    | 1.64    |
| GNG12-AS1  | ENSG00000232284 | 516    | 1.37    |
| TTLL11-IT1 | ENSG00000237548 | 516    | 0.18    |
| SIGMAR1    | ENSG00000147955 | 515.5  | 217.825 |
| EDRF1      | ENSG00000107938 | 515.5  | 32.07   |
| MARCH8     | ENSG00000165406 | 515.5  | 13.735  |
| TMEFF2     | ENSG00000144339 | 515.5  | 0.99    |
| XCR1       | ENSG00000173578 | 515.5  | 0.09    |
| NCF1B      | ENSG00000182487 | 515.5  | 0       |
| CLPTM1     | ENSG00000104853 | 515    | 112.14  |
| PCMT1      | ENSG00000120265 | 515    | 109.64  |
| SDHD       | ENSG00000204370 | 515    | 50.81   |
| QSER1      | ENSG00000060749 | 515    | 49.14   |
| ZDBF2      | ENSG00000204186 | 515    | 7.94    |
| FRMD4B     | ENSG00000114541 | 515    | 4.335   |
| C2orf48    | ENSG00000163009 | 515    | 1.865   |
| BCO2       | ENSG00000197580 | 515    | 1.145   |
| IL18       | ENSG00000150782 | 515    | 0.27    |
| TEX12      | ENSG00000150783 | 515    | 0.085   |
| RBM43P1    | ENSG00000239263 | 515    | 0.06    |
| MRPS36P4   | ENSG00000255231 | 515    | 0       |
| RPL7P42    | ENSG00000241825 | 515    | 0       |
| DTNA       | ENSG00000134769 | 514.5  | 31.21   |
| MFSD8      | ENSG00000164073 | 514.5  | 10.1    |
| NKAIN1     | ENSG00000084628 | 514.5  | 3.22    |
| FAM26D     | ENSG00000164451 | 514.5  | 0       |
| LRRC52     | ENSG00000162763 | 514.5  | 0       |
| UBE2K      | ENSG00000078140 | 514    | 81.235  |
| ASF1B      | ENSG00000105011 | 514    | 59.84   |
| TPMT       | ENSG00000137364 | 514    | 10.505  |
| GPSM2      | ENSG00000121957 | 513.75 | 20.115  |
| DNAJC7     | ENSG00000168259 | 513.5  | 157.15  |
| C1orf159   | ENSG00000131591 | 513.5  | 23.255  |
| HCAR1      | ENSG00000196917 | 513.5  | 0.19    |
| HCAR2      | ENSG00000182782 | 513.5  | 0.045   |

|           |                 |       |        |
|-----------|-----------------|-------|--------|
| HCAR3     | ENSG00000255398 | 513.5 | 0.045  |
| PPP1R10   | ENSG00000204569 | 513   | 96.64  |
| DIS3      | ENSG00000083520 | 513   | 96.63  |
| DLC1      | ENSG00000164741 | 513   | 23.83  |
| PPARA     | ENSG00000186951 | 513   | 7.115  |
| BAI1      | ENSG00000181790 | 513   | 3.47   |
| FBXL13    | ENSG00000161040 | 513   | 0.74   |
| ABCD3     | ENSG00000117528 | 512.5 | 41.91  |
| PDP1      | ENSG00000164951 | 512.5 | 11.005 |
| ARID5B    | ENSG00000150347 | 512.5 | 9.345  |
| GRTP1     | ENSG00000139835 | 512.5 | 6.06   |
| LINC00537 | ENSG00000232815 | 512.5 | 2.36   |
| PNPLA6    | ENSG00000032444 | 512   | 30.33  |
| STEAP3    | ENSG00000115107 | 512   | 20.52  |
| MCOLN1    | ENSG00000090674 | 512   | 17.59  |
| CALCRL    | ENSG00000064989 | 512   | 0.53   |
| IL21R-AS1 | ENSG00000259954 | 512   | 0.095  |
| GAPDHP59  | ENSG00000231739 | 512   | 0      |
| TAF2      | ENSG00000064313 | 511.5 | 44.12  |
| SMARCA1   | ENSG00000138375 | 511.5 | 19.815 |
| SLC25A33  | ENSG00000171612 | 511.5 | 9.525  |
| EPB41L4B  | ENSG00000095203 | 511.5 | 4.45   |
| PHLPP1    | ENSG00000081913 | 511   | 13.04  |
| TBC1D30   | ENSG00000111490 | 511   | 4.005  |
| PART1     | ENSG00000152931 | 511   | 0.02   |
| PRRC2C    | ENSG00000117523 | 510.5 | 191.71 |
| KPNA4     | ENSG00000186432 | 510.5 | 77.495 |
| CCDC6     | ENSG00000108091 | 510.5 | 29.965 |
| MAGI3     | ENSG00000081026 | 510.5 | 18.38  |
| PPIL6     | ENSG00000185250 | 510.5 | 2.515  |
| ZMYND8    | ENSG00000101040 | 510   | 22.55  |
| SOBP      | ENSG00000112320 | 510   | 11.935 |
| CPEB4     | ENSG00000113742 | 510   | 9.675  |
| LRRC16A   | ENSG00000079691 | 510   | 6.16   |
| LDHC      | ENSG00000166796 | 510   | 3.9    |
| MOB3B     | ENSG00000120162 | 510   | 3.8    |
| SYTL4     | ENSG00000102362 | 510   | 2.93   |
| NOTCH4    | ENSG00000204301 | 510   | 0.565  |
| GPSM3     | ENSG00000213654 | 510   | 0.215  |
| RN7SKP197 | ENSG00000252886 | 510   | 0      |
| ZNF366    | ENSG00000178175 | 510   | 0      |
| ACP1      | ENSG00000143727 | 509.5 | 144.92 |
| RNF150    | ENSG00000170153 | 509.5 | 7.815  |
| FBN1      | ENSG00000166147 | 509.5 | 4.505  |
| CRX       | ENSG00000105392 | 509.5 | 0.115  |
| H2BFWT    | ENSG00000123569 | 509.5 | 0.07   |
| TPRX2P    | ENSG00000259009 | 509.5 | 0.065  |

|                 |                 |        |          |
|-----------------|-----------------|--------|----------|
| CYP2C19         | ENSG00000165841 | 509.5  | 0.05     |
| CYP2C18         | ENSG00000108242 | 509.5  | 0        |
| PAX6            | ENSG00000007372 | 509    | 42.335   |
| ZC3HAV1         | ENSG00000105939 | 509    | 38.01    |
| PRKCZ           | ENSG00000067606 | 509    | 20.045   |
| WDR37           | ENSG00000047056 | 509    | 8.07     |
| EMR4P           | ENSG00000268758 | 509    | 0        |
| ATP1A3          | ENSG00000105409 | 508.5  | 10.29    |
| FAM20C          | ENSG00000177706 | 508.5  | 6.14     |
| SH2D4B          | ENSG00000178217 | 508.5  | 0.02     |
| CD96            | ENSG00000153283 | 508.5  | 0        |
| SPECC1L         | ENSG00000100014 | 508    | 56.705   |
| GPATCH8         | ENSG00000186566 | 508    | 39.415   |
| TUBBP5          | ENSG00000159247 | 508    | 9.805    |
| EML5            | ENSG00000165521 | 508    | 8.97     |
| ADORA2A         | ENSG00000128271 | 508    | 3.71     |
| SPECC1L-ADORA2A | ENSG00000258555 | 508    | 1.835    |
| RMST            | ENSG00000255794 | 508    | 0        |
| RBMS1           | ENSG00000153250 | 507.75 | 25.57    |
| PPP1CC          | ENSG00000186298 | 507.5  | 219.125  |
| WDR83OS         | ENSG00000105583 | 507.5  | 88.085   |
| MAN2B1          | ENSG00000104774 | 507.5  | 35.72    |
| STAG1           | ENSG00000118007 | 507.5  | 25.015   |
| KCTD7           | ENSG00000243335 | 507.5  | 19.095   |
| RABGEF1         | ENSG00000154710 | 507.5  | 8.745    |
| PAH             | ENSG00000171759 | 507.5  | 0.015    |
| GRIN2B          | ENSG00000273079 | 507.5  | 0        |
| RPS17L          | ENSG00000182774 | 507    | 1635.125 |
| TYK2            | ENSG00000105397 | 507    | 67.465   |
| CCNG2           | ENSG00000138764 | 507    | 16.55    |
| TMEM161B        | ENSG00000164180 | 507    | 14.455   |
| VWA8            | ENSG00000102763 | 507    | 10.805   |
| PHLDB2          | ENSG00000144824 | 507    | 5.46     |
| CPEB1           | ENSG00000214575 | 507    | 2.87     |
| PLCXD2          | ENSG00000240891 | 507    | 2.27     |
| COL6A4P2        | ENSG00000228252 | 507    | 0.47     |
| COL22A1         | ENSG00000169436 | 507    | 0.115    |
| OTUD7B          | ENSG00000163113 | 506.5  | 16.255   |
| CCDC180         | ENSG00000197816 | 506.5  | 5.15     |
| CCDC60          | ENSG00000183273 | 506.5  | 0        |
| DENND4B         | ENSG00000198837 | 506    | 39.095   |
| YEATS4          | ENSG00000127337 | 506    | 35.63    |
| NIPBL           | ENSG00000164190 | 506    | 32.195   |
| GPR107          | ENSG00000148358 | 506    | 19.145   |
| KIN             | ENSG00000151657 | 506    | 15.92    |
| KLC3            | ENSG00000104892 | 506    | 12.25    |
| C1orf95         | ENSG00000203685 | 506    | 1.245    |

|            |                 |       |        |
|------------|-----------------|-------|--------|
| KRT18P31   | ENSG00000249850 | 506   | 0.535  |
| TMIGD2     | ENSG00000167664 | 506   | 0.05   |
| CNTN3      | ENSG00000113805 | 506   | 0      |
| KLHL1      | ENSG00000150361 | 506   | 0      |
| PSMC1P13   | ENSG00000232314 | 506   | 0      |
| PHF20      | ENSG00000025293 | 505.5 | 23.17  |
| ZNF143     | ENSG00000166478 | 505.5 | 20.42  |
| PCDH10     | ENSG00000138650 | 505.5 | 16.565 |
| CNRIP1     | ENSG00000119865 | 505.5 | 8.73   |
| THSD1      | ENSG00000136114 | 505.5 | 1.125  |
| KIAA2022   | ENSG00000050030 | 505.5 | 0.265  |
| UPB1       | ENSG00000100024 | 505.5 | 0.15   |
| COL28A1    | ENSG00000215018 | 505.5 | 0.035  |
| DDX50      | ENSG00000107625 | 505   | 38.315 |
| ASPN       | ENSG00000106819 | 505   | 0.525  |
| RFPL4B     | ENSG00000251258 | 505   | 0      |
| TBL1X      | ENSG00000101849 | 504.5 | 31.85  |
| PACS2      | ENSG00000179364 | 504.5 | 23.185 |
| BRF1       | ENSG00000185024 | 504.5 | 21.805 |
| ANGPT1     | ENSG00000154188 | 504.5 | 0.2    |
| CADPS      | ENSG00000163618 | 504.5 | 0.16   |
| EYA3       | ENSG00000158161 | 504   | 46.88  |
| CCDC150    | ENSG00000144395 | 504   | 34.66  |
| OSBPL8     | ENSG00000091039 | 504   | 29.945 |
| TRMT2B     | ENSG00000188917 | 504   | 16.825 |
| MBTD1      | ENSG00000011258 | 504   | 12.67  |
| FHL2       | ENSG00000115641 | 504   | 9.955  |
| FRMPD1     | ENSG00000070601 | 504   | 0.72   |
| LRRK1      | ENSG00000154237 | 504   | 0.67   |
| C17orf105  | ENSG00000231256 | 504   | 0.05   |
| FAM153C    | ENSG00000204677 | 504   | 0      |
| TRMT2B-AS1 | ENSG00000225839 | 504   | 0      |
| WSCD2      | ENSG00000075035 | 504   | 0      |
| C12orf75   | ENSG00000235162 | 503.5 | 71.96  |
| ATF6       | ENSG00000118217 | 503.5 | 18.02  |
| ITFG1      | ENSG00000129636 | 503.5 | 16.365 |
| ZBTB5      | ENSG00000168795 | 503.5 | 10.59  |
| ZNF708     | ENSG00000182141 | 503.5 | 8.945  |
| RNA5SP424  | ENSG00000212290 | 503.5 | 0.515  |
| SHROOM4    | ENSG00000158352 | 503.5 | 0.195  |
| LINC00393  | ENSG00000224853 | 503.5 | 0      |
| OR4K6P     | ENSG00000228304 | 503.5 | 0      |
| IGF2BP3    | ENSG00000136231 | 503   | 49.22  |
| C12orf76   | ENSG00000174456 | 503   | 5.45   |
| EPB41L2    | ENSG00000079819 | 502.5 | 107.19 |
| SLC25A26   | ENSG00000144741 | 502.5 | 16.16  |
| L2HGDH     | ENSG00000087299 | 502.5 | 14.52  |

|             |                 |       |         |
|-------------|-----------------|-------|---------|
| NT5M        | ENSG00000205309 | 502.5 | 2.46    |
| PROX1-AS1   | ENSG00000230461 | 502.5 | 0.44    |
| RPL26P3     | ENSG00000240179 | 502.5 | 0.295   |
| SLCO2B1     | ENSG00000137491 | 502.5 | 0.19    |
| OR2AT1P     | ENSG00000254475 | 502.5 | 0       |
| COL25A1     | ENSG00000188517 | 502   | 10.025  |
| GCNT2       | ENSG00000111846 | 502   | 2.755   |
| PPP1CA      | ENSG00000172531 | 501.5 | 134.965 |
| HACL1       | ENSG00000131373 | 501.5 | 21.775  |
| ETS1        | ENSG00000134954 | 501.5 | 1.59    |
| TBC1D10C    | ENSG00000175463 | 501.5 | 0.715   |
| RNF144A-AS1 | ENSG00000228203 | 501.5 | 0.535   |
| VWC2        | ENSG00000188730 | 501.5 | 0.01    |
| MTF2        | ENSG00000143033 | 501   | 68.18   |
| ARHGAP21    | ENSG00000107863 | 501   | 27.775  |
| RBMS3       | ENSG00000144642 | 501   | 2.49    |
| MAP2        | ENSG00000078018 | 501   | 0.73    |
| GRIA4       | ENSG00000152578 | 501   | 0.16    |
| CFI         | ENSG00000205403 | 501   | 0.155   |
| OR5D17P     | ENSG00000181837 | 501   | 0       |
| CDR2        | ENSG00000140743 | 500.5 | 27.285  |
| STPG1       | ENSG00000001460 | 500.5 | 9.015   |
| FAM110B     | ENSG00000169122 | 500.5 | 6.33    |
| RRN3P3      | ENSG00000257122 | 500.5 | 3.415   |
| CCL22       | ENSG00000102962 | 500.5 | 0.06    |
| BIN2        | ENSG00000110934 | 500.5 | 0.03    |
| LINC00578   | ENSG00000228221 | 500.5 | 0       |
| RPIA        | ENSG00000153574 | 500   | 20.86   |
| FRG1B       | ENSG00000149531 | 500   | 16.405  |
| BTN3A2      | ENSG00000186470 | 500   | 7.685   |
| NEBL        | ENSG00000078114 | 500   | 5.95    |
| KIFC3       | ENSG00000140859 | 500   | 3.75    |
| C10orf113   | ENSG00000204683 | 500   | 0.115   |
| TAGLN3      | ENSG00000144834 | 500   | 0.07    |
| DDX60L      | ENSG00000181381 | 500   | 0.035   |
| FBXO31      | ENSG00000103264 | 499.5 | 24.495  |
| C16orf95    | ENSG00000260456 | 499.5 | 3.51    |
| ATG3        | ENSG00000144848 | 499   | 89.83   |
| NCOR2       | ENSG00000196498 | 499   | 60.88   |
| CDK5RAP1    | ENSG00000101391 | 499   | 34.19   |
| CNTN1       | ENSG00000018236 | 499   | 8.42    |
| ANKRD44     | ENSG00000065413 | 499   | 5.55    |
| ADHFE1      | ENSG00000147576 | 499   | 2.705   |
| PRKCQ       | ENSG00000065675 | 499   | 2.66    |
| C8orf46     | ENSG00000169085 | 499   | 0.81    |
| ANKRD44-IT1 | ENSG00000236977 | 499   | 0.415   |
| MDN1        | ENSG00000112159 | 498.5 | 35.63   |

|            |                 |        |         |
|------------|-----------------|--------|---------|
| LGI2       | ENSG00000153012 | 498.5  | 1.3     |
| DPY19L2P2  | ENSG00000170629 | 498.5  | 0.54    |
| NPHP3-AS1  | ENSG00000248724 | 498.5  | 0.12    |
| HDAC2      | ENSG00000196591 | 498    | 230.72  |
| DIAPH1     | ENSG00000131504 | 498    | 68.685  |
| IMPACT     | ENSG00000154059 | 498    | 25.995  |
| SIL1       | ENSG00000120725 | 498    | 22.9    |
| BRAF       | ENSG00000157764 | 498    | 22      |
| DFNB31     | ENSG00000095397 | 498    | 11.03   |
| CSRNP1     | ENSG00000144655 | 498    | 3.135   |
| LINC00351  | ENSG00000226317 | 498    | 1.195   |
| HTR2C      | ENSG00000147246 | 498    | 0.095   |
| MYOM3      | ENSG00000142661 | 498    | 0.025   |
| MIR1912    | ENSG00000222321 | 498    | 0       |
| TNS4       | ENSG00000131746 | 498    | 0       |
| IQCK       | ENSG00000174628 | 497.75 | 5.45    |
| SRCAP      | ENSG00000080603 | 497.5  | 123.405 |
| FKBP3      | ENSG00000100442 | 497.5  | 108.445 |
| PHKG2      | ENSG00000156873 | 497.5  | 64.49   |
| ATP8A1     | ENSG00000124406 | 497.5  | 4.365   |
| LPHN2      | ENSG00000117114 | 497    | 39.205  |
| POU3F3     | ENSG00000198914 | 497    | 6.855   |
| EVA1C      | ENSG00000166979 | 497    | 2.705   |
| CAPN6      | ENSG00000077274 | 497    | 0.105   |
| ST13P20    | ENSG00000215875 | 497    | 0.06    |
| HNRNPA3P14 | ENSG00000224494 | 497    | 0       |
| SPINT2     | ENSG00000167642 | 496.5  | 37.625  |
| PPP1R14A   | ENSG00000167641 | 496.5  | 21.07   |
| ZMYM1      | ENSG00000197056 | 496.5  | 20.42   |
| NOTO       | ENSG00000214513 | 496.5  | 0.07    |
| TNR        | ENSG00000116147 | 496.5  | 0.03    |
| TNR-IT1    | ENSG00000235628 | 496.5  | 0       |
| UBE2E2     | ENSG00000182247 | 496    | 26.615  |
| MBNL3      | ENSG00000076770 | 496    | 14      |
| ZKSCAN5    | ENSG00000196652 | 496    | 12.72   |
| WSCD1      | ENSG00000179314 | 496    | 8.285   |
| SRRM3      | ENSG00000177679 | 496    | 2.1     |
| TMEM163    | ENSG00000152128 | 496    | 1.065   |
| HIGD2A     | ENSG00000146066 | 495.75 | 141.21  |
| CLTB       | ENSG00000175416 | 495.75 | 55.825  |
| ARL10      | ENSG00000175414 | 495.75 | 14.54   |
| UQCR10     | ENSG00000184076 | 495.5  | 190.53  |
| UQCRC2     | ENSG00000140740 | 495.5  | 174.435 |
| ELF2       | ENSG00000109381 | 495    | 31.75   |
| PHIP       | ENSG00000146247 | 495    | 27.65   |
| C18orf25   | ENSG00000152242 | 495    | 15.2    |
| MOXD1      | ENSG00000079931 | 495    | 12.155  |

|          |                 |       |         |
|----------|-----------------|-------|---------|
| IRAK1BP1 | ENSG00000146243 | 495   | 5.74    |
| CD300A   | ENSG00000167851 | 495   | 0       |
| SKP1     | ENSG00000113558 | 494   | 150.07  |
| PPP2CA   | ENSG00000113575 | 494   | 116.545 |
| EMC3     | ENSG00000125037 | 494   | 75.845  |
| SLC26A2  | ENSG00000155850 | 494   | 7.7     |
| CDKL3    | ENSG00000006837 | 494   | 2.31    |
| GPR114   | ENSG00000159618 | 494   | 0       |
| RPL23    | ENSG00000125691 | 493.5 | 952.875 |
| MRPS16   | ENSG00000182180 | 493.5 | 70.76   |
| DNAJC9   | ENSG00000213551 | 493.5 | 40.95   |
| FAM149B1 | ENSG00000138286 | 493.5 | 19.11   |
| SH3BP4   | ENSG00000130147 | 493.5 | 11.24   |
| PPP4R1L  | ENSG00000124224 | 493.5 | 5.06    |
| ARHGEF6  | ENSG00000129675 | 493.5 | 5.03    |
| MAOA     | ENSG00000189221 | 493.5 | 2.115   |
| EIF4A2P2 | ENSG00000227382 | 493.5 | 0.89    |
| ANGPT4   | ENSG00000101280 | 493.5 | 0       |
| RFC5     | ENSG00000111445 | 493   | 93.585  |
| EFTUD1   | ENSG00000140598 | 492.5 | 27.71   |
| DUXAP10  | ENSG00000257227 | 492.5 | 24.605  |
| CAMSAP3  | ENSG00000076826 | 492.5 | 14.195  |
| ATXN1    | ENSG00000124788 | 492.5 | 10.65   |
| DCDC1    | ENSG00000170959 | 492.5 | 0.36    |
| SP100    | ENSG00000067066 | 492.5 | 0.225   |
| ZNF347   | ENSG00000197937 | 492.5 | 0.135   |
| ACAN     | ENSG00000157766 | 492.5 | 0.13    |
| HMGB1P3  | ENSG00000250011 | 492.5 | 0.105   |
| ZNF415   | ENSG00000170954 | 492.5 | 0       |
| HEATR2   | ENSG00000164818 | 492   | 60.095  |
| REV3L    | ENSG00000009413 | 492   | 18.005  |
| VTI1A    | ENSG00000151532 | 492   | 15.735  |
| MIR4295  | ENSG00000264763 | 492   | 1.665   |
| OPN1LW   | ENSG00000102076 | 492   | 0       |
| CHCHD3   | ENSG00000106554 | 491.5 | 104.76  |
| ANXA2    | ENSG00000182718 | 491.5 | 57.58   |
| MIPOL1   | ENSG00000151338 | 491.5 | 8.39    |
| FAT2     | ENSG00000086570 | 491.5 | 0.23    |
| SNTG1    | ENSG00000147481 | 491.5 | 0.135   |
| TRIM29   | ENSG00000137699 | 491.5 | 0       |
| PARN     | ENSG00000140694 | 491   | 37.405  |
| KCND2    | ENSG00000184408 | 491   | 0       |
| ATP6V0A1 | ENSG00000033627 | 490.5 | 65.065  |
| PRMT7    | ENSG00000132600 | 490.5 | 49.02   |
| PIGU     | ENSG00000101464 | 490.5 | 25.535  |
| RAB27B   | ENSG00000041353 | 490.5 | 0.135   |
| MIR5010  | ENSG00000265611 | 490.5 | 0       |

|                |                 |       |         |
|----------------|-----------------|-------|---------|
| RPSAP57        | ENSG00000267524 | 490.5 | 0       |
| ATP5O          | ENSG00000241837 | 490   | 207.61  |
| NUP214         | ENSG00000126883 | 490   | 50.28   |
| DONSON         | ENSG00000159147 | 490   | 46.55   |
| ITSN1          | ENSG00000205726 | 490   | 36.555  |
| CRYZL1         | ENSG00000205758 | 490   | 30.545  |
| SPATA13        | ENSG00000182957 | 490   | 6.005   |
| CR2            | ENSG00000117322 | 490   | 0.98    |
| FCRL2          | ENSG00000132704 | 490   | 0.055   |
| C1QTNF9        | ENSG00000240654 | 490   | 0.04    |
| C18orf56       | ENSG00000176912 | 489.5 | 1.8     |
| PITPNM3        | ENSG00000091622 | 489.5 | 1.305   |
| CLUL1          | ENSG00000079101 | 489.5 | 1.245   |
| FARSB          | ENSG00000116120 | 489   | 79.34   |
| WIPI2          | ENSG00000157954 | 489   | 56.535  |
| SRGAP2         | ENSG00000163486 | 489   | 41.385  |
| MSANTD3        | ENSG00000066697 | 489   | 26.39   |
| TMEFF1         | ENSG00000241697 | 489   | 7.705   |
| MSANTD3-TMEFF1 | ENSG00000251349 | 489   | 0       |
| RBM42          | ENSG00000126254 | 488.5 | 81.89   |
| SQLE           | ENSG00000104549 | 488.5 | 68.205  |
| NUMB           | ENSG00000133961 | 488.5 | 35.55   |
| PTPLB          | ENSG00000206527 | 488.5 | 29.6    |
| MADD           | ENSG00000110514 | 488.5 | 26.07   |
| SLC18B1        | ENSG00000146409 | 488.5 | 24.09   |
| ALG2           | ENSG00000119523 | 488.5 | 18.71   |
| SYK            | ENSG00000165025 | 488.5 | 6.695   |
| ADCY1          | ENSG00000164742 | 488.5 | 5.13    |
| FMO11P         | ENSG00000232148 | 488.5 | 0       |
| RBM39          | ENSG00000131051 | 488   | 315.32  |
| CNOT1          | ENSG00000125107 | 488   | 255.465 |
| WWTR1          | ENSG00000018408 | 488   | 16.045  |
| WWTR1-IT1      | ENSG00000241985 | 488   | 0.3     |
| LINC00587      | ENSG00000204250 | 488   | 0       |
| MOGAT2         | ENSG00000166391 | 488   | 0       |
| CD59           | ENSG00000085063 | 487.5 | 48.84   |
| ARHGAP19       | ENSG00000213390 | 487.5 | 15.675  |
| ARHGAP19-SLIT1 | ENSG00000269891 | 487.5 | 7.485   |
| GTF2H5         | ENSG00000272047 | 487.5 | 4.825   |
| CYP39A1        | ENSG00000146233 | 487.5 | 2.58    |
| SLIT1          | ENSG00000187122 | 487.5 | 0.725   |
| GRIK2          | ENSG00000164418 | 487.5 | 0.71    |
| C11orf91       | ENSG00000205177 | 487.5 | 0.495   |
| KBTBD12        | ENSG00000187715 | 487.5 | 0.045   |
| SCN1A          | ENSG00000144285 | 487.5 | 0.01    |
| EIF4A1P9       | ENSG00000262953 | 487.5 | 0       |
| RNA5SP139      | ENSG00000201210 | 487.5 | 0       |

|            |                 |       |        |
|------------|-----------------|-------|--------|
| RNF219     | ENSG00000152193 | 487   | 29.8   |
| NFXL1      | ENSG00000170448 | 487   | 13.845 |
| ASB1       | ENSG00000065802 | 487   | 12.22  |
| FRMD5      | ENSG00000171877 | 487   | 3.43   |
| PIN4P1     | ENSG00000227973 | 487   | 2.18   |
| ACTBP7     | ENSG00000185607 | 487   | 0.34   |
| CIT        | ENSG00000122966 | 486.5 | 26.135 |
| GPATCH2L   | ENSG00000089916 | 486.5 | 18.13  |
| MARC2      | ENSG00000117791 | 486.5 | 18.075 |
| UBAP2L     | ENSG00000143569 | 486   | 257.71 |
| RAB2A      | ENSG00000104388 | 486   | 88.055 |
| ZBTB38     | ENSG00000177311 | 486   | 12.405 |
| RADIL      | ENSG00000157927 | 486   | 8.715  |
| SEC31B     | ENSG00000075826 | 486   | 7.535  |
| SLC44A5    | ENSG00000137968 | 486   | 4.32   |
| MYO15B     | ENSG00000266714 | 486   | 4.21   |
| MYRIP      | ENSG00000170011 | 486   | 0.35   |
| NDUFB8     | ENSG00000255339 | 486   | 0.3    |
| PAPOLB     | ENSG00000218823 | 486   | 0.26   |
| BRCA2      | ENSG00000139618 | 485.5 | 23.27  |
| RAP1GAP2   | ENSG00000132359 | 485.5 | 17.85  |
| HRK        | ENSG00000135116 | 485.5 | 2.985  |
| SERTM1     | ENSG00000180440 | 485.5 | 0.995  |
| IFIT1P1    | ENSG00000215515 | 485.5 | 0.69   |
| HNRNPA3P12 | ENSG00000219102 | 485.5 | 0.195  |
| YBX1       | ENSG00000065978 | 485   | 957.19 |
| DVL2       | ENSG00000004975 | 485   | 41.99  |
| ATF7       | ENSG00000170653 | 485   | 20.73  |
| MTRF1      | ENSG00000120662 | 485   | 10.95  |
| COMMD10    | ENSG00000145781 | 485   | 7.745  |
| NEB        | ENSG00000183091 | 485   | 2.955  |
| FHAD1      | ENSG00000142621 | 485   | 2.705  |
| ALDH8A1    | ENSG00000118514 | 485   | 1.135  |
| DNAH3      | ENSG00000158486 | 485   | 0.335  |
| CACNG3     | ENSG00000006116 | 485   | 0      |
| MORC1      | ENSG00000114487 | 485   | 0      |
| ANKRD13A   | ENSG00000076513 | 484.5 | 32.94  |
| KIAA0319L  | ENSG00000142687 | 484.5 | 32.805 |
| TAF1       | ENSG00000147133 | 484.5 | 24.385 |
| GRIP1      | ENSG00000155974 | 484.5 | 7.365  |
| PTPRJ      | ENSG00000149177 | 484.5 | 3.7    |
| SLC10A1    | ENSG00000100652 | 484.5 | 0.335  |
| PPME1      | ENSG00000214517 | 484   | 49.045 |
| CCDC138    | ENSG00000163006 | 484   | 41.735 |
| SH3BGRL    | ENSG00000131171 | 484   | 33.21  |
| EIF4E3     | ENSG00000163412 | 484   | 8.855  |
| GPRIN3     | ENSG00000185477 | 484   | 4.075  |

|           |                 |       |         |
|-----------|-----------------|-------|---------|
| TICAM1    | ENSG00000127666 | 484   | 2.595   |
| ATP2B3    | ENSG00000067842 | 484   | 0.405   |
| TANK      | ENSG00000136560 | 483.5 | 26.46   |
| RNF38     | ENSG00000137075 | 483.5 | 26.315  |
| FOCAD     | ENSG00000188352 | 483.5 | 25.345  |
| THAP3     | ENSG00000041988 | 483.5 | 17.69   |
| MKL2      | ENSG00000186260 | 483.5 | 16.215  |
| ERGIC1    | ENSG00000113719 | 483   | 67.795  |
| OSBP2     | ENSG00000184792 | 483   | 5.49    |
| GPM6A     | ENSG00000150625 | 483   | 5.145   |
| PFKFB4    | ENSG00000114268 | 483   | 4.16    |
| RIMKLA    | ENSG00000177181 | 483   | 2.37    |
| EIF4HP2   | ENSG00000237977 | 483   | 1.445   |
| UCN2      | ENSG00000145040 | 483   | 0.515   |
| ITGAE     | ENSG00000083457 | 482.5 | 32.25   |
| GALNT7    | ENSG00000109586 | 482.5 | 15.725  |
| SNAPC3    | ENSG00000164975 | 482.5 | 14.97   |
| NSUN6     | ENSG00000241058 | 482.5 | 12.555  |
| ARL5B-AS1 | ENSG00000152487 | 482.5 | 0.625   |
| MYO1A     | ENSG00000166866 | 482.5 | 0.265   |
| TAC3      | ENSG00000166863 | 482.5 | 0.115   |
| MIR548T   | ENSG00000221296 | 482.5 | 0       |
| PLEKHB2   | ENSG00000115762 | 482   | 35.17   |
| ST5       | ENSG00000166444 | 482   | 17.805  |
| SLC13A3   | ENSG00000158296 | 482   | 5.74    |
| SLC2A12   | ENSG00000146411 | 482   | 1.685   |
| A3GALT2   | ENSG00000184389 | 482   | 0.125   |
| CYP4F31P  | ENSG00000178206 | 482   | 0       |
| FAR2P4    | ENSG00000231431 | 482   | 0       |
| POTEE     | ENSG00000188219 | 482   | 0       |
| MAX       | ENSG00000125952 | 481.5 | 87.605  |
| HSF1      | ENSG00000185122 | 481.5 | 81.515  |
| CADM1     | ENSG00000182985 | 481.5 | 40.9    |
| SAP130    | ENSG00000136715 | 481.5 | 40.44   |
| FAM21A    | ENSG00000099290 | 481.5 | 31.47   |
| DRD5P1    | ENSG00000184303 | 481.5 | 0.07    |
| MTRNR2L2  | ENSG00000271043 | 481   | 7534.3  |
| DHFR      | ENSG00000228716 | 481   | 175.12  |
| CNIH4     | ENSG00000143771 | 481   | 80.29   |
| POP1      | ENSG00000104356 | 481   | 28.345  |
| EZH1      | ENSG00000108799 | 481   | 15.67   |
| WBP1L     | ENSG00000166272 | 481   | 10.99   |
| MIR663B   | ENSG00000221288 | 480.5 | 614.805 |
| ETF1      | ENSG00000120705 | 480.5 | 113.19  |
| SRPK2     | ENSG00000135250 | 480.5 | 35.835  |
| NRF1      | ENSG00000106459 | 480.5 | 17.98   |
| RNGTT     | ENSG00000111880 | 480.5 | 16.685  |

|           |                 |        |        |
|-----------|-----------------|--------|--------|
| INPP5A    | ENSG00000068383 | 480.5  | 15.725 |
| PAAF1     | ENSG00000175575 | 480.5  | 12.705 |
| ANKRD30BL | ENSG00000163046 | 480.5  | 1.26   |
| ASNSP1    | ENSG00000248498 | 480.5  | 0.67   |
| RNA5-8SP5 | ENSG00000202174 | 480.5  | 0      |
| ANKRD13C  | ENSG00000118454 | 480    | 31.975 |
| PLEKHM1   | ENSG00000225190 | 480    | 14.655 |
| SASH1     | ENSG00000111961 | 480    | 5.445  |
| CYP51A1P3 | ENSG00000215223 | 480    | 0.085  |
| ATP10B    | ENSG00000118322 | 480    | 0.06   |
| CEACAM7   | ENSG00000007306 | 480    | 0      |
| C9orf156  | ENSG00000136932 | 479.5  | 17.355 |
| HGSNAT    | ENSG00000165102 | 479.5  | 12.905 |
| KIAA1467  | ENSG00000084444 | 479.5  | 11.405 |
| DENND2C   | ENSG00000175984 | 479.5  | 5.55   |
| GSG1      | ENSG00000111305 | 479.5  | 0.495  |
| CCDC129   | ENSG00000180347 | 479.5  | 0.04   |
| ASAP1     | ENSG00000153317 | 479    | 38.955 |
| NCOA2     | ENSG00000140396 | 479    | 19.985 |
| CEPT1     | ENSG00000134255 | 478.5  | 38.82  |
| RALGAPA1  | ENSG00000174373 | 478.5  | 22.705 |
| CPSF1P1   | ENSG00000214076 | 478.5  | 3.445  |
| ADAMTS7   | ENSG00000136378 | 478.5  | 2.015  |
| SLC5A4    | ENSG00000100191 | 478.5  | 0.92   |
| LINC00383 | ENSG00000237534 | 478.5  | 0      |
| WDR18     | ENSG00000065268 | 478    | 57.53  |
| MCM8      | ENSG00000125885 | 478    | 30.625 |
| SULT2B1   | ENSG00000088002 | 478    | 0.495  |
| GBP5      | ENSG00000154451 | 478    | 0.06   |
| GATS      | ENSG00000239521 | 477.75 | 9.61   |
| QRICH1    | ENSG00000198218 | 477.5  | 98.495 |
| GEMIN6    | ENSG00000152147 | 477.5  | 35.105 |
| BMS1      | ENSG00000165733 | 477.5  | 33.57  |
| EEFSEC    | ENSG00000132394 | 477.5  | 18.235 |
| FCHO1     | ENSG00000130475 | 477.5  | 7.58   |
| BMP1      | ENSG00000168487 | 477.5  | 5.765  |
| VAV3      | ENSG00000134215 | 477.5  | 2.675  |
| ZP3       | ENSG00000188372 | 477.5  | 1.665  |
| CGNL1     | ENSG00000128849 | 477.5  | 1.645  |
| SRCRB4D   | ENSG00000146700 | 477.5  | 0.72   |
| CHD6      | ENSG00000124177 | 477    | 22.325 |
| KCNQ3     | ENSG00000184156 | 477    | 0.005  |
| DLGAP2    | ENSG00000198010 | 477    | 0      |
| MLPH      | ENSG00000115648 | 477    | 0      |
| RNF2      | ENSG00000121481 | 476.5  | 54     |
| EPB41L1   | ENSG00000088367 | 476.5  | 26.255 |
| MTFR2     | ENSG00000146410 | 476.5  | 18.625 |

|              |                 |        |        |
|--------------|-----------------|--------|--------|
| CIB2         | ENSG00000136425 | 476.5  | 17.28  |
| ZNF554       | ENSG00000172006 | 476.5  | 2.285  |
| PSMD5-AS1    | ENSG00000226752 | 476.5  | 0.305  |
| DNAJC9-AS1   | ENSG00000236756 | 476.5  | 0.215  |
| RAB37        | ENSG00000172794 | 476.5  | 0.075  |
| RPL3P3       | ENSG00000243388 | 476.5  | 0.05   |
| DEC1         | ENSG00000173077 | 476.5  | 0.025  |
| OTX2-AS1     | ENSG00000248550 | 476.5  | 0      |
| MOB3A        | ENSG00000172081 | 476    | 11.71  |
| KAL1         | ENSG00000011201 | 476    | 0      |
| SNORD114-13  | ENSG00000201247 | 476    | 0      |
| SNORD114-15  | ENSG00000201557 | 476    | 0      |
| SNORD114-16  | ENSG00000199914 | 476    | 0      |
| SNORD114-20  | ENSG00000202048 | 476    | 0      |
| SNORD114-21  | ENSG00000272344 | 476    | 0      |
| SNORD114-25  | ENSG00000200612 | 476    | 0      |
| CAV2         | ENSG00000105971 | 475.75 | 8.44   |
| SKA2         | ENSG00000182628 | 475.5  | 78.3   |
| UGGT1        | ENSG00000136731 | 475.5  | 41.915 |
| GNA12        | ENSG00000146535 | 475.5  | 21.965 |
| NBPF3        | ENSG00000142794 | 475.5  | 14.19  |
| C5orf66      | ENSG00000224186 | 475.5  | 6.905  |
| SH2D3A       | ENSG00000125731 | 475.5  | 3.13   |
| SYNM         | ENSG00000182253 | 475.5  | 2.65   |
| ZC2HC1C      | ENSG00000119703 | 475.5  | 2.285  |
| C15orf26     | ENSG00000156206 | 475.5  | 0      |
| ZMAT4        | ENSG00000165061 | 475.5  | 0      |
| EPS15        | ENSG00000085832 | 475    | 33.965 |
| MYEF2        | ENSG00000104177 | 475    | 24.865 |
| COL4A5       | ENSG00000188153 | 475    | 15.285 |
| AKTIP        | ENSG00000166971 | 475    | 12.55  |
| POC1B        | ENSG00000139323 | 475    | 10.44  |
| POC1B-GALNT4 | ENSG00000259075 | 475    | 2.48   |
| GALNT4       | ENSG00000257594 | 475    | 1.83   |
| TBP          | ENSG00000112592 | 474.5  | 30.97  |
| INPP5F       | ENSG00000198825 | 474.5  | 5.2    |
| CA12         | ENSG00000074410 | 474.5  | 3.115  |
| NUAK2        | ENSG00000163545 | 474.5  | 0.525  |
| LEMD1        | ENSG00000186007 | 474.5  | 0      |
| TMPRSS3      | ENSG00000160183 | 474.5  | 0      |
| RPL7AP33     | ENSG00000254200 | 474    | 0.225  |
| AXL          | ENSG00000167601 | 474    | 0.15   |
| ORC4         | ENSG00000115947 | 473.5  | 45.645 |
| TRIM37       | ENSG00000108395 | 473.5  | 33.92  |
| TNFSF9       | ENSG00000125657 | 473.5  | 4.77   |
| AGBL3        | ENSG00000146856 | 473.5  | 3.37   |
| REPS2        | ENSG00000169891 | 473.5  | 1.18   |

|            |                 |       |         |
|------------|-----------------|-------|---------|
| WIF1       | ENSG00000156076 | 473.5 | 0.32    |
| LINC00970  | ENSG00000203601 | 473.5 | 0.055   |
| C12orf42   | ENSG00000179088 | 473.5 | 0       |
| CENPK      | ENSG00000123219 | 473   | 45.39   |
| MECR       | ENSG00000116353 | 473   | 42.815  |
| DENND4C    | ENSG00000137145 | 473   | 20.135  |
| TRAPPC13   | ENSG00000113597 | 473   | 17.845  |
| MET        | ENSG00000105976 | 473   | 17.24   |
| SESTD1     | ENSG00000187231 | 473   | 17.14   |
| TBC1D10A   | ENSG00000099992 | 473   | 7.62    |
| GATSL3     | ENSG00000239282 | 473   | 3.21    |
| CD109      | ENSG00000156535 | 473   | 1.925   |
| MYL10      | ENSG00000106436 | 473   | 0       |
| MICAL3     | ENSG00000243156 | 472.5 | 33.97   |
| ZNF461     | ENSG00000197808 | 472.5 | 4.06    |
| ZNF337-AS1 | ENSG00000213742 | 472.5 | 3.05    |
| FMNL1      | ENSG00000184922 | 472.5 | 2.54    |
| ARSE       | ENSG00000157399 | 472.5 | 0.44    |
| FSD2       | ENSG00000186628 | 472.5 | 0.315   |
| UCHL5      | ENSG00000116750 | 472   | 134.735 |
| TIMELESS   | ENSG00000111602 | 472   | 56.64   |
| MRPL1      | ENSG00000169288 | 472   | 50.165  |
| SNX1       | ENSG00000028528 | 472   | 43.165  |
| CAMK2D     | ENSG00000145349 | 472   | 16.2    |
| VSIG10     | ENSG00000176834 | 472   | 12.58   |
| PHF21B     | ENSG00000056487 | 472   | 5.42    |
| NBEA       | ENSG00000172915 | 472   | 4.495   |
| PHBP13     | ENSG00000234835 | 472   | 1.105   |
| RAD9B      | ENSG00000151164 | 472   | 0.92    |
| OR9A1P     | ENSG00000237621 | 472   | 0.205   |
| CCDC155    | ENSG00000161609 | 472   | 0.03    |
| KCNJ6      | ENSG00000157542 | 472   | 0.005   |
| CCR3       | ENSG00000183625 | 472   | 0       |
| TRA2B      | ENSG00000136527 | 471.5 | 249.795 |
| GOLIM4     | ENSG00000173905 | 471.5 | 60.075  |
| PFKP       | ENSG00000067057 | 471.5 | 50.54   |
| SETD3      | ENSG00000183576 | 471.5 | 38.28   |
| LYRM2      | ENSG00000083099 | 471.5 | 32.58   |
| BRD9       | ENSG00000028310 | 471.5 | 26.865  |
| ZDHHC11    | ENSG00000188818 | 471.5 | 10.62   |
| ANKRD6     | ENSG00000135299 | 471.5 | 9.965   |
| MALT1      | ENSG00000172175 | 471.5 | 7.01    |
| TRIM69     | ENSG00000185880 | 471.5 | 5.045   |
| ZDHHC11B   | ENSG00000206077 | 471.5 | 4.01    |
| SERPINE3   | ENSG00000253309 | 471.5 | 1.52    |
| IFI44L     | ENSG00000137959 | 471.5 | 0.355   |
| MRPL37P1   | ENSG00000266946 | 471.5 | 0.14    |

|           |                 |        |         |
|-----------|-----------------|--------|---------|
| SPTAN1    | ENSG00000197694 | 471    | 59.765  |
| INO80C    | ENSG00000153391 | 471    | 48.39   |
| TMEM120B  | ENSG00000188735 | 471    | 25.93   |
| PSMA2     | ENSG00000256646 | 471    | 10.995  |
| TRAPPC8   | ENSG00000153339 | 470.5  | 45.91   |
| KDM2B     | ENSG00000089094 | 470.5  | 28.41   |
| THEM4     | ENSG00000159445 | 470.5  | 17.73   |
| CCDC136   | ENSG00000128596 | 470.5  | 15.335  |
| GLTSCR1   | ENSG00000063169 | 470.5  | 11.445  |
| MLXIPL    | ENSG00000009950 | 470.5  | 10.31   |
| SEMA3C    | ENSG00000075223 | 470.5  | 6.405   |
| EHD2      | ENSG00000024422 | 470.5  | 2.38    |
| CCT3      | ENSG00000163468 | 470    | 644.795 |
| UQCC1     | ENSG00000101019 | 470    | 45.265  |
| GNS       | ENSG00000135677 | 470    | 33.65   |
| PHKB      | ENSG00000102893 | 470    | 19.64   |
| NEDD4L    | ENSG00000049759 | 470    | 11.495  |
| FBXL4     | ENSG00000112234 | 470    | 6.98    |
| MAPT-AS1  | ENSG00000264589 | 470    | 0.16    |
| RFPL1S    | ENSG00000225465 | 470    | 0.15    |
| PHB       | ENSG00000167085 | 469.5  | 228.415 |
| NDC1      | ENSG00000058804 | 469.5  | 63.76   |
| PTPRC     | ENSG00000081237 | 469.5  | 0.145   |
| RPH3A     | ENSG00000089169 | 469.5  | 0       |
| GPR89A    | ENSG00000117262 | 469    | 30.48   |
| ZNF555    | ENSG00000186300 | 469    | 4       |
| EDA       | ENSG00000158813 | 469    | 2.815   |
| GGT3P     | ENSG00000197421 | 469    | 0       |
| CTCF      | ENSG00000102974 | 468.5  | 50.995  |
| FAM135A   | ENSG00000082269 | 468.5  | 17.57   |
| EXD2      | ENSG00000081177 | 468.5  | 13.475  |
| RAB28     | ENSG00000157869 | 468.5  | 12.82   |
| PBLD      | ENSG00000108187 | 468.5  | 4.68    |
| SH3GL2    | ENSG00000107295 | 468.5  | 1.89    |
| TYRO3     | ENSG00000092445 | 468.25 | 12.045  |
| VPS52     | ENSG00000223501 | 468    | 34.84   |
| RNF213    | ENSG00000173821 | 468    | 23.895  |
| MTMR12    | ENSG00000150712 | 468    | 17.485  |
| NR6A1     | ENSG00000148200 | 468    | 11.985  |
| TSPAN5    | ENSG00000168785 | 468    | 9.735   |
| SPON2     | ENSG00000159674 | 468    | 2.075   |
| LINC00877 | ENSG00000241163 | 468    | 0.41    |
| SYNDIG1   | ENSG00000101463 | 468    | 0       |
| BTF3L4P2  | ENSG00000213189 | 467.5  | 48.595  |
| NCAM1     | ENSG00000149294 | 467.5  | 19.695  |
| TANC1     | ENSG00000115183 | 467.5  | 11.675  |
| TRAF3IP2  | ENSG00000056972 | 467.5  | 9.635   |

|              |                 |        |         |
|--------------|-----------------|--------|---------|
| TRAF3IP2-AS1 | ENSG00000231889 | 467.5  | 8.77    |
| ADCY10       | ENSG00000143199 | 467.5  | 0.19    |
| TRIM60       | ENSG00000176979 | 467.5  | 0       |
| TRAP1        | ENSG00000126602 | 467    | 210.155 |
| LIG1         | ENSG00000105486 | 467    | 57.65   |
| CREB1        | ENSG00000118260 | 467    | 55.69   |
| ATF6B        | ENSG00000213676 | 467    | 43.84   |
| SGTB         | ENSG00000197860 | 467    | 18.01   |
| METTL21A     | ENSG00000144401 | 467    | 15.99   |
| RGMB         | ENSG00000174136 | 467    | 13.835  |
| RASSF8       | ENSG00000123094 | 467    | 13.54   |
| C4orf36      | ENSG00000163633 | 467    | 1.43    |
| SETBP1       | ENSG00000152217 | 467    | 0.665   |
| TNXB         | ENSG00000168477 | 467    | 0.55    |
| SHISA6       | ENSG00000188803 | 467    | 0       |
| HADHA        | ENSG00000084754 | 466.5  | 85.6    |
| ZNF511       | ENSG00000198546 | 466.5  | 62.845  |
| AFF4         | ENSG00000072364 | 466.5  | 49.015  |
| SLC25A13     | ENSG00000004864 | 466.5  | 42.255  |
| EBF4         | ENSG00000088881 | 466.5  | 6.435   |
| EDNRA        | ENSG00000151617 | 466.5  | 3.41    |
| STXBP6       | ENSG00000168952 | 466.5  | 1.815   |
| GNGT1        | ENSG00000127928 | 466.5  | 1.48    |
| CCDC170      | ENSG00000120262 | 466.5  | 0.59    |
| GTF2F2P1     | ENSG00000251254 | 466.5  | 0.29    |
| PRAP1        | ENSG00000165828 | 466.5  | 0.095   |
| CLNK         | ENSG00000109684 | 466.5  | 0       |
| BMP4         | ENSG00000125378 | 466.25 | 7.19    |
| CPNE1        | ENSG00000214078 | 466    | 73.82   |
| C7orf73      | ENSG00000243317 | 466    | 47.88   |
| ABLIM3       | ENSG00000173210 | 466    | 0.285   |
| CASP12       | ENSG00000204403 | 466    | 0.09    |
| FAM180A      | ENSG00000189320 | 466    | 0.04    |
