# Supplementary material for: Genes Possessing the Most Frequent DNA DSBs Are Highly Associated with Development and Cancers, and Essentially Overlap with the rDNA-Contacting Genes
Source: MDPI journal article supplement (doi:10.3390/ijms23137201), 2022-06-28
Supplement: s1 [file s1]

| DSB point    | TSS database | <i>z</i> | Correlation | <i>p</i> -value   | Pairs | <i>z</i> | Correlation | <i>p</i> -value   | Pairs | <i>z</i> | Correlation | <i>p</i> -value   | Pairs |
|--------------|--------------|----------|-------------|-------------------|-------|----------|-------------|-------------------|-------|----------|-------------|-------------------|-------|
| 100 kbp mean |              |          |             |                   |       | Q1       |             |                   |       | Q1+Q2+Q3 |             |                   |       |
| start        | EPD.bi       | -1.267   |             | 0.20510           | 87    | 2.979    | strong corr | 0.00289           | 41    | 10.683   | strong corr | <10 <sup>-6</sup> | 174   |
| end          | EPD.bi       | -1.446   |             | 0.14828           | 85    | 3.144    | strong corr | 0.00166           | 36    | 9.038    | strong corr | <10 <sup>-6</sup> | 155   |
| middle       | EPD.bi       | -1.866   |             | 0.06202           | 83    | 2.802    | strong corr | 0.00507           | 38    | 9.590    | strong corr | <10 <sup>-6</sup> | 161   |
| start        | EPD.uni      | -6.248   | strong anti | <10 <sup>-6</sup> | 3848  | -4.967   | strong anti | <10 <sup>-6</sup> | 8729  | 1.172    |             | 0.24118           | 10184 |
| end          | EPD.uni      | -6.189   | strong anti | <10 <sup>-6</sup> | 3851  | -5.013   | strong anti | <10 <sup>-6</sup> | 8727  | 1.372    |             | 0.16994           | 10177 |
| middle       | EPD.uni      | -6.278   | strong anti | <10 <sup>-6</sup> | 3849  | -5.168   | strong anti | <10 <sup>-6</sup> | 8730  | 0.700    |             | 0.48390           | 10185 |
| start        | GENCODE.bi   | -2.739   | strong anti | 0.00617           | 115   | 4.488    | strong corr | <10 <sup>-6</sup> | 49    | 10.710   | strong corr | <10 <sup>-6</sup> | 208   |
| end          | GENCODE.bi   | -2.675   | strong anti | 0.00747           | 113   | 4.569    | strong corr | <10 <sup>-6</sup> | 50    | 12.248   | strong corr | <10 <sup>-6</sup> | 208   |
| middle       | GENCODE.bi   | -3.082   | strong anti | 0.00205           | 113   | 3.137    | strong corr | 0.00171           | 43    | 11.395   | strong corr | <10 <sup>-6</sup> | 207   |
| start        | GENCODE.uni  | -4.711   | strong anti | <10 <sup>-6</sup> | 3501  | -4.262   | strong anti | 0.00002           | 6529  | 1.653    |             | 0.09832           | 7337  |
| end          | GENCODE.uni  | -4.753   | strong anti | <10 <sup>-6</sup> | 3505  | -4.460   | strong anti | <10 <sup>-6</sup> | 6538  | 1.935    |             | 0.05305           | 7334  |
| middle       | GENCODE.uni  | -4.768   | strong anti | <10 <sup>-6</sup> | 3504  | -4.510   | strong anti | <10 <sup>-6</sup> | 6533  | 1.844    |             | 0.06520           | 7342  |
| start        | RefSeq.bi    | -2.455   | anti        | 0.01408           | 139   | 5.127    | strong corr | <10 <sup>-6</sup> | 43    | 12.987   | strong corr | <10 <sup>-6</sup> | 244   |
| end          | RefSeq.bi    | -2.237   | anti        | 0.02529           | 139   | 5.119    | strong corr | <10 <sup>-6</sup> | 45    | 13.653   | strong corr | <10 <sup>-6</sup> | 244   |
| mid          | RefSeq.bi    | -2.581   | strong anti | 0.00984           | 137   | 4.078    | strong corr | 0.00005           | 39    | 13.825   | strong corr | <10 <sup>-6</sup> | 248   |
| start        | RefSeq.uni   | -4.640   | strong anti | <10 <sup>-6</sup> | 3872  | -5.136   | strong anti | <10 <sup>-6</sup> | 7935  | 1.497    |             | 0.13444           | 9035  |
| end          | RefSeq.uni   | -4.608   | strong anti | <10 <sup>-6</sup> | 3874  | -5.131   | strong anti | <10 <sup>-6</sup> | 7940  | 1.538    |             | 0.12402           | 9040  |
| middle       | RefSeq.uni   | -4.619   | strong anti | <10 <sup>-6</sup> | 3875  | -5.192   | strong anti | <10 <sup>-6</sup> | 7939  | 1.338    |             | 0.18086           | 9044  |

100kbp mean: DSB subset with the alignment depth threshold corresponding to the mean domain (the stretches between DSB) length 100kbp.

Q1: DSB top quartile (25%) by alignment depth subset.

Q1+Q2+Q3: DSB top three quartiles (75%) by alignment depth subset.

Red background: anticorrelation, points tends to be as far as possible from each other.

Green background: correlation, points tends to be as close as possible to each other.
